# Supplementary material
Source: PubMed Central journal article supplement (PMC6469859)
Supplement: NIHMS1505689-supplement-3.pdf [file NIHMS1505689-supplement-3.pdf]

**The CONTENTS Procedure**

|                     |                                  |                      |      |
|---------------------|----------------------------------|----------------------|------|
| Data Set Name       | FUNC.ALLCLINICAL00               | Observations         | 4796 |
| Member Type         | DATA                             | Variables            | 1226 |
| Engine              | V8                               | Indexes              | 0    |
| Created             | Friday, May 08, 2009 08:38:33 PM | Observation Length   | 9760 |
| Last Modified       | Friday, May 08, 2009 08:38:33 PM | Deleted Observations | 0    |
| Protection          |                                  | Compressed           | NO   |
| Data Set Type       |                                  | Sorted               | NO   |
| Label               |                                  |                      |      |
| Data Representation | WINDOWS_32                       |                      |      |
| Encoding            | wlatin1 Western (Windows)        |                      |      |

**Engine/ Host Dependent Information**

|                            |                                                                                   |
|----------------------------|-----------------------------------------------------------------------------------|
| Data Set Page Size         | 12288                                                                             |
| Number of Data Set Pages   | 4814                                                                              |
| First Data Page            | 19                                                                                |
| Max Obs per Page           | 1                                                                                 |
| Obs in First Data Page     | 1                                                                                 |
| Number of Data Set Repairs | 0                                                                                 |
| File Name                  | \\oaifsvr\oai\datamgmt\PDRProduction\datasets\functionalDS\allclinical00.sas7bdat |
| Release Created            | 9.0101M3                                                                          |
| Host Created               | NET_SRV                                                                           |

## The CONTENTS Procedure

## Alphabetic List of Variables and Attributes

| #    | Variable   | Type | Len | Format  | Informat | Label                                                                               |
|------|------------|------|-----|---------|----------|-------------------------------------------------------------------------------------|
| 1    | ID         | Char | 7   | \$7.    | \$7.     | ReleaseID                                                                           |
| 328  | P01ARTDOC  | Num  | 8   | YNDK.   | 3.       | SV:Q11.Currently seeing doctor or other health care professional for arthritis      |
| 539  | P01ARTDRCV | Num  | 8   | YNDK.   |          | SV:Q11a.Seeing doctor/ other professional for knee arthritis (calc)                 |
| 327  | P01ARTHOTH | Num  | 8   | YNDK.   | 3.       | SV:Q10.Doctor ever said you have some other type of arthritis                       |
| 363  | P01ARTL    | Num  | 8   | YNDK.   | 3.       | SV:Q34.Left knee, ever have arthroscopy (where they put a scope in knee)            |
| 364  | P01ARTL1   | Num  | 8   | 3.      | 3.       | SV:Q34ai.Left knee, how old at first arthroscopy                                    |
| 365  | P01ARTL2   | Num  | 8   | 3.      | 3.       | SV:Q34aii.Left knee, how old at second arthroscopy                                  |
| 366  | P01ARTL3   | Num  | 8   | 3.      | 3.       | SV:Q34aiii.Left knee, how old at third arthroscopy                                  |
| 367  | P01ARTLINJ | Num  | 8   | YNDK.   | 3.       | SV:Q34b.Left knee, was at least one arthroscopy to repair injury                    |
| 337  | P01ARTR    | Num  | 8   | YNDK.   | 3.       | SV:Q27.Right knee, ever have arthroscopy (where they put a scope in knee)           |
| 338  | P01ARTR1   | Num  | 8   | 3.      | 3.       | SV:Q27ai.Right knee, how old at first arthroscopy                                   |
| 339  | P01ARTR2   | Num  | 8   | 3.      | 3.       | SV:Q27aii.Right knee, how old at second arthroscopy                                 |
| 340  | P01ARTR3   | Num  | 8   | 3.      | 3.       | SV:Q27aiii.Right knee, how old at third arthroscopy                                 |
| 341  | P01ARTRINJ | Num  | 8   | YNDK.   | 3.       | SV:Q27b.Right knee, was at least one arthroscopy to repair injury                   |
| 298  | P01BL12SXL | Num  | 8   | BLPAIN. |          | SV:Left knee baseline frequent knee pain status (IEI, SV, both, or neither) (calc)  |
| 299  | P01BL12SXR | Num  | 8   | BLPAIN. |          | SV:Right knee baseline frequent knee pain status (IEI, SV, both, or neither) (calc) |
| 1043 | P01BMI     | Num  | 8   |         |          | SV:Body mass index (calc)                                                           |
| 136  | P01BP30    | Num  | 8   | YNDK.   | 3.       | SV:Q43.Any back pain, past 30 days                                                  |
| 137  | P01BP30OFT | Num  | 8   | BACK.   | 3.       | SV:Q43a.How often bothered by back pain, past 30 days                               |
| 296  | P01BPACTCV | Num  | 8   | YNDK.   |          | SV:Q43d.Limit activities due to back pain, past 30 days (calc)                      |
| 142  | P01BPB     | Num  | 8   | YNDK.   | 2.       | SV:Q43c.Back pain location, buttocks                                                |
| 138  | P01BPBAD   | Num  | 8   | CYBEX.  | 3.       | SV:Q43b.When had back pain how bad was it on average, past 30 days                  |
| 295  | P01BPBEDCV | Num  | 8   |         |          | SV:Q43di.How many days stay in bed due to back pain, past 30 days (calc)            |
| 294  | P01BPDAYCV | Num  | 8   |         |          | SV:Q43dii.How many days limit activities due to back pain, past 30 days (calc)      |

## The CONTENTS Procedure

## Alphabetic List of Variables and Attributes

| #    | Variable        | Type | Len | Format   | Informat | Label                                                                                                                                           |
|------|-----------------|------|-----|----------|----------|-------------------------------------------------------------------------------------------------------------------------------------------------|
| 143  | P01BPDK         | Num  | 8   | YNDK.    | 3.       | SV:Q43c.Back pain location, don't know                                                                                                          |
| 141  | P01BPLB         | Num  | 8   | YNDK.    | 2.       | SV:Q43c.Back pain location, lower back                                                                                                          |
| 140  | P01BPMB         | Num  | 8   | YNDK.    | 2.       | SV:Q43c.Back pain location, middle back                                                                                                         |
| 261  | P01BPTOT        | Num  | 8   |          |          | SV:Total days in bed and/ or limited activity due to back pain, past 30 days (calc)                                                             |
| 139  | P01BPUB         | Num  | 8   | YNDK.    | 2.       | SV:Q43c.Back pain location, upper back                                                                                                          |
| 1195 | P01BROHRCV      | Num  | 8   | YNDK.    |          | SV:Q12d.Brother had hip replacement surgery (calc)                                                                                              |
| 1199 | P01BROKRCV      | Num  | 8   | YNDK.    |          | SV:Q13d.Brother had knee replacement surgery (calc)                                                                                             |
| 1148 | P01CLAU         | Num  | 8   | YNDK.    | 3.       | SV:Q4.Have claustrophobia                                                                                                                       |
| 1193 | P01DADHRCV      | Num  | 8   | YNDK.    |          | SV:Q12b.Father had hip replacement surgery (calc)                                                                                               |
| 1197 | P01DADKRCV      | Num  | 8   | YNDK.    |          | SV:Q13b.Father had knee replacement surgery (calc)                                                                                              |
| 1144 | P01FAMHR        | Num  | 8   | YNDK.    | 3.       | SV:Q12.Mother, father, sister, or brother (blood relative) had hip replacement surgery for arthritis, where all or part of hip joint replaced   |
| 1145 | <b>P01FAMKR</b> | Num  | 8   | YNDK.    | 3.       | SV:Q13.Mother, father, sister, or brother (blood relative) had knee replacement surgery for arthritis, where all or part of knee joint replaced |
| 537  | P01GOUTCV       | Num  | 8   | YNDK.    |          | SV:Q10f.Doctor said you had gout (calc)                                                                                                         |
| 1041 | P01HEIGHT       | Num  | 8   |          |          | SV:Average height (mm) (calc)                                                                                                                   |
| 900  | P01HESTFID      | Char | 4   | \$4.     | \$4.     | SV:Hand exam: staff ID #                                                                                                                        |
| 260  | P01HPL12CV      | Num  | 8   | YNDK.    |          | SV:Q39a.Left hip pain, aching or stiffness: more than half the days of a month, past 12 months (calc)                                           |
| 129  | P01HPNL12       | Num  | 8   | YNDK.    | 3.       | SV:Q39.Left hip pain, aching or stiffness: any, past 12 months (includes pain in groin and in front and sides of upper thigh)                   |
| 133  | P01HPNLB        | Num  | 8   | HIPPAIN. | 2.       | SV:Q39ai.Left hip pain, aching or stiffness location: buttocks                                                                                  |
| 135  | P01HPNLDK       | Num  | 8   | HIPPAIN. | 3.       | SV:Q39ai.Left hip pain, aching or stiffness location: don't know                                                                                |
| 132  | P01HPNLFL       | Num  | 8   | HIPPAIN. | 2.       | SV:Q39ai.Left hip pain, aching or stiffness location: front of leg near hip                                                                     |
| 130  | P01HPNLIL       | Num  | 8   | HIPPAIN. | 2.       | SV:Q39ai.Left hip pain, aching or stiffness location: groin/ inside leg near hip                                                                |
| 134  | P01HPNLLB       | Num  | 8   | HIPPAIN. | 2.       | SV:Q39ai.Left hip pain, aching or stiffness location: lower back                                                                                |
| 131  | P01HPNLOL       | Num  | 8   | HIPPAIN. | 2.       | SV:Q39ai.Left hip pain, aching or stiffness location: outside of leg near hip                                                                   |

## The CONTENTS Procedure

## Alphabetic List of Variables and Attributes

| #   | Variable       | Type | Len | Format   | Informat | Label                                                                                                                          |
|-----|----------------|------|-----|----------|----------|--------------------------------------------------------------------------------------------------------------------------------|
| 122 | P01HPNR12      | Num  | 8   | YNDK.    | 3.       | SV:Q38.Right hip pain, aching or stiffness: any, past 12 months (includes pain in groin and in front and sides of upper thigh) |
| 126 | P01HPNRB       | Num  | 8   | HIPPAIN. | 2.       | SV:Q38ai.Right hip pain, aching or stiffness location: buttocks                                                                |
| 128 | P01HPNRDK      | Num  | 8   | HIPPAIN. | 3.       | SV:Q38ai.Right hip pain, aching or stiffness location: don't know                                                              |
| 125 | P01HPNRFL      | Num  | 8   | HIPPAIN. | 2.       | SV:Q38ai.Right hip pain, aching or stiffness location: front of leg near hip                                                   |
| 123 | P01HPNRIL      | Num  | 8   | HIPPAIN. | 2.       | SV:Q38ai.Right hip pain, aching or stiffness location: groin/ inside leg near hip                                              |
| 127 | P01HPNRLB      | Num  | 8   | HIPPAIN. | 2.       | SV:Q38ai.Right hip pain, aching or stiffness location: lower back                                                              |
| 124 | P01HPNROL      | Num  | 8   | HIPPAIN. | 2.       | SV:Q38ai.Right hip pain, aching or stiffness location: outside of leg near hip                                                 |
| 259 | P01HPR12CV     | Num  | 8   | YNDK.    |          | SV:Q38a.Right hip pain, aching or stiffness: more than half the days of a month, past 12 months (calc)                         |
| 382 | P01HRS         | Num  | 8   | YNDK.    | 3.       | SV:Q40.Ever had hip replacement surgery where all or part of joint was replaced                                                |
| 386 | P01HRSL        | Num  | 8   | YNDK.    | 3.       | SV:Q42.Left hip, ever had replaced                                                                                             |
| 388 | P01HRSLDK      | Num  | 8   | YNDK.    | 3.       | SV:Q42a.Left hip replacement reason, don't know                                                                                |
| 609 | P01HRSLFXO     | Num  | 8   | YNDK.    |          | SV:Left hip replacement reason, hip fracture or other (calc)                                                                   |
| 387 | P01HRSLOA      | Num  | 8   | YNDK.    | 3.       | SV:Q42a.Left hip replacement reason, osteoarthritis or degenerative arthritis                                                  |
| 383 | P01HRSR        | Num  | 8   | YNDK.    | 3.       | SV:Q41.Right hip, ever had replaced                                                                                            |
| 385 | P01HRSRDK      | Num  | 8   | YNDK.    | 3.       | SV:Q41a.Right hip replacement reason, don't know                                                                               |
| 608 | P01HRSRFXO     | Num  | 8   | YNDK.    |          | SV:Right hip replacement reason, hip fracture or other (calc)                                                                  |
| 384 | P01HRSROA      | Num  | 8   | YNDK.    | 3.       | SV:Q41a.Right hip replacement reason, osteoarthritis or degenerative arthritis                                                 |
| 393 | P01HYS         | Num  | 8   | YNDK.    | 3.       | SV:Q3.Ever had a hysterectomy (surgery to remove uterus or womb)                                                               |
| 394 | P01HYSAGE      | Num  | 8   | 3.       | 3.       | SV:Q3a.How old when had hysterectomy                                                                                           |
| 356 | <b>P01INJL</b> | Num  | 8   | YNDK.    | 3.       | SV:Q31.Left knee, ever injured badly enough to limit ability to walk for at least two days                                     |
| 357 | P01INJL1       | Num  | 8   | 3.       | 3.       | <b>SV:Q31i.Left knee, how old at first injury</b>                                                                              |
| 358 | P01INJL2       | Num  | 8   | 3.       | 3.       | <b>SV:Q31ii.Left knee, how old at second injury</b>                                                                            |
| 359 | P01INJL3       | Num  | 8   | 3.       | 3.       | <b>SV:Q31iii.Left knee, how old at third injury</b>                                                                            |

## The CONTENTS Procedure

## Alphabetic List of Variables and Attributes

| #   | Variable   | Type | Len | Format  | Informat | Label                                                                                                                                         |
|-----|------------|------|-----|---------|----------|-----------------------------------------------------------------------------------------------------------------------------------------------|
| 330 | P01INJR    | Num  | 8   | YNDK.   | 3.       | SV:Q24.Right knee, ever injured badly enough to limit ability to walk for at least two days                                                   |
| 331 | P01INJR1   | Num  | 8   | 3.      | 3.       | SV:Q24ai.Right knee, how old at first injury                                                                                                  |
| 332 | P01INJR2   | Num  | 8   | 3.      | 3.       | SV:Q24aai.Right knee, how old at second injury                                                                                                |
| 333 | P01INJR3   | Num  | 8   | 3.      | 3.       | SV:Q24aiii.Right knee, how old at third injury                                                                                                |
| 279 | P01KPA30CV | Num  | 8   | YNDK.   |          | SV:Q20b.Either knee, avoid/ reduce pain, aching or stiffness by changing or cutting back on normal activities, past 30 days (calc)            |
| 300 | P01KPACDCV | Num  | 8   |         |          | SV:Q20a.Either knee, how many days limit activities due to pain, aching or stiffness, past 30 days (calc)                                     |
| 121 | P01KPACT30 | Num  | 8   | YNDK.   | 3.       | SV:Q20.Either knee, limit activities due to pain, aching or stiffness, past 30 days                                                           |
| 258 | P01KPACTCV | Num  | 8   | KPACT.  |          | SV:Either knee, limits or avoids activities due to pain, aching or stiffness, past 30 days (calc)                                             |
| 278 | P01KPL12CV | Num  | 8   | YNDK.   |          | SV:Q18a.Left knee pain, aching or stiffness: more than half the days of a month, past 12 months (calc)                                        |
| 257 | P01KPL30CV | Num  | 8   | YNDK.   |          | SV:Q19a.Left knee pain, aching or stiffness: more than half the days, past 30 days (calc)                                                     |
| 329 | P01KPMED   | Num  | 8   | YNDK.   | 3.       | SV:Q21.Either knee, used medication for pain, aching or stiffness, past 12 months                                                             |
| 540 | P01KPMEDCV | Num  | 8   | YNDK.   |          | SV:Q21a.Either knee, used med for pain, aching or stiffness more than half the days of a month, past 12 mo (calc, used for study eligibility) |
| 119 | P01KPNL12  | Num  | 8   | YNDK.   | 3.       | SV:Q18.Left knee pain, aching or stiffness: any, past 12 months                                                                               |
| 120 | P01KPNL12M | Num  | 8   | 3.      | 3.       | SV:Q18ai.Left knee pain, aching or stiffness: how many months on more than half the days of a month, past 12 months                           |
| 117 | P01KPNLEV  | Num  | 8   | YNDK.   | 3.       | SV:Q17.Left knee pain, aching or stiffness: ever had more than half the days of a month                                                       |
| 118 | P01KPNLEVY | Num  | 8   | YEAR3Z. | 3.       | SV:Q17a.Left knee pain, aching or stiffness: started about how many years ago                                                                 |
| 115 | P01KPNR12  | Num  | 8   | YNDK.   | 3.       | SV:Q15.Right knee pain, aching or stiffness: any, past 12 months                                                                              |
| 116 | P01KPNR12M | Num  | 8   | 3.      | 3.       | SV:Q15ai.Right knee pain, aching or stiffness: how many months on more than half the days of a month, past 12 months                          |
| 113 | P01KPNREV  | Num  | 8   | YNDK.   | 3.       | SV:Q14.Right knee pain, aching or stiffness: ever had more than half the days of a month                                                      |

## The CONTENTS Procedure

## Alphabetic List of Variables and Attributes

| #    | Variable      | Type | Len | Format   | Informat | Label                                                                                                                           |
|------|---------------|------|-----|----------|----------|---------------------------------------------------------------------------------------------------------------------------------|
| 114  | P01KPNREVV    | Num  | 8   | YEAR3Z.  | 3.       | SV:Q14a.Right knee pain, aching or stiffness: started about how many years ago                                                  |
| 277  | P01KPR12CV    | Num  | 8   | YNDK.    |          | SV:Q15a.Right knee pain, aching or stiffness: more than half the days of a month, past 12 months (calc)                         |
| 256  | P01KPR30CV    | Num  | 8   | YNDK.    |          | SV:Q16a.Right knee pain, aching or stiffness: more than half the days, past 30 days (calc)                                      |
| 361  | P01KRSL       | Num  | 8   | YNDK.    | 3.       | SV:Q33.Left knee, ever have replacement where all or part of joint was replaced                                                 |
| 362  | P01KRSLA      | Num  | 8   | 3.       | 3.       | SV:Q33a.Left knee, how old when first had replaced                                                                              |
| 335  | P01KRSR       | Num  | 8   | YNDK.    | 3.       | SV:Q26.Right knee, ever have replacement surgery where all or part of joint was replaced                                        |
| 336  | P01KRSRA      | Num  | 8   | 3.       | 3.       | SV:Q26a.Right knee, how old when first had replaced                                                                             |
| 360  | P01KSURGL     | Num  | 8   | YNDK.    | 3.       | SV:Q32.Left knee, ever have surgery or arthroscopy                                                                              |
| 334  | P01KSURGR     | Num  | 8   | YNDK.    | 3.       | SV:Q25.Right knee, ever have surgery or arthroscopy                                                                             |
| 297  | P01KSX        | Num  | 8   | SXBYPER. |          | SV:Frequent knee pain status by person (calc)                                                                                   |
| 1049 | P01LH1CV      | Num  | 8   | JOINT.   |          | SV:Left hand exam: joint 1 (calc)                                                                                               |
| 1050 | P01LH2CV      | Num  | 8   | JOINT.   |          | SV:Left hand exam: joint 2 (calc)                                                                                               |
| 1051 | P01LH3CV      | Num  | 8   | JOINT.   |          | SV:Left hand exam: joint 3 (calc)                                                                                               |
| 1052 | P01LH4CV      | Num  | 8   | JOINT.   |          | SV:Left hand exam: joint 4 (calc)                                                                                               |
| 1053 | P01LH5CV      | Num  | 8   | JOINT.   |          | SV:Left hand exam: joint 5 (calc)                                                                                               |
| 1055 | P01LHBE       | Num  | 8   | LADDER.  |          | SV:Left hand exam: total number of bony enlargements (calc)                                                                     |
| 301  | P01LKP30CV    | Num  | 8   | YNDK.    |          | SV:Q19.Left knee pain, aching or stiffness: any, past 30 days (calc)                                                            |
| 291  | P01LKSX       | Num  | 8   | KPNFR.   |          | SV:Left knee baseline symptom status (combines past 30 days and 12 months, calc, used in OAI definition of symptomatic knee OA) |
| 373  | <b>P01LRL</b> | Num  | 8   | YNDK.    | 3.       | SV:Q36.Left knee, ever have ligament repair surgery                                                                             |
| 374  | P01LRL1       | Num  | 8   | 3.       | 3.       | SV:Q36ai.Left knee, how old at first ligament repair surgery                                                                    |
| 375  | P01LRL2       | Num  | 8   | 3.       | 3.       | SV:Q36aii.Left knee, how old at second ligament repair surgery                                                                  |
| 376  | P01LRL3       | Num  | 8   | 3.       | 3.       | SV:Q36aiii.Left knee, how old at third ligament repair surgery                                                                  |
| 347  | <b>P01LRR</b> | Num  | 8   | YNDK.    | 3.       | SV:Q29.Right knee, ever have ligament repair surgery                                                                            |

## The CONTENTS Procedure

## Alphabetic List of Variables and Attributes

| #    | Variable   | Type | Len | Format  | Informat | Label                                                                                                             |
|------|------------|------|-----|---------|----------|-------------------------------------------------------------------------------------------------------------------|
| 348  | P01LRR1    | Num  | 8   | 3.      | 3.       | SV:Q29ai.Right knee, how old at first ligament repair surgery                                                     |
| 349  | P01LRR2    | Num  | 8   | 3.      | 3.       | SV:Q29aaii.Right knee, how old at second ligament repair surgery                                                  |
| 350  | P01LRR3    | Num  | 8   | 3.      | 3.       | SV:Q29aaiii.Right knee, how old at third ligament repair surgery                                                  |
| 292  | P01LSXKOA  | Num  | 8   | YNDK.   |          | SV:Left knee baseline symptomatic OA status (calc)                                                                |
| 4    | P01LXRKOA  | Num  | 8   | YNDK.   |          | SV:Left knee baseline radiographic OA (definite osteophytes, calc, used in OAI definition of symptomatic knee OA) |
| 55   | P01LXRKOA2 | Num  | 8   | XRKOA.  |          | SV:Left knee baseline x-ray: osteophytes and JSN (calc)                                                           |
| 368  | P01MENL    | Num  | 8   | YNDK.   | 3.       | SV:Q35.Left knee, ever have meniscectomy (where they repaired or cut away torn meniscus or cartilage)             |
| 369  | P01MENL1   | Num  | 8   | 3.      | 3.       | SV:Q35ai.Left knee, how old at first meniscectomy                                                                 |
| 370  | P01MENL2   | Num  | 8   | 3.      | 3.       | SV:Q35aaii.Left knee, how old at second meniscectomy                                                              |
| 371  | P01MENL3   | Num  | 8   | 3.      | 3.       | SV:Q35aaiii.Left knee, how old at third meniscectomy                                                              |
| 372  | P01MENLINJ | Num  | 8   | YNDK.   | 3.       | SV:Q35b.Left knee, was at least one meniscectomy to repair an injury                                              |
| 342  | P01MENR    | Num  | 8   | YNDK.   | 3.       | SV:Q28.Right knee, ever have meniscectomy (where they repaired or cut away torn meniscus or cartilage)            |
| 343  | P01MENR1   | Num  | 8   | 3.      | 3.       | SV:Q28ai.Right knee, how old at first meniscectomy                                                                |
| 344  | P01MENR2   | Num  | 8   | 3.      | 3.       | SV:Q28aaii.Right knee, how old at second meniscectomy                                                             |
| 345  | P01MENR3   | Num  | 8   | 3.      | 3.       | SV:Q28aaiii.Right knee, how old at third meniscectomy                                                             |
| 346  | P01MENRINJ | Num  | 8   | YNDK.   | 3.       | SV:Q28b.Right knee, was at least one meniscectomy to repair an injury                                             |
| 395  | P01MENSTR  | Num  | 8   | YEAR2Z. | 3.       | SV:Q5.When was your last natural menstrual period                                                                 |
| 1192 | P01MOMHRCV | Num  | 8   | YNDK.   |          | SV:Q12a.Mother had hip replacement surgery (calc)                                                                 |
| 1196 | P01MOMKRCV | Num  | 8   | YNDK.   |          | SV:Q13a.Mother had knee replacement surgery (calc)                                                                |
| 1147 | P01MRCMP   | Num  | 8   | YNDK.   | 3.       | SV:Q1b.Able to complete MRI scan                                                                                  |
| 1146 | P01MRIB4   | Num  | 8   | YNDK.   | 3.       | SV:Q1.Ever had MRI before                                                                                         |
| 1200 | P01MRKCBCV | Num  | 8   | KNEE3X. |          | SV:Q1c.Knees fit comfortably inside knee coil with coil completely closed (calc)                                  |

## The CONTENTS Procedure

## Alphabetic List of Variables and Attributes

| #    | Variable   | Type | Len | Format  | Informat | Label                                                                                                         |
|------|------------|------|-----|---------|----------|---------------------------------------------------------------------------------------------------------------|
| 1219 | P01MRPRBCV | Num  | 8   | YNDK.   |          | SV:Q1a.Any problems related to the MRI scan (calc)                                                            |
| 535  | P01OABCKCV | Num  | 8   | YNDK.   |          | SV:Q10d.Doctor said you had osteoarthritis/ degenerative arthritis in back/ neck (calc)                       |
| 532  | P01OADEGCV | Num  | 8   | YNDK.   |          | SV:Q10a.Doctor said you had osteoarthritis/ degenerative arthritis in knee (calc)                             |
| 102  | P01OAGRDL  | Num  | 8   | COMPOA. |          | SV:Left knee baseline x-ray: composite OA grade (quasi KL grade) (calc)                                       |
| 95   | P01OAGRDR  | Num  | 8   | COMPOA. |          | SV:Right knee baseline x-ray: composite OA grade (quasi KL grade) (calc)                                      |
| 533  | P01OAHIPCV | Num  | 8   | YNDK.   |          | SV:Q10b.Doctor said you had osteoarthritis/ degenerative arthritis in hip (calc)                              |
| 534  | P01OAHNDCV | Num  | 8   | YNDK.   |          | SV:Q10c.Doctor said you had osteoarthritis/ degenerative arthritis in hand/ fingers (calc)                    |
| 536  | P01OAOTHCV | Num  | 8   | YNDK.   |          | SV:Q10e.Doctor said you had osteoarthritis/ degenerative arthritis in some other joint (calc)                 |
| 153  | P01OJPNLA  | Num  | 8   | YNDK.   | 2.       | SV:Q44.Left ankle pain, aching or stiffness: more than half the days, past 30 days                            |
| 147  | P01OJPNLE  | Num  | 8   | YNDK.   | 2.       | SV:Q44.Left elbow pain, aching or stiffness: more than half the days, past 30 days                            |
| 155  | P01OJPNLF  | Num  | 8   | YNDK.   | 2.       | SV:Q44.Left foot pain, aching or stiffness: more than half the days, past 30 days                             |
| 151  | P01OJPNLH  | Num  | 8   | YNDK.   | 2.       | SV:Q44.Left hand/ finger pain, aching or stiffness: more than half the days, past 30 days                     |
| 145  | P01OJPNLS  | Num  | 8   | YNDK.   | 3.       | SV:Q44.Left shoulder pain, aching or stiffness: more than half the days, past 30 days                         |
| 149  | P01OJPNLW  | Num  | 8   | YNDK.   | 2.       | SV:Q44.Left wrist pain, aching or stiffness: more than half the days, past 30 days                            |
| 156  | P01OJPNNK  | Num  | 8   | YNDK.   | 2.       | SV:Q44.Neck pain, aching or stiffness: more than half the days, past 30 days                                  |
| 157  | P01OJPNNO  | Num  | 8   | YNDK.   | 3.       | SV:Q44.Other joints pain, aching or stiffness: more than half the days, past 30 days, no, don't know, refused |
| 152  | P01OJPNRA  | Num  | 8   | YNDK.   | 3.       | SV:Q44.Right ankle pain, aching or stiffness: more than half the days, past 30 days                           |
| 146  | P01OJPNRE  | Num  | 8   | YNDK.   | 2.       | SV:Q44.Right elbow pain, aching or stiffness: more than half the days, past 30 days                           |
| 154  | P01OJPNRF  | Num  | 8   | YNDK.   | 2.       | SV:Q44.Right foot pain, aching or stiffness: more than half the days, past 30 days                            |



## The CONTENTS Procedure

## Alphabetic List of Variables and Attributes

| #   | Variable          | Type | Len | Format       | Informat | Label                                                                                      |
|-----|-------------------|------|-----|--------------|----------|--------------------------------------------------------------------------------------------|
| 150 | P01OJPNRH         | Num  | 8   | YNDK.        | 2.       | SV:Q44.Right hand/ finger pain, aching or stiffness: more than half the days, past 30 days |
| 144 | P01OJPNRS         | Num  | 8   | YNDK.        | 3.       | SV:Q44.Right shoulder pain, aching or stiffness: more than half the days, past 30 days     |
| 148 | P01OJPNRW         | Num  | 8   | YNDK.        | 2.       | SV:Q44.Right wrist pain, aching or stiffness: more than half the days, past 30 days        |
| 538 | P01OTARTCV        | Num  | 8   | <u>YNDK.</u> |          | SV:Q10g.Doctor said you had some other type of arthritis (calc)                            |
| 378 | P01OTSL1          | Num  | 8   | 3.           | 3.       | SV:Q37bi.Left knee, how old at first other surgery                                         |
| 379 | P01OTSL2          | Num  | 8   | 3.           | 3.       | SV:Q37bii.Left knee, how old at second other surgery                                       |
| 380 | P01OTSL3          | Num  | 8   | 3.           | 3.       | SV:Q37biii.Left knee, how old at third other surgery                                       |
| 381 | P01OTSLINJ        | Num  | 8   | YNDK.        | 3.       | SV:Q37c. <b>Left knee, was at least one other surgery to repair an injury</b>              |
| 352 | P01OTSR1          | Num  | 8   | 3.           | 3.       | SV:Q30bi.Right knee, how old at first other surgery                                        |
| 353 | P01OTSR2          | Num  | 8   | 3.           | 3.       | SV:Q30bii.Right knee, how old at second other surgery                                      |
| 354 | P01OTSR3          | Num  | 8   | 3.           | 3.       | SV:Q30biii.Right knee, how old at third other surgery                                      |
| 355 | P01OTSRINJ        | Num  | 8   | YNDK.        | 3.       | SV:Q30c. <b>Right knee, was at least one other surgery to repair an injury</b>             |
| 377 | P01OTSURGL        | Num  | 8   | YNDK.        | 3.       | SV:Q37.Left knee, ever have any other kind of surgery                                      |
| 351 | P01OTSURGR        | Num  | 8   | YNDK.        | 3.       | SV:Q30.Right knee, ever have any other kind of surgery                                     |
| 391 | P01OV1AGE         | Num  | 8   | 3.           | 3.       | SV:Q2bi.How old when ovary/ ovaries removed (first surgery)                                |
| 392 | P01OV2AGE         | Num  | 8   | 3.           | 3.       | SV:Q2bii.How old when ovary removed (second surgery)                                       |
| 541 | P01OVNUMCV        | Num  | 8   | LADDER.      |          | SV:Q2a.How many ovaries removed (calc)                                                     |
| 390 | P01OVREM          | Num  | 8   | YNDK.        | 3.       | SV:Q2. <b>Ever had ovary removed</b>                                                       |
| 283 | <b>P01PMLKRCV</b> | Num  | 8   | PNSCALE.     |          | SV:Q19b.Left knee pain: severity, past 30 days, rated on scale of 0- 10 (calc)             |
| 282 | <b>P01PMRKRCV</b> | Num  | 8   | PNSCALE.     |          | SV:Q16b.Right knee pain: severity, past 30 days, rated on scale of 0- 10 (calc)            |
| 389 | P01PREGEV         | Num  | 8   | YNDK.        | 3.       | SV:Q1.Have you ever been pregnant                                                          |

## The CONTENTS Procedure

## Alphabetic List of Variables and Attributes

| #    | Variable   | Type | Len | Format   | Informat | Label                                                                                                               |
|------|------------|------|-----|----------|----------|---------------------------------------------------------------------------------------------------------------------|
| 323  | P01RA1YES  | Num  | 8   | YNDK.    | 2.       | SV:Q6.RA symptoms: at least one Yes response for any wrist or finger in question #4a - b                            |
| 322  | P01RA3YES  | Num  | 8   | YNDK.    | 2.       | SV:Q5.RA symptoms: 3 or more Yes responses to questions #2a, #3, and #4a - d                                        |
| 319  | P01RAFT6L  | Num  | 8   | YNDK.    | 3.       | SV:Q4b.RA symptoms: left fingers or thumb swelling, ever had lasting more than 6 weeks                              |
| 318  | P01RAFT6R  | Num  | 8   | YNDK.    | 3.       | SV:Q4b.RA symptoms: right fingers or thumb swelling, ever had lasting more than 6 weeks                             |
| 316  | P01RAIA    | Num  | 8   | YNDK.    | 3.       | SV:Q1.Doctor ever said you have rheumatoid arthritis or other inflammatory arthritis                                |
| 317  | P01RAJS1HR | Num  | 8   | YNDK.    | 3.       | SV:Q2.RA symptoms: ever had joint stiffness in any joints lasting at least one hour in the morning                  |
| 530  | P01RAJSCV  | Num  | 8   | YNDK.    |          | SV:Q2a.RA Symptoms: have morning stiffness (in any joints lasting at least one hour) for more than six weeks (calc) |
| 321  | P01RAKN6L  | Num  | 8   | YNDK.    | 3.       | SV:Q4d.RA symptoms: left knee swelling, ever had lasting more than 6 weeks                                          |
| 320  | P01RAKN6R  | Num  | 8   | YNDK.    | 3.       | SV:Q4d.RA symptoms: right knee swelling, ever had lasting more than 6 weeks                                         |
| 324  | P01RARLYES | Num  | 8   | YNDK.    | 2.       | SV:Q7.RA symptoms: both right and left marked Yes for wrist, fingers, elbow or knee in question #4a - d             |
| 583  | P01RASTASV | Num  | 8   | RASTASV. |          | SV:RA/ other inflammatory arthritis diagnosis and medication status, self-report (calc)                             |
| 325  | P01RATEST  | Num  | 8   | YNDK.    | 3.       | SV:Q8.RA Symptoms: ever had blood test for rheumatoid arthritis                                                     |
| 326  | P01RATOT3  | Num  | 8   | YNDK.    | 3.       | SV:Q9.RA symptoms: total score more than 3                                                                          |
| 605  | P01RATOTCV | Num  | 8   | LADDER.  |          | SV:Q9.RA symptoms: total score for questions #2 through #8 (calc)                                                   |
| 531  | P01RATSTCV | Num  | 8   | RATST.   |          | SV:Q8a.RA Symptoms: RA blood test results (calc)                                                                    |
| 607  | P01RAW6L   | Num  | 8   | YNDK.    |          | SV:RA symptoms: left wrist or elbow swelling, ever had lasting more than 6 weeks (calc)                             |
| 610  | P01RAW6R   | Num  | 8   | YNDK.    |          | SV:RA symptoms: right wrist or elbow swelling, ever had lasting more than 6 weeks (calc)                            |
| 1044 | P01RH1CV   | Num  | 8   | JOINT.   |          | SV:Right hand exam: joint 1 (calc)                                                                                  |
| 1045 | P01RH2CV   | Num  | 8   | JOINT.   |          | SV:Right hand exam: joint 2 (calc)                                                                                  |
| 1046 | P01RH3CV   | Num  | 8   | JOINT.   |          | SV:Right hand exam: joint 3 (calc)                                                                                  |

## The CONTENTS Procedure

## Alphabetic List of Variables and Attributes

| #    | Variable   | Type | Len | Format    | Informat     | Label                                                                                                                            |
|------|------------|------|-----|-----------|--------------|----------------------------------------------------------------------------------------------------------------------------------|
| 1047 | P01RH4CV   | Num  | 8   | JOINT.    |              | SV:Right hand exam: joint 4 (calc)                                                                                               |
| 1048 | P01RH5CV   | Num  | 8   | JOINT.    |              | SV:Right hand exam: joint 5 (calc)                                                                                               |
| 1054 | P01RHBE    | Num  | 8   | LADDER.   |              | SV:Right hand exam: total number of bony enlargements (calc)                                                                     |
| 302  | P01RKP30CV | Num  | 8   | YNDK.     |              | SV:Q16.Right knee pain, aching or stiffness: any, past 30 days (calc)                                                            |
| 290  | P01RKSX    | Num  | 8   | KPNFR.    |              | SV:Right knee baseline symptom status (combines past 30 days and 12 months, calc, used in OAI definition of symptomatic knee OA) |
| 293  | P01RSXKOA  | Num  | 8   | YNDK.     |              | SV:Right knee baseline symptomatic OA status (calc)                                                                              |
| 3    | P01RXRKOA  | Num  | 8   | YNDK.     |              | SV:Right knee baseline radiographic OA (definite osteophytes, calc, used in OAI definition of symptomatic knee OA)               |
| 54   | P01RXRKOA2 | Num  | 8   | XRKOA.    |              | SV:Right knee baseline x-ray: osteophytes and JSN (calc)                                                                         |
| 1194 | P01SISHRCV | Num  | 8   | YNDK.     |              | SV:Q12c.Sister had hip replacement surgery (calc)                                                                                |
| 1198 | P01SISKRCV | Num  | 8   | YNDK.     |              | SV:Q13c.Sister had knee replacement surgery (calc)                                                                               |
| 899  | P01STFID1  | Char | 4   | \$4.      | \$4.         | SV:Weight: staff ID #                                                                                                            |
| 898  | P01STFID2  | Char | 4   | \$4.      | \$4.         | SV:Height (standing): staff ID#                                                                                                  |
| 1143 | P01SVDATE  | Num  | 8   | MMDDYY10. | DATETIME22.3 | SV:Date Screening Visit completed                                                                                                |
| 49   | P01SVLKJSL | Num  | 8   | X_RAY4Z.  | 2.           | SV:Left knee baseline x-ray: evidence of knee lateral joint space narrowing (calc)                                               |
| 47   | P01SVLKJSM | Num  | 8   | X_RAY4Z.  | 2.           | SV:Left knee baseline x-ray: evidence of knee medial joint space narrowing (calc)                                                |
| 51   | P01SVLKMI  | Num  | 8   | YNDK.     | 2.           | SV:Left knee baseline x-ray: evidence of knee metal artifacts (calc)                                                             |
| 45   | P01SVLKOST | Num  | 8   | XRAY3Z.   | 2.           | SV:Left knee baseline x-ray: evidence of knee osteophytes (calc)                                                                 |
| 48   | P01SVRKJSL | Num  | 8   | X_RAY4Z.  | 2.           | SV:Right knee baseline x-ray: evidence of knee lateral joint space narrowing (calc)                                              |
| 46   | P01SVRKJSM | Num  | 8   | X_RAY4Z.  | 2.           | SV:Right knee baseline x-ray: evidence of knee medial joint space narrowing (calc)                                               |
| 50   | P01SVRKMI  | Num  | 8   | YNDK.     | 2.           | SV:Right knee baseline x-ray: evidence of knee metal artifacts (calc)                                                            |
| 44   | P01SVRKOST | Num  | 8   | XRAY3Z.   | 2.           | SV:Right knee baseline x-ray: evidence of knee osteophytes (calc)                                                                |

## The CONTENTS Procedure

## Alphabetic List of Variables and Attributes

| #   | Variable   | Type | Len | Format   | Informat | Label                                                                                                                                             |
|-----|------------|------|-----|----------|----------|---------------------------------------------------------------------------------------------------------------------------------------------------|
| 52  | P01SVXRELK | Num  | 8   | LRB.     | 2.       | SV:Baseline knee x-ray: knee(s) eligible for MRI based on x-ray (calc)                                                                            |
| 43  | P01SVXRLKR | Num  | 8   | YNDK.    | 2.       | SV:Left knee baseline x-ray: evidence of knee replacement (calc)                                                                                  |
| 41  | P01SVXRRID | Char | 4   | \$4.     | \$4.     | SV:Baseline knee x-ray: clinical center reader ID # (calc)                                                                                        |
| 42  | P01SVXRRKR | Num  | 8   | YNDK.    | 2.       | SV:Right knee baseline x-ray: evidence of knee replacement (calc)                                                                                 |
| 276 | P01SXKOA   | Num  | 8   | KNEESF.  |          | SV:Baseline symptomatic knee OA status by person (calc, used for study elig (>0) and in OAI definition of cohort status)                          |
| 284 | P01TJE30CV | Num  | 8   | YNDK.    |          | SV:Q45b.TMJ: jaw joint or in front of ear, experienced pain or aching, past 30 days (calc)                                                        |
| 286 | P01TJE30WC | Num  | 8   | TIME21X. |          | SV:Q45bii.TMJ: jaw joint or in front of ear, how often worried or concerned about pain or aching, past 30 days (calc)                             |
| 285 | P01TJF30CV | Num  | 8   | YNDK.    |          | SV:Q46b.TMJ: across face or cheek, experienced pain or aching, past 30 days (calc)                                                                |
| 287 | P01TJF30WC | Num  | 8   | TIME21X. |          | SV:Q46bii.TMJ: across face or cheek, how often worried or concerned about pain or aching, past 30 days (calc)                                     |
| 161 | P01TMJE30A | Num  | 8   | 3.       | 3.       | SV:Q45biii.TMJ: jaw joint or in front of ear, how many days pain or aching keep from doing usual activities (e.g., work, school...), past 30 days |
| 160 | P01TMJE30D | Num  | 8   | 3.       | 3.       | SV:Q45bi.TMJ: jaw joint or in front of ear, how many days had pain or aching, past 30 days                                                        |
| 158 | P01TMJE6M  | Num  | 8   | YNDK.    | 3.       | SV:Q45.TMJ: jaw joint or in front of ear, experienced pain or aching, past 6 months                                                               |
| 159 | P01TMJEPN1 | Num  | 8   | YNDK.    | 3.       | SV:Q45a.TMJ: jaw joint or in front of ear, first have pain or aching more than 6 months ago                                                       |
| 165 | P01TMJF30A | Num  | 8   | 3.       | 3.       | SV:Q46biii.TMJ: across face or cheek, how many days pain or aching keep from doing usual activities (e.g., work, school...), past 30 days         |
| 164 | P01TMJF30D | Num  | 8   | 3.       | 3.       | SV:Q46bi.TMJ: across face or cheek, how many days had pain or aching, past 30 days                                                                |
| 162 | P01TMJF6M  | Num  | 8   | YNDK.    | 3.       | SV:Q46.TMJ: across face or cheek, experienced pain or aching, past 6 months                                                                       |

## The CONTENTS Procedure

## Alphabetic List of Variables and Attributes

| #    | Variable   | Type | Len | Format    | Informat     | Label                                                                                                                                           |
|------|------------|------|-----|-----------|--------------|-------------------------------------------------------------------------------------------------------------------------------------------------|
| 163  | P01TMJFPN1 | Num  | 8   | YNDK.     | 3.           | SV:Q46a.TMJ: across face or cheek, first have pain or aching more than 6 months ago                                                             |
| 1042 | P01WEIGHT  | Num  | 8   |           |              | SV:Average current scale weight (kg) (calc)                                                                                                     |
| 53   | P01XRKOA   | Num  | 8   | KNEESF.   |              | SV:Baseline radiographic knee OA status by person (calc)                                                                                        |
| 1224 | P02ACTRISK | Num  | 8   | YNDK.     |              | IEI:Engage in at least one frequent knee bending activity (calc, used for study eligibility initially)                                          |
| 315  | P02CMDK    | Num  | 8   | YNDK.     | 3.           | IEI:Q20c.Doctor said cancer spread to other parts of body: don't know                                                                           |
| 314  | P02CMN     | Num  | 8   | YNDK.     | 5.           | IEI:Q20c.Doctor said cancer spread to other parts of body: no                                                                                   |
| 307  | P02CNC3    | Num  | 8   | YNDK.     | 2.           | IEI:Q20a.Cancer type: breast, self-reported                                                                                                     |
| 308  | P02CNC4    | Num  | 8   | YNDK.     | 2.           | IEI:Q20a.Cancer type: cervical, self-reported                                                                                                   |
| 309  | P02CNC13   | Num  | 8   | YNDK.     | 2.           | IEI:Q20a.Cancer type: prostate, self-reported                                                                                                   |
| 310  | P02CNC14   | Num  | 8   | YNDK.     | 2.           | IEI:Q20a.Cancer type: rectal, self-reported                                                                                                     |
| 311  | P02CNC15   | Num  | 8   | YNDK.     | 2.           | IEI:Q20a.Cancer type: skin, self-reported                                                                                                       |
| 606  | P02CNCOTH  | Num  | 8   | YNDK.     |              | IEI:Cancer type: colon, uterine and other, self-reported (calc)                                                                                 |
| 306  | P02CNCR3   | Num  | 8   | YNDK.     | 3.           | IEI:Q19.Treated for cancer or been told by doctor that you had cancer or malignant tumor, past 3 years                                          |
| 312  | P02CNMEL   | Num  | 8   | YNDK.     | 2.           | IEI:Q20a.Cancer type: nonmelanoma skin cancer, self-reported                                                                                    |
| 313  | P02CSY     | Num  | 8   | YNDK.     | 5.           | IEI:Q20b.Cancer removed by surgery: yes or watchful waiting for prostate cancer                                                                 |
| 1123 | P02DATE    | Num  | 8   | MMDDYY10. | DATETIME22.3 | IEI:Date Initial Eligibility Interview completed                                                                                                |
| 1222 | P02ELGRISK | Num  | 8   | RISKF.    |              | IEI:Knee symptoms, risk factors, or both, status at IEI/ SV (calc)                                                                              |
| 1129 | P02FAMHXKR | Num  | 8   | YNDK.     | 3.           | IEI:Q15.Mother, father, sister, or brother (blood relative) had knee repl surgery where all/ part of knee replaced (used for study eligibility) |
| 1132 | P02HR1     | Num  | 8   | YNDK.     | 2.           | IEI:Q42.How heard about OAI: brochure                                                                                                           |
| 1133 | P02HR2     | Num  | 8   | YNDK.     | 2.           | IEI:Q42.How heard about OAI: doctor                                                                                                             |
| 1134 | P02HR3     | Num  | 8   | YNDK.     | 2.           | IEI:Q42.How heard about OAI: flyer                                                                                                              |
| 1135 | P02HR4     | Num  | 8   | YNDK.     | 2.           | IEI:Q42.How heard about OAI: friend/ family                                                                                                     |
| 1136 | P02HR5     | Num  | 8   | YNDK.     | 2.           | IEI:Q42.How heard about OAI: mail                                                                                                               |
| 1137 | P02HR6     | Num  | 8   | YNDK.     | 2.           | IEI:Q42.How heard about OAI: newspaper                                                                                                          |

## The CONTENTS Procedure

## Alphabetic List of Variables and Attributes

| #    | Variable   | Type | Len | Format    | Informat | Label                                                                                                                                                     |
|------|------------|------|-----|-----------|----------|-----------------------------------------------------------------------------------------------------------------------------------------------------------|
| 1138 | P02HR7     | Num  | 8   | YNDK.     | 2.       | IEI:Q42.How heard about OAI: radio advertisement                                                                                                          |
| 1139 | P02HR8     | Num  | 8   | YNDK.     | 2.       | IEI:Q42.How heard about OAI: television                                                                                                                   |
| 1140 | P02HR9     | Num  | 8   | YNDK.     | 2.       | IEI:Q42.How heard about OAI: other                                                                                                                        |
| 1141 | P02HR10    | Num  | 8   | YNDK.     | 3.       | IEI:Q42.How heard about OAI: don't know/ don't remember                                                                                                   |
| 1142 | P02HR11    | Num  | 8   | YNDK.     | 3.       | IEI:Q42.How heard about OAI: refused                                                                                                                      |
| 1225 | P02IKPRISK | Num  | 8   | PAINFREQ. |          | IEI:Either knee symptom status at IEI (calc, used for study eligibility)                                                                                  |
| 1130 | P02JBMP    | Num  | 8   | YNDK.     | 3.       | IEI:Q16.Observe obvious hard bumps on joints closest to fingertips                                                                                        |
| 1191 | P02JBMPCV  | Num  | 8   | BUMP.     |          | IEI:Q16a.Hard bumps on fingers of right hand, left hand or both hands (calc, if=3 used for study eligibility)                                             |
| 304  | P02KINJ    | Num  | 8   | YNDK.     | 3.       | IEI:Q11.Either knee, ever injured so badly difficult to walk for at least one week (used for study eligibility)                                           |
| 303  | P02KPMED   | Num  | 8   | YNDK.     | 3.       | IEI:Q10.Either knee, used medication for pain, aching or stiffness, past 12 months                                                                        |
| 528  | P02KPMEDCV | Num  | 8   | YNDK.     |          | IEI:Q10a.Either knee, used medication for pain, aching or stiffness more than half the days of a month, past 12 months (calc, used for study eligibility) |
| 112  | P02KPN     | Num  | 8   | YNDK.     | 3.       | IEI:Q9.Either knee pain, aching or stiffness: any, past 12 months (used for study eligibility)                                                            |
| 255  | P02KPNLCV  | Num  | 8   | YNDK.     |          | IEI:Q9b.Left knee pain, aching or stiffness: more than half the days of a month, past 12 months (calc, used for study eligibility)                        |
| 254  | P02KPNRCV  | Num  | 8   | YNDK.     |          | IEI:Q9a.Right knee pain, aching or stiffness: more than half the days of a month, past 12 months (calc, used for study eligibility)                       |
| 1124 | P02KRS3    | Num  | 8   | YNDK.     | 3.       | IEI:Q13.Either knee, considering knee replacement surgery, next 3 years                                                                                   |
| 1190 | P02KRS3CV  | Num  | 8   | SURG.     |          | IEI:Q13a.Which knee considering having replaced, next 3 years (calc)                                                                                      |
| 529  | P02KRSCV   | Num  | 8   | SURG.     |          | IEI:Q12b.Which knee replaced during knee replacement surgery (calc)                                                                                       |
| 305  | P02KSURG   | Num  | 8   | YNDK.     | 3.       | IEI:Q12.Either knee, history of knee surgery (incl. arthroscopy, ligament repair, meniscectomy; used for study elig.)                                     |
| 594  | P02KSURGCV | Num  | 8   | YNDK.     |          | IEI:Q12a.Either knee, ever had knee replacement surgery where all or part of joint was replaced (calc)                                                    |

## The CONTENTS Procedure

## Alphabetic List of Variables and Attributes

| #    | Variable   | Type | Len | Format    | Informat | Label                                                                                                 |
|------|------------|------|-----|-----------|----------|-------------------------------------------------------------------------------------------------------|
| 1125 | P02PA1     | Num  | 8   | YNDK.     | 3.       | IEI:Q14a.Climb up total of 10 or more flights of stairs on most days                                  |
| 1126 | P02PA2     | Num  | 8   | YNDK.     | 3.       | IEI:Q14b.Kneel for 30 minutes or more on most days                                                    |
| 1127 | P02PA3     | Num  | 8   | YNDK.     | 3.       | IEI:Q14c.Squat or deep knee bend for 30 minutes or more on most days                                  |
| 1128 | P02PA4     | Num  | 8   | YNDK.     | 3.       | IEI:Q14d.Lift or move objects weighing 25 lbs. or more by hand on most days                           |
| 1131 | P02STMED   | Num  | 8   | YNDK.     | 3.       | IEI:Q23.Participating in any research study that includes taking medications or supplements           |
| 1218 | P02STMEDCV | Num  | 8   | STMED.    |          | IEI:Q23a.Told what study medications taken for research study (calc)                                  |
| 1189 | P02WTGA    | Num  | 8   | YNDK.     |          | IEI:Above weight cut- off for age/ gender group (calc, used for study eligibility)                    |
| 1067 | V0020MPACE | Num  | 8   | 6.3       |          | EV:20- meter walk: pace (m/ sec) (calc)                                                               |
| 1113 | V00400EXCL | Num  | 8   | EXCLUD.   |          | EV:400- meter walk: reason excluded (calc)                                                            |
| 1104 | V00400MCMP | Num  | 8   | PERFCOMP. |          | EV:400- meter walk: completion status (calc)                                                          |
| 1105 | V00400MTIM | Num  | 8   | 6.2       |          | EV:400- meter walk: total time at 400- m or at stop (sec) (calc)                                      |
| 1068 | V00400MTR  | Num  | 8   |           |          | EV:400- meter walk: total meters walked (calc)                                                        |
| 1110 | V00400PAIN | Num  | 8   | LRB.      |          | EV:400- meter walk: knee pain, which leg (calc)                                                       |
| 1056 | V00ABCIRC  | Num  | 8   | 5.1       |          | EV:Abdominal circumference (cm) (calc)                                                                |
| 909  | V00ACSTFID | Char | 4   | \$4.      | \$4.     | EV:Abdominal circumference: staff ID #                                                                |
| 507  | V00ACUSCUR | Num  | 8   | YNDK.     | 3.       | EV:Q59bii.CAM: currently seeing acupuncture practitioner for arthritis or joint pain                  |
| 563  | V00ACUSCV  | Num  | 8   | YNDK.     |          | EV:Q59b.CAM: seen acupuncture practitioner for arthritis or joint pain, past 12 months (calc)         |
| 506  | V00ACUSNUM | Num  | 8   | CAM.      | 3.       | EV:Q59bi.CAM: how many times see acupuncture practitioner for arthritis or joint pain, past 12 months |
| 505  | V00ACUTCUR | Num  | 8   | YNDK.     | 3.       | EV:Q59aii.CAM: currently seeing acupuncture practitioner for arthritis or joint pain                  |
| 562  | V00ACUTCV  | Num  | 8   | YNDK.     |          | EV:Q59a.CAM: seen acupuncture practitioner for arthritis or joint pain, past 12 months (calc)         |
| 504  | V00ACUTNUM | Num  | 8   | CAM.      | 3.       | EV:Q59ai.CAM: how many times see acupuncture practitioner for arthritis or joint pain, past 12 months |
| 1202 | V00AGE     | Num  | 8   |           |          | EV:Age (calc, used for study eligibility)                                                             |
| 402  | V00AMWHEN  | Num  | 8   | ASTHMA.   | 3.       | SAQ:Q21ai.Charlson Comorbidity: when usually take medicine for asthma                                 |

## The CONTENTS Procedure

## Alphabetic List of Variables and Attributes

| #   | Variable   | Type | Len | Format  | Informat | Label                                                                                                                                |
|-----|------------|------|-----|---------|----------|--------------------------------------------------------------------------------------------------------------------------------------|
| 793 | V00ANTOXC  | Num  | 8   | FFQ16X. |          | SAQ:Block Brief 2000: Antioxidant combination type multivitamins, how often past 12 months (calc)                                    |
| 400 | V00ASTHMA  | Num  | 8   | YNDK.   | 3.       | SAQ:Q21.Charlson Comorbidity: have asthma                                                                                            |
| 401 | V00ASTMEDS | Num  | 8   | YNDK.   | 3.       | SAQ:Q21a.Charlson Comorbidity: take medicines for asthma                                                                             |
| 843 | V00BAPCARB | Num  | 8   |         |          | SAQ:Block Brief 2000: daily % of calories from carbohydrate, alcoholic beverages excluded from denominator (kcal) (calc)             |
| 825 | V00BAPFAT  | Num  | 8   |         |          | SAQ:Block Brief 2000: daily % of calories from fat, alcoholic beverages excluded from denominator (kcal) (calc)                      |
| 842 | V00BAPPROT | Num  | 8   |         |          | SAQ:Block Brief 2000: daily % of calories from protein, alcoholic beverages excluded from denominator (kcal) (calc)                  |
| 795 | V00BCARCV  | Num  | 8   | FFQ16X. |          | SAQ:Block Brief 2000: Beta- carotene single vitamin, how often past 12 months (calc)                                                 |
| 500 | V00BISPHOS | Num  | 8   | YNDK.   | 3.       | EV:Q58.Taken bisphosphonate medication (includes alendronate, risedronate...) to treat osteoporosis or Paget's disease, past 5 years |
| 557 | V00BISPTYP | Num  | 8   | BISTYP. |          | EV:Type of bisphosphonate taken, past 5 years (calc)                                                                                 |
| 502 | V00BISPUSE | Num  | 8   | MEDDUR. | 3.       | EV:Q58b.Last time took bisphosphonate, past 5 years                                                                                  |
| 501 | V00BISPYRS | Num  | 8   | 3.      | 3.       | EV:Q58a.How many years take bisphosphonates                                                                                          |
| 96  | V00BLDCOLL | Num  | 8   | BSCOLL. |          | EV:Phlebotomy: which draw(s) blood obtained at (calc)                                                                                |
| 7   | V00BLDHRS1 | Num  | 8   |         |          | EV:Phlebotomy: time venipuncture completed (first draw, 24- hr time) (calc)                                                          |
| 8   | V00BLDHRS2 | Num  | 8   |         |          | EV:Phlebotomy: time venipuncture completed (repeat draw, 24- hr time) (calc)                                                         |
| 37  | V00BLDRAW1 | Num  | 8   | YNDK.   |          | EV:Phlebotomy: any blood drawn (first draw) (calc)                                                                                   |
| 38  | V00BLDRAW2 | Num  | 8   | YNDK.   |          | EV:Phlebotomy: any blood drawn (repeat draw) (calc)                                                                                  |
| 105 | V00BLSURD1 | Num  | 8   |         |          | EV:Phlebotomy: days between most recent surgery and blood draw (first draw) (calc)                                                   |
| 103 | V00BLSURD2 | Num  | 8   |         |          | EV:Phlebotomy: days between most recent surgery and blood draw (repeat draw) (calc)                                                  |
| 423 | V00BONEFX  | Num  | 8   | YNDK.   | 3.       | SAQ:Q30.Doctor ever said you broke or fractured bone after age 45                                                                    |
| 903 | V00BPARM   | Num  | 8   | LRB10X. | 2.       | EV:Q2.Blood pressure: what arm used to take measurement                                                                              |



## The CONTENTS Procedure

## Alphabetic List of Variables and Attributes

| #    | Variable   | Type | Len | Format   | Informat | Label                                                                                                                                                        |
|------|------------|------|-----|----------|----------|--------------------------------------------------------------------------------------------------------------------------------------------------------------|
| 902  | V00BPCFSZ  | Num  | 8   | SIZE8X.  | 2.       | EV:Q1.Blood pressure: what cuff size used                                                                                                                    |
| 906  | V00BPDIAS  | Num  | 8   | 4.       | 4.       | EV:Q6.Blood pressure: diastolic (mm Hg)                                                                                                                      |
| 901  | V00BPSTFID | Char | 4   | \$4.     | \$4.     | EV:Blood pressure: staff ID #                                                                                                                                |
| 905  | V00BPSYS   | Num  | 8   | 4.       | 4.       | EV:Q6.Blood pressure: systolic (mm Hg)                                                                                                                       |
| 904  | V00BPTERM  | Num  | 8   | YNDK.    | 2.       | EV:Q5.Blood pressure: was measurement terminated because MIL is >=300 mm Hg after second reading                                                             |
| 522  | V00BRAC12  | Num  | 8   | YNDK.    | 3.       | EV:Q64.CAM: worn copper bracelets or used magnets for arthritis or joint pain, past 12 months                                                                |
| 573  | V00BRACCV  | Num  | 8   | YNDK.    |          | EV:Q64a.CAM: currently wear copper bracelets or use magnets for arthritis or joint pain (calc)                                                               |
| 398  | V00BYPLEG  | Num  | 8   | YNDK.    | 3.       | SAQ:Q19.Charlson Comorbidity: had operation to unclog or bypass arteries in legs                                                                             |
| 798  | V00CALCMCV | Num  | 8   | FFQ16X.  |          | SAQ:Block Brief 2000: Calcium/ Tums (alone or combined with Vitamin D or magnesium), how often past 12 months (calc)                                         |
| 1100 | V00CALLDOC | Num  | 8   | YNDK.    | 3.       | EV:Q7.400- meter walk eligibility: had to see or call doctor for worsening angina (chest or heart pain) or worsening shortness of breath, past 3 months      |
| 503  | V00CAM12   | Num  | 8   | YNDK.    | 3.       | EV:Q59.CAM: seen someone other than medical doctor or nurse, such as chiropractor or acupuncturist, specifically for arthritis or joint pain, past 12 months |
| 422  | V00CANCER  | Num  | 8   | YNDK.    | 3.       | SAQ:Q29e.Charlson Comorbidity: have cancer, other than skin cancer, leukemia or lymphoma                                                                     |
| 988  | V00CANEUSE | Num  | 8   | YNDK.    | 2.       | EV:Q10.400- meter walk: use cane                                                                                                                             |
| 572  | V00CAPSNCV | Num  | 8   | YNDK.    |          | EV:Q63b.CAM: currently using Capsaicin (pepper cream) for arthritis or joint pain (calc)                                                                     |
| 1209 | V00CEMPLOY | Num  | 8   | EMPLOY.  |          | EV:Current employment (calc)                                                                                                                                 |
| 552  | V00CESD    | Num  | 8   |          |          | SAQ:CES- D: Center for Epidemiologic Studies Depression Scale (CES- D) Score (calc)                                                                          |
| 458  | V00CESD1   | Num  | 8   | TIME6AX. | 3.       | SAQ:Q43a.CES- D: how often bothered by things that usually don't bother, past week                                                                           |
| 459  | V00CESD2   | Num  | 8   | TIME6AX. | 3.       | SAQ:Q43b.CES- D: how often did not feel like eating, appetite was poor, past week                                                                            |
| 460  | V00CESD3   | Num  | 8   | TIME6AX. | 3.       | SAQ:Q43c.CES- D: how often felt could not shake off the blues even with help from family and friends, past week                                              |
| 461  | V00CESD4   | Num  | 8   | TIME6AX. | 3.       | SAQ:Q43d.CES- D: how often felt just as good as other people, past week                                                                                      |

## The CONTENTS Procedure

## Alphabetic List of Variables and Attributes

| #   | Variable   | Type | Len | Format   | Informat | Label                                                                                                       |
|-----|------------|------|-----|----------|----------|-------------------------------------------------------------------------------------------------------------|
| 462 | V00CESD5   | Num  | 8   | TIME6AX. | 3.       | SAQ:Q43e.CES- D: how often had trouble keeping mind on what was doing, past week                            |
| 463 | V00CESD6   | Num  | 8   | TIME6AX. | 3.       | SAQ:Q43f.CES- D: how often felt depressed, past week                                                        |
| 464 | V00CESD7   | Num  | 8   | TIME6AX. | 3.       | SAQ:Q43g.CES- D: how often felt that everything did was an effort, past week                                |
| 465 | V00CESD8   | Num  | 8   | TIME6AX. | 3.       | SAQ:Q43h.CES- D: how often felt hopeful about the future, past week                                         |
| 466 | V00CESD9   | Num  | 8   | TIME6AX. | 3.       | SAQ:Q43i.CES- D: how often thought my life had been a failure, past week                                    |
| 467 | V00CESD10  | Num  | 8   | TIME6AX. | 3.       | SAQ:Q43j.CES- D: how often felt fearful, past week                                                          |
| 468 | V00CESD11  | Num  | 8   | TIME6AX. | 3.       | SAQ:Q43k.CES- D: how often sleep was restless, past week                                                    |
| 469 | V00CESD12  | Num  | 8   | TIME6AX. | 3.       | SAQ:Q43l.CES- D: how often was happy, past week                                                             |
| 470 | V00CESD13  | Num  | 8   | TIME6AX. | 3.       | SAQ:Q43m.CES- D: how often talked less than usual, past week                                                |
| 471 | V00CESD14  | Num  | 8   | TIME6AX. | 3.       | SAQ:Q43n.CES- D: how often felt lonely, past week                                                           |
| 472 | V00CESD15  | Num  | 8   | TIME6AX. | 3.       | SAQ:Q43o.CES- D: how often felt people were unfriendly, past week                                           |
| 473 | V00CESD16  | Num  | 8   | TIME6AX. | 3.       | SAQ:Q43p.CES- D: how often enjoyed life, past week                                                          |
| 474 | V00CESD17  | Num  | 8   | TIME6AX. | 3.       | SAQ:Q43q.CES- D: how often had crying spells, past week                                                     |
| 475 | V00CESD18  | Num  | 8   | TIME6AX. | 3.       | SAQ:Q43r.CES- D: how often felt sad, past week                                                              |
| 476 | V00CESD19  | Num  | 8   | TIME6AX. | 3.       | SAQ:Q43s.CES- D: how often felt that people disliked me, past week                                          |
| 477 | V00CESD20  | Num  | 8   | TIME6AX. | 3.       | SAQ:Q43t.CES- D: how often could not get going, past week                                                   |
| 508 | V00CHELCUR | Num  | 8   | YNDK.    | 3.       | EV:Q59eii.CAM: currently seeing chelation therapy practitioner for arthritis or joint pain                  |
| 564 | V00CHELCV  | Num  | 8   | YNDK.    |          | EV:Q59e.CAM: seen chelation therapy practitioner for arthritis or joint pain, past 12 months (calc)         |
| 509 | V00CHELNUM | Num  | 8   | CAM.     | 3.       | EV:Q59ei.CAM: how many times see chelation therapy practitioner for arthritis or joint pain, past 12 months |
| 511 | V00CHIRCUR | Num  | 8   | YNDK.    | 3.       | EV:Q59fii.CAM: currently seeing chiropractic care practitioner for arthritis or joint pain                  |
| 565 | V00CHIRCV  | Num  | 8   | YNDK.    |          | EV:Q59f.CAM: seen chiropractic care practitioner for arthritis or joint pain, past 12 months (calc)         |
| 510 | V00CHIRNUM | Num  | 8   | CAM.     | 3.       | EV:Q59fi.CAM: how many times see chiropractic care practitioner for arthritis or joint pain, past 12 months |

## The CONTENTS Procedure

## Alphabetic List of Variables and Attributes

| #    | Variable   | Type | Len | Format   | Informat | Label                                                                                                                                  |
|------|------------|------|-----|----------|----------|----------------------------------------------------------------------------------------------------------------------------------------|
| 558  | V00CHNFQCV | Num  | 8   | FREQ3X.  |          | EV:Q52ai.Chondroitin sulfate frequency of use, past 6 months (calc)                                                                    |
| 487  | V00CHON    | Num  | 8   | YNDK.    | 3.       | EV:Q52a.Used chondroitin sulfate for joint pain or arthritis, past 6 months                                                            |
| 111  | V00CITRATE | Num  | 8   | BSCOLL.  |          | EV:Phlebotomy: which draw(s) citrate obtained at (calc)                                                                                |
| 542  | V00COMORB  | Num  | 8   |          |          | SAQ:Comorbidity Score (calc)                                                                                                           |
| 989  | V00COMP10  | Num  | 8   | YNDK.    | 2.       | EV:Q11.400- meter walk: complete full 10 laps                                                                                          |
| 481  | V00COXIBS  | Num  | 8   | YNDK.    | 3.       | EV:Q50d.Used COXIBS (e.g., Bextra, Celebrex...) for joint pain or arthritis more than half the days of the month, past 30 days         |
| 1057 | V00CS5     | Num  | 8   | YNDK.    |          | EV:Repeated chair stands: able to complete 5 stands (calc)                                                                             |
| 1058 | V00CSPACE  | Num  | 8   |          |          | EV WBK:Repeated chair stand: pace in stands/ sec (calc)                                                                                |
| 915  | V00CSTIME1 | Num  | 8   | 6.2      | 6.2      | EV:Repeated chair stands: trial 1 time (sec.hundredths/ sec)                                                                           |
| 918  | V00CSTIME2 | Num  | 8   | 6.2      | 6.2      | EV:Repeated chair stands: trial 2 time (sec.hundredths/ sec)                                                                           |
| 916  | V00CSTNUM1 | Num  | 8   | CHAIR4X. | 2.       | EV:Repeated chair stands: trial 1, number completed without using arms                                                                 |
| 919  | V00CSTNUM2 | Num  | 8   | CHAIR4X. | 2.       | EV:Repeated chair stands: trial 2, number completed without using arms                                                                 |
| 914  | V00CSTREP1 | Num  | 8   | CHAIR5X. | 3.       | EV:Repeated chair stands: trial 1                                                                                                      |
| 917  | V00CSTREP2 | Num  | 8   | CHAIR5X. | 3.       | EV:Repeated chair stands: trial 2                                                                                                      |
| 912  | V00CSTSGL  | Num  | 8   | STAND4X. | 3.       | EV:Single chair stand                                                                                                                  |
| 1185 | V00CUREMP  | Num  | 8   | YNDK.    | 3.       | EV:Q45.Currently work for pay (include self employed work for pay; answer Yes if on leave from work, expect to return within 6 months) |
| 408  | V00DIAB    | Num  | 8   | YNDK.    | 3.       | SAQ:Q24.Charlson Comorbidity: have diabetes (high blood sugar)                                                                         |
| 413  | V00DIABPR1 | Num  | 8   | YNDK.    | 2.       | SAQ:Q24b.Charlson Comorbidity: diabetes caused problems with kidneys                                                                   |
| 414  | V00DIABPR2 | Num  | 8   | YNDK.    | 2.       | SAQ:Q24b.Charlson Comorbidity: diabetes caused problems with eyes, treated by ophthalmologist                                          |
| 415  | V00DIABPR3 | Num  | 8   | YNDK.    | 2.       | SAQ:Q24b.Charlson Comorbidity: diabetes has not caused problems                                                                        |
| 409  | V00DIABTX1 | Num  | 8   | YNDK.    | 2.       | SAQ:Q24a.Charlson Comorbidity: diabetes treated by modifying diet                                                                      |
| 410  | V00DIABTX2 | Num  | 8   | YNDK.    | 2.       | SAQ:Q24a.Charlson Comorbidity: diabetes treated with medications taken by mouth                                                        |

## The CONTENTS Procedure

## Alphabetic List of Variables and Attributes

| #    | Variable   | Type | Len | Format  | Informat | Label                                                                                                                            |
|------|------------|------|-----|---------|----------|----------------------------------------------------------------------------------------------------------------------------------|
| 411  | V00DIABTX3 | Num  | 8   | YNDK.   | 2.       | SAQ:Q24a.Charlson Comorbidity: diabetes treated with insulin injections                                                          |
| 412  | V00DIABTX4 | Num  | 8   | YNDK.   | 2.       | SAQ:Q24a.Charlson Comorbidity: diabetes not treated/ watchful waiting                                                            |
| 1103 | V00DIASELG | Num  | 8   | EXCL.   |          | EV:400- meter walk eligibility: meets new or old diastolic blood pressure exclusion criterion (calc)                             |
| 518  | V00DIET12  | Num  | 8   | YNDK.   | 3.       | EV:Q60.CAM: follow special food plan or diet, such as a vegetarian or low- fat diet, for arthritis or joint pain, past 12 months |
| 569  | V00DIETCV  | Num  | 8   | YNDK.   |          | EV:Q60a.CAM: currently following special food plan or diet for arthritis or joint pain (calc)                                    |
| 227  | V00DILKN1  | Num  | 8   | PAIN1Z. | 3.       | EV:Left knee difficulty: down stairs, last 7 days                                                                                |
| 228  | V00DILKN2  | Num  | 8   | PAIN1Z. | 3.       | EV:Left knee difficulty: up stairs, last 7 days                                                                                  |
| 229  | V00DILKN3  | Num  | 8   | PAIN1Z. | 3.       | EV:Left knee difficulty: stand from sitting, last 7 days                                                                         |
| 230  | V00DILKN4  | Num  | 8   | PAIN1Z. | 3.       | EV:Left knee difficulty: standing, last 7 days                                                                                   |
| 231  | V00DILKN5  | Num  | 8   | PAIN1Z. | 3.       | EV:Left knee difficulty: bending, last 7 days                                                                                    |
| 232  | V00DILKN6  | Num  | 8   | PAIN1Z. | 3.       | EV:Left knee difficulty: walking, last 7 days                                                                                    |
| 233  | V00DILKN7  | Num  | 8   | PAIN1Z. | 3.       | EV:Left knee difficulty: in car/ out of car, last 7 days                                                                         |
| 234  | V00DILKN8  | Num  | 8   | PAIN1Z. | 3.       | EV:Left knee difficulty: shopping, last 7 days                                                                                   |
| 235  | V00DILKN9  | Num  | 8   | PAIN1Z. | 3.       | EV:Left knee difficulty: socks on, last 7 days                                                                                   |
| 236  | V00DILKN10 | Num  | 8   | PAIN1Z. | 3.       | EV:Left knee difficulty: get out of bed, last 7 days                                                                             |
| 237  | V00DILKN11 | Num  | 8   | PAIN1Z. | 3.       | EV:Left knee difficulty: socks off, last 7 days                                                                                  |
| 238  | V00DILKN12 | Num  | 8   | PAIN1Z. | 3.       | EV:Left knee difficulty: lying down, last 7 days                                                                                 |
| 239  | V00DILKN13 | Num  | 8   | PAIN1Z. | 3.       | EV:Left knee difficulty: get in/ out of bathtub, last 7 days                                                                     |
| 240  | V00DILKN14 | Num  | 8   | PAIN1Z. | 3.       | EV:Left knee difficulty: sitting, last 7 days                                                                                    |
| 241  | V00DILKN15 | Num  | 8   | PAIN1Z. | 3.       | EV:Left knee difficulty: on/ off toilet, last 7 days                                                                             |
| 242  | V00DILKN16 | Num  | 8   | PAIN1Z. | 3.       | EV:Left knee difficulty: heavy chores, last 7 days                                                                               |
| 243  | V00DILKN17 | Num  | 8   | PAIN1Z. | 3.       | EV:Left knee difficulty: light chores, last 7 days                                                                               |
| 194  | V00DIRKN1  | Num  | 8   | PAIN1Z. | 3.       | EV:Right knee difficulty: down stairs, last 7 days                                                                               |
| 195  | V00DIRKN2  | Num  | 8   | PAIN1Z. | 3.       | EV:Right knee difficulty: up stairs, last 7 days                                                                                 |
| 196  | V00DIRKN3  | Num  | 8   | PAIN1Z. | 3.       | EV:Right knee difficulty: stand from sitting, last 7 days                                                                        |
| 197  | V00DIRKN4  | Num  | 8   | PAIN1Z. | 3.       | EV:Right knee difficulty: standing, last 7 days                                                                                  |
| 198  | V00DIRKN5  | Num  | 8   | PAIN1Z. | 3.       | EV:Right knee difficulty: bending, last 7 days                                                                                   |

## The CONTENTS Procedure

## Alphabetic List of Variables and Attributes

| #    | Variable   | Type | Len | Format    | Informat | Label                                                                                                                                           |
|------|------------|------|-----|-----------|----------|-------------------------------------------------------------------------------------------------------------------------------------------------|
| 199  | V00DIRKN6  | Num  | 8   | PAIN1Z.   | 3.       | EV:Right knee difficulty: walking, last 7 days                                                                                                  |
| 200  | V00DIRKN7  | Num  | 8   | PAIN1Z.   | 3.       | EV:Right knee difficulty: in car/ out of car, last 7 days                                                                                       |
| 201  | V00DIRKN8  | Num  | 8   | PAIN1Z.   | 3.       | EV:Right knee difficulty: shopping, last 7 days                                                                                                 |
| 202  | V00DIRKN9  | Num  | 8   | PAIN1Z.   | 3.       | EV:Right knee difficulty: socks on, last 7 days                                                                                                 |
| 203  | V00DIRKN10 | Num  | 8   | PAIN1Z.   | 3.       | EV:Right knee difficulty: get out of bed, last 7 days                                                                                           |
| 204  | V00DIRKN11 | Num  | 8   | PAIN1Z.   | 3.       | EV:Right knee difficulty: socks off, last 7 days                                                                                                |
| 205  | V00DIRKN12 | Num  | 8   | PAIN1Z.   | 3.       | EV:Right knee difficulty: lying down, last 7 days                                                                                               |
| 206  | V00DIRKN13 | Num  | 8   | PAIN1Z.   | 3.       | EV:Right knee difficulty: get in/ out of bathtub, last 7 days                                                                                   |
| 207  | V00DIRKN14 | Num  | 8   | PAIN1Z.   | 3.       | EV:Right knee difficulty: sitting, last 7 days                                                                                                  |
| 208  | V00DIRKN15 | Num  | 8   | PAIN1Z.   | 3.       | EV:Right knee difficulty: on/ off toilet, last 7 days                                                                                           |
| 209  | V00DIRKN16 | Num  | 8   | PAIN1Z.   | 3.       | EV:Right knee difficulty: heavy chores, last 7 days                                                                                             |
| 210  | V00DIRKN17 | Num  | 8   | PAIN1Z.   | 3.       | EV:Right knee difficulty: light chores, last 7 days                                                                                             |
| 1006 | V00DISCOMF | Num  | 8   | YNDK.     | 2.       | EV:Q12.400- meter walk: any discomfort                                                                                                          |
| 1018 | V00DKP400W | Num  | 8   | YNDK.     | 3.       | EV:Q13.400- meter walk: knee pain during walk, don't know                                                                                       |
| 485  | V00DOXYCYC | Num  | 8   | YNDK.     | 3.       | EV:Q50h.Used Doxycycline (includes Vibra- Tabs, Doryx, Adoxa...) for joint pain or arthritis more than half the days of the month, past 30 days |
| 457  | V00DRKMORE | Num  | 8   | YNDK.     | 3.       | SAQ:Q42.Ever drink more beer, wine or liquor than do now                                                                                        |
| 456  | V00DRNKAMT | Num  | 8   | ALCOHOLA. | 3.       | SAQ:Q41.How many alcoholic drinks in typical week, past 12 months                                                                               |
| 828  | V00DTACAR  | Num  | 8   |           |          | SAQ:Block Brief 2000: daily nutrients from food, alpha- carotene (ug) (calc)                                                                    |
| 810  | V00DTAIU   | Num  | 8   |           |          | SAQ:Block Brief 2000: daily nutrients from food, vitamin A (IU) (calc)                                                                          |
| 823  | V00DTANZN  | Num  | 8   |           |          | SAQ:Block Brief 2000: daily nutrients from food, zinc from animal sources (mg) (calc)                                                           |
| 850  | V00DTARE   | Num  | 8   |           |          | SAQ:Block Brief 2000: daily nutrients from food, vitamin A (RE) (calc)                                                                          |
| 815  | V00DTB1    | Num  | 8   |           |          | SAQ:Block Brief 2000: daily nutrients from food, thiamin (B1) (mg) (calc)                                                                       |
| 871  | V00DTB6    | Num  | 8   |           |          | SAQ:Block Brief 2000: daily nutrients from food, vitamin B6 (mg) (calc)                                                                         |
| 856  | V00DTB12   | Num  | 8   |           |          | SAQ:Block Brief 2000: daily nutrients from food, vitamin B12 (ug) (calc)                                                                        |

**The CONTENTS Procedure**


---

| Alphabetic List of Variables and Attributes |            |      |     |        |          |
|---------------------------------------------|------------|------|-----|--------|----------|
| #                                           | Variable   | Type | Len | Format | Informat |
| 833                                         | V00DTBCAR  | Num  | 8   |        |          |
| 808                                         | V00DTCAFFN | Num  | 8   |        |          |
| 861                                         | V00DTCALC  | Num  | 8   |        |          |
| 878                                         | V00DTCARB  | Num  | 8   |        |          |
| 811                                         | V00DTCHOL  | Num  | 8   |        |          |
| 886                                         | V00DTCRYP  | Num  | 8   |        |          |
| 867                                         | V00DTCYST  | Num  | 8   |        |          |
| 863                                         | V00DTDAID  | Num  | 8   |        |          |
| 804                                         | V00DTDFIB  | Num  | 8   |        |          |
| 852                                         | V00DTFAT   | Num  | 8   |        |          |
| 865                                         | V00DTFE    | Num  | 8   |        |          |
| 880                                         | V00DTFOL   | Num  | 8   |        |          |
| 857                                         | V00DTGEN   | Num  | 8   |        |          |
| 841                                         | V00DTKCAL  | Num  | 8   |        |          |
| 881                                         | V00DTLIN   | Num  | 8   |        |          |
| 824                                         | V00DTLUT   | Num  | 8   |        |          |
| 851                                         | V00DTLYC   | Num  | 8   |        |          |
| 858                                         | V00DTMETH  | Num  | 8   |        |          |
| 874                                         | V00DTMG    | Num  | 8   |        |          |
| 849                                         | V00DTNA    | Num  | 8   |        |          |
| 847                                         | V00DTNIAC  | Num  | 8   |        |          |
| 839                                         | V00DTOLEC  | Num  | 8   |        |          |
| 813                                         | V00DTPHOS  | Num  | 8   |        |          |
| 836                                         | V00DTPOTA  | Num  | 8   |        |          |
| 877                                         | V00DTPROA  | Num  | 8   |        |          |
| 834                                         | V00DTPROT  | Num  | 8   |        |          |
| 820                                         | V00DTRET   | Num  | 8   |        |          |
| 888                                         | V00DTRIBO  | Num  | 8   |        |          |
| 868                                         | V00DTSF    | Num  | 8   |        |          |
| 837                                         | V00DTSFAT  | Num  | 8   |        |          |
| 814                                         | V00DTVITC  | Num  | 8   |        |          |
| 876                                         | V00DTVITD  | Num  | 8   |        |          |
| 883                                         | V00DTVITE  | Num  | 8   |        |          |

---

**The CONTENTS Procedure**

## Alphabetic List of Variables and Attributes

| #   | Label                                                                                           |
|-----|-------------------------------------------------------------------------------------------------|
| 833 | SAQ:Block Brief 2000: daily nutrients from food, beta- carotene (ug) (calc)                     |
| 808 | SAQ:Block Brief 2000: daily nutrients from food, caffeine (mg) (calc)                           |
| 861 | SAQ:Block Brief 2000: daily nutrients from food, calcium (mg) (calc)                            |
| 878 | SAQ:Block Brief 2000: daily nutrients from food, carbohydrate (g) (calc)                        |
| 811 | SAQ:Block Brief 2000: daily nutrients from food, cholesterol (mg) (calc)                        |
| 886 | SAQ:Block Brief 2000: daily nutrients from food, cryptoxanthin (carotenoid) (ug) (calc)         |
| 867 | SAQ:Block Brief 2000: daily nutrients from food, cysteine (mg) (calc)                           |
| 863 | SAQ:Block Brief 2000: daily nutrients from food, daidzein (ug) (calc)                           |
| 804 | SAQ:Block Brief 2000: daily nutrients from food, total dietary fiber (g) (calc)                 |
| 852 | SAQ:Block Brief 2000: daily nutrients from food, total fat (g) (calc)                           |
| 865 | SAQ:Block Brief 2000: daily nutrients from food, iron (mg) (calc)                               |
| 880 | SAQ:Block Brief 2000: daily nutrients from food, folate (mcg) (calc)                            |
| 857 | SAQ:Block Brief 2000: daily nutrients from food, genistein (ug) (calc)                          |
| 841 | SAQ:Block Brief 2000: daily nutrients from food, calories (Kcal) (calc)                         |
| 881 | SAQ:Block Brief 2000: daily nutrients from food, polyunsaturated fat (g) (calc)                 |
| 824 | SAQ:Block Brief 2000: daily nutrients from food, lutein (carotenoid) (ug) (calc)                |
| 851 | SAQ:Block Brief 2000: daily nutrients from food, lycopene (carotenoid) (ug) (calc)              |
| 858 | SAQ:Block Brief 2000: daily nutrients from food, methionine (mg) (calc)                         |
| 874 | SAQ:Block Brief 2000: daily nutrients from food, magnesium (mg) (calc)                          |
| 849 | SAQ:Block Brief 2000: daily nutrients from food, sodium (mg) (calc)                             |
| 847 | SAQ:Block Brief 2000: daily nutrients from food, niacin (mg) (calc)                             |
| 839 | SAQ:Block Brief 2000: daily nutrients from food, monounsaturated fat (g) (calc)                 |
| 813 | SAQ:Block Brief 2000: daily nutrients from food, phosphorus (mg) (calc)                         |
| 836 | SAQ:Block Brief 2000: daily nutrients from food, potassium (mg) (calc)                          |
| 877 | SAQ:Block Brief 2000: daily nutrients from food, carotene, provitamin A carotenoids (ug) (calc) |
| 834 | SAQ:Block Brief 2000: daily nutrients from food, protein (g) (calc)                             |
| 820 | SAQ:Block Brief 2000: daily nutrients from food, retinol (preformed Vit. A, ug) (calc)          |
| 888 | SAQ:Block Brief 2000: daily nutrients from food, riboflavin (B2) (mg) (calc)                    |
| 868 | SAQ:Block Brief 2000: grams of solid food (g), per week (calc)                                  |
| 837 | SAQ:Block Brief 2000: daily nutrients from food, saturated fat (g) (calc)                       |
| 814 | SAQ:Block Brief 2000: daily nutrients from food, vitamin C (mg) (calc)                          |
| 876 | SAQ:Block Brief 2000: daily nutrients from food, vitamin D (IU) (calc)                          |
| 883 | SAQ:Block Brief 2000: daily nutrients from food, vitamin E a- TE (calc)                         |

## The CONTENTS Procedure

| Alphabetic List of Variables and Attributes |            |      |     |           |              |
|---------------------------------------------|------------|------|-----|-----------|--------------|
| #                                           | Variable   | Type | Len | Format    | Informat     |
| 819                                         | V00DTVITK  | Num  | 8   |           |              |
| 890                                         | V00DTZINC  | Num  | 8   |           |              |
| 1220                                        | V00EDCV    | Num  | 8   | GRADECV.  |              |
| 110                                         | V00EDTA    | Num  | 8   | BSCOLL.   |              |
| 941                                         | V00EKRSL   | Num  | 8   | YNDK.     | 2.           |
| 921                                         | V00EKRSR   | Num  | 8   | YNDK.     | 2.           |
| 1210                                        | V00ENRCR1  | Num  | 8   | YNDK.     | 2.           |
| 1211                                        | V00ENRCR2  | Num  | 8   | YNDK.     | 2.           |
| 1212                                        | V00ENRCR3  | Num  | 8   | YNDK.     | 2.           |
| 1213                                        | V00ENRCR4  | Num  | 8   | YNDK.     | 2.           |
| 1214                                        | V00ENRCR5  | Num  | 8   | YNDK.     | 2.           |
| 1215                                        | V00ENRCR6  | Num  | 8   | YNDK.     | 2.           |
| 1216                                        | V00ENREXCP | Num  | 8   | YNDK.     |              |
| 494                                         | V00ESTR    | Num  | 8   | YNDK.     | 3.           |
| 495                                         | V00ESTRUSE | Num  | 8   | MEDDUR2X. | 3.           |
| 1158                                        | V00EVDATE  | Num  | 8   | MMDDYY10. | DATETIME22.3 |
| 31                                          | V00EXCESS1 | Num  | 8   | YNDK.     |              |
| 32                                          | V00EXCESS2 | Num  | 8   | YNDK.     |              |
| 428                                         | V00FALL    | Num  | 8   | YNDK.     | 3.           |
| 543                                         | V00FALLCV  | Num  | 8   | RATE2XA.  |              |
| 613                                         | V00FFQ1    | Num  | 8   | FFQ1Z.    | 3.           |
| 615                                         | V00FFQ2    | Num  | 8   | FFQ1Z.    | 3.           |
| 617                                         | V00FFQ3    | Num  | 8   | FFQ1Z.    | 3.           |
| 619                                         | V00FFQ4    | Num  | 8   | FFQ1Z.    | 3.           |
| 621                                         | V00FFQ5    | Num  | 8   | FFQ9Z.    | 3.           |
| 622                                         | V00FFQ6    | Num  | 8   | FFQ1Z.    | 3.           |
| 624                                         | V00FFQ7    | Num  | 8   | FFQ1Z.    | 3.           |
| 626                                         | V00FFQ8    | Num  | 8   | FFQ1Z.    | 3.           |



## The CONTENTS Procedure

---

### Alphabetic List of Variables and Attributes

| #    | Label                                                                                                                                                         |
|------|---------------------------------------------------------------------------------------------------------------------------------------------------------------|
| 819  | SAQ:Block Brief 2000: daily nutrients from food, vitamin K (ug) (calc)                                                                                        |
| 890  | SAQ:Block Brief 2000: daily nutrients from food, zinc (mg) (calc)                                                                                             |
| 1220 | SAQ:Q6.Highest grade or year of school completed (calc)                                                                                                       |
| 110  | EV:Phlebotomy: which draw(s) EDTA obtained at (calc)                                                                                                          |
| 941  | EV:Q12.Isometric strength: left knee, ever had knee replacement surgery                                                                                       |
| 921  | EV:Q2.Isometric strength: right knee, ever had knee replacement surgery                                                                                       |
| 1210 | Enr Expn:Q1.Exception to eligibility criteria, no acceptable screening knee x-ray, can be for cohort assignment only                                          |
| 1211 | Enr Expn:Q1.Exception to eligibility criteria, minimum MRI requirements for enrollment not met                                                                |
| 1212 | Enr Expn:Q1.Exception to eligibility criteria, minimum blood collection requirements for enrollment not met                                                   |
| 1213 | Enr Expn:Q1.Exception to eligibility criteria, minimum urine collection requirements for enrollment not met                                                   |
| 1214 | Enr Expn:Q1.Exception to eligibility criteria, minimum baseline requirements met but outside of designated window                                             |
| 1215 | Enr Expn:Q1.Exception to eligibility criteria, did not fulfill risk-factor eligibility criteria for assigned cohort                                           |
| 1216 | Enr Expn:Participant has enrollment exception (calc)                                                                                                          |
| 494  | EV:Q55.Used Estratest or Syntest, a combination of estrogen and testosterone, for menopausal symptoms or to increase bone density (women only), past 6 months |
| 495  | EV:Q55a.Last time used Estratest or Syntest (women only), past 6 months                                                                                       |
| 1158 | EV:Date Enrollment Visit completed                                                                                                                            |
| 31   | EV:Phlebotomy: traumatic venipuncture, excessive duration of draw (first draw) (calc)                                                                         |
| 32   | EV:Phlebotomy: traumatic venipuncture, excessive duration of draw (repeat draw) (calc)                                                                        |
| 428  | SAQ:Q32.Fallen and landed on floor or ground, past 12 months                                                                                                  |
| 543  | SAQ:Q32a.How many times fallen, past 12 months (calc)                                                                                                         |
| 613  | SAQ:Block Brief 2000: eggs (include egg biscuits/ Egg McMuffins (not egg substitutes)), eat how often, past 12 months                                         |
| 615  | SAQ:Block Brief 2000: bacon/ breakfast sausage (including sausage biscuit), eat how often, past 12 months                                                     |
| 617  | SAQ:Block Brief 2000: cooked cereals (e.g., oatmeal/ cream of wheat/ grits) eat how often, past 12 months                                                     |
| 619  | SAQ:Block Brief 2000: cold cereals (e.g., Corn Flakes/ Cheerios...), eat how often, past 12 months                                                            |
| 621  | SAQ:Block Brief 2000: cereal, which eat most often                                                                                                            |
| 622  | SAQ:Block Brief 2000: cheese/ sliced cheese/ cheese spread (including on sandwiches), eat how often, past 12 months                                           |
| 624  | SAQ:Block Brief 2000: yogurt (not frozen yogurt), eat how often, past 12 months                                                                               |
| 626  | SAQ:Block Brief 2000: bananas, eat how often, past 12 months                                                                                                  |

---

## The CONTENTS Procedure

## Alphabetic List of Variables and Attributes

| #   | Variable | Type | Len | Format | Informat | Label                                                                                                                         |
|-----|----------|------|-----|--------|----------|-------------------------------------------------------------------------------------------------------------------------------|
| 628 | V00FFQ9  | Num  | 8   | FFQ1Z. | 3.       | SAQ:Block Brief 2000: apples/ pears, eat how often, past 12 months                                                            |
| 630 | V00FFQ10 | Num  | 8   | FFQ1Z. | 3.       | SAQ:Block Brief 2000: oranges/ tangerines (not including juice), eat how often, past 12 months                                |
| 632 | V00FFQ11 | Num  | 8   | FFQ1Z. | 3.       | SAQ:Block Brief 2000: applesauce/ fruit cocktail/ any canned fruit, eat how often, past 12 months                             |
| 634 | V00FFQ12 | Num  | 8   | FFQ1Z. | 3.       | SAQ:Block Brief 2000: any other fruit (e.g., grapes/ melon/ strawberries/ peaches), eat how often, past 12 months             |
| 636 | V00FFQ13 | Num  | 8   | FFQ1Z. | 3.       | SAQ:Block Brief 2000: french fries/ fried potatoes/ hash browns, eat how often, past 12 months                                |
| 638 | V00FFQ14 | Num  | 8   | FFQ1Z. | 3.       | SAQ:Block Brief 2000: white potatoes not fried (including boiled/ baked/ mashed/ potato salad), eat how often, past 12 months |
| 640 | V00FFQ15 | Num  | 8   | FFQ1Z. | 3.       | SAQ:Block Brief 2000: sweet potatoes/ yams/ sweet potato pie, eat how often, past 12 months                                   |
| 642 | V00FFQ16 | Num  | 8   | FFQ1Z. | 3.       | SAQ:Block Brief 2000: rice/ dishes made with rice, eat how often, past 12 months                                              |
| 644 | V00FFQ17 | Num  | 8   | FFQ1Z. | 3.       | SAQ:Block Brief 2000: baked beans/ chili with beans/ pintos/ any other dried beans, eat how often, during past 12 months      |
| 646 | V00FFQ18 | Num  | 8   | FFQ1Z. | 3.       | SAQ:Block Brief 2000: refried beans, eat how often, past 12 months                                                            |
| 648 | V00FFQ19 | Num  | 8   | FFQ1Z. | 3.       | SAQ:Block Brief 2000: green beans/ green peas, eat how often, past 12 months                                                  |
| 650 | V00FFQ20 | Num  | 8   | FFQ1Z. | 3.       | SAQ:Block Brief 2000: broccoli, eat how often, past 12 months                                                                 |
| 652 | V00FFQ21 | Num  | 8   | FFQ1Z. | 3.       | SAQ:Block Brief 2000: carrots/ stews or mixed vegetables containing carrots, eat how often, past 12 months                    |
| 654 | V00FFQ22 | Num  | 8   | FFQ1Z. | 3.       | SAQ:Block Brief 2000: spinach/ greens (e.g., collards), eat how often, past 12 months                                         |
| 656 | V00FFQ23 | Num  | 8   | FFQ1Z. | 3.       | SAQ:Block Brief 2000: cole slaw/ cabbage, eat how often, past 12 months                                                       |
| 658 | V00FFQ24 | Num  | 8   | FFQ1Z. | 3.       | SAQ:Block Brief 2000: green salad, eat how often, past 12 months                                                              |
| 660 | V00FFQ25 | Num  | 8   | FFQ1Z. | 3.       | SAQ:Block Brief 2000: raw tomatoes (including in salad), eat how often, past 12 months                                        |
| 662 | V00FFQ26 | Num  | 8   | FFQ1Z. | 3.       | SAQ:Block Brief 2000: catsup/ salsa/ chile peppers, eat how often, past 12 months                                             |
| 664 | V00FFQ27 | Num  | 8   | FFQ1Z. | 3.       | SAQ:Block Brief 2000: salad dressing/ mayonnaise (not lowfat), eat how often, past 12 months                                  |
| 666 | V00FFQ28 | Num  | 8   | FFQ1Z. | 3.       | SAQ:Block Brief 2000: any other vegetable (e.g., corn/ squash/ okra),eat how often, past 12 months                            |

## The CONTENTS Procedure

## Alphabetic List of Variables and Attributes

| #   | Variable | Type | Len | Format  | Informat | Label                                                                                                                                    |
|-----|----------|------|-----|---------|----------|------------------------------------------------------------------------------------------------------------------------------------------|
| 668 | V00FFQ29 | Num  | 8   | FFQ1Z.  | 3.       | SAQ:Block Brief 2000: vegetable soup/ vegetable beef, chicken vegetable or tomato soup, eat how often, past 12 months                    |
| 670 | V00FFQ30 | Num  | 8   | YNDK.   | 3.       | SAQ:Block Brief 2000: chicken/ meat/ fish, ever eat                                                                                      |
| 671 | V00FFQ31 | Num  | 8   | FFQ1Z.  | 3.       | SAQ:Block Brief 2000: hamburgers/ cheeseburgers/ meat loaf (at home or in restaurant), eat how often, past 12 months                     |
| 673 | V00FFQ32 | Num  | 8   | FFQ1Z.  | 3.       | SAQ:Block Brief 2000: tacos/ burritos/ enchiladas/ tamales, eat how often, past 12 months                                                |
| 675 | V00FFQ33 | Num  | 8   | FFQ1Z.  | 3.       | SAQ:Block Brief 2000: beef steaks/ roasts/ pot roast (including in frozen dinners/ sandwiches), eat how often, past 12 months            |
| 677 | V00FFQ34 | Num  | 8   | FFQ1Z.  | 3.       | SAQ:Block Brief 2000: pork (including chops/ roasts)/ dinner ham, eat how much, past 12 months                                           |
| 679 | V00FFQ35 | Num  | 8   | FFQ10Z. | 3.       | SAQ:Block Brief 2000: beef/ pork, when eat do you ...                                                                                    |
| 680 | V00FFQ36 | Num  | 8   | FFQ1Z.  | 3.       | SAQ:Block Brief 2000: mixed dishes with meat or chicken (e.g., stew/ corned beef hash or in frozen meals), eat how often, past 12 months |
| 682 | V00FFQ37 | Num  | 8   | FFQ1Z.  | 3.       | SAQ:Block Brief 2000: fried chicken, at home or in a restaurant, eat how often, past 12 months                                           |
| 684 | V00FFQ38 | Num  | 8   | FFQ1Z.  | 3.       | SAQ:Block Brief 2000: chicken/ turkey not fried (e.g., baked/ grilled/ on sandwiches), eat how often, past 12 months                     |
| 686 | V00FFQ39 | Num  | 8   | FFQ11Z. | 3.       | SAQ:Block Brief 2000: chicken, when eat do you ...                                                                                       |
| 687 | V00FFQ40 | Num  | 8   | FFQ1Z.  | 3.       | SAQ:Block Brief 2000: fried fish/ fish sandwich at home or in a restaurant, eat how often, past 12 months                                |
| 689 | V00FFQ41 | Num  | 8   | FFQ1Z.  | 3.       | SAQ:Block Brief 2000: any other fish/ shellfish not fried (including tuna), eat how often, past 12 months                                |
| 691 | V00FFQ42 | Num  | 8   | FFQ1Z.  | 3.       | SAQ:Block Brief 2000: hot dogs/ sausage (e.g., Polish/ Italian/ Chorizo), eat how often, past 12 months                                  |
| 693 | V00FFQ43 | Num  | 8   | FFQ1Z.  | 3.       | SAQ:Block Brief 2000: boloney (bologna)/ sliced ham/ turkey lunch meat/ other lunch meat, eat how often, past 12 months                  |
| 695 | V00FFQ44 | Num  | 8   | FFQ12Z. | 3.       | SAQ:Block Brief 2000: lunch meats, when eat are they ...                                                                                 |
| 696 | V00FFQ45 | Num  | 8   | FFQ1Z.  | 3.       | SAQ:Block Brief 2000: spaghetti/ lasagna/ other pasta with tomato sauce, eat how often, past 12 months                                   |
| 698 | V00FFQ46 | Num  | 8   | FFQ1Z.  | 3.       | SAQ:Block Brief 2000: cheese dishes without tomato sauce (e.g., macaroni and cheese), eat how often, past 12 months                      |

## The CONTENTS Procedure

## Alphabetic List of Variables and Attributes

| #   | Variable | Type | Len | Format  | Informat | Label                                                                                                                                        |
|-----|----------|------|-----|---------|----------|----------------------------------------------------------------------------------------------------------------------------------------------|
| 700 | V00FFQ47 | Num  | 8   | FFQ1Z.  | 3.       | SAQ:Block Brief 2000: pizza (including carry- out), eat how often, past 12 months                                                            |
| 702 | V00FFQ48 | Num  | 8   | FFQ1Z.  | 3.       | SAQ:Block Brief 2000: biscuits/ muffins, eat how often, past 12 months                                                                       |
| 704 | V00FFQ49 | Num  | 8   | FFQ1Z.  | 3.       | SAQ:Block Brief 2000: rolls/ hamburger buns/ english muffins/ bagels, eat how often, past 12 months                                          |
| 706 | V00FFQ50 | Num  | 8   | FFQ1Z.  | 3.       | SAQ:Block Brief 2000: white bread/ toast (including French/ Italian or in sandwiches), eat how often, past 12 months                         |
| 708 | V00FFQ51 | Num  | 8   | FFQ1Z.  | 3.       | SAQ:Block Brief 2000: dark bread (e.g., rye/ whole wheat, including in sandwiches), eat how often, past 12 months                            |
| 710 | V00FFQ52 | Num  | 8   | FFQ1Z.  | 3.       | SAQ:Block Brief 2000: tortillas, eat how often, past 12 months                                                                               |
| 712 | V00FFQ53 | Num  | 8   | FFQ1Z.  | 3.       | SAQ:Block Brief 2000: margarine on bread/ potatoes/ vegetables, eat how often, past 12 months                                                |
| 714 | V00FFQ54 | Num  | 8   | FFQ1Z.  | 3.       | SAQ:Block Brief 2000: butter on bread/ potatoes/ vegetables, eat how often, past 12 months                                                   |
| 716 | V00FFQ55 | Num  | 8   | FFQ1Z.  | 3.       | SAQ:Block Brief 2000: peanuts/ peanut butter, eat how often, past 12 months                                                                  |
| 718 | V00FFQ56 | Num  | 8   | FFQ1Z.  | 3.       | SAQ:Block Brief 2000: snacks (e.g., potato chips/ corn chips/ popcorn/ pretzels), eat how often, past 12 months                              |
| 720 | V00FFQ57 | Num  | 8   | FFQ1Z.  | 3.       | SAQ:Block Brief 2000: doughnuts/ cake/ pastry/ pie, eat how often, past 12 months                                                            |
| 722 | V00FFQ58 | Num  | 8   | FFQ1Z.  | 3.       | SAQ:Block Brief 2000: cookies (not lowfat), eat how often, past 12 months                                                                    |
| 724 | V00FFQ59 | Num  | 8   | FFQ1Z.  | 3.       | SAQ:Block Brief 2000: ice cream/ frozen yogurt/ ice cream bars, eat how often, past 12 months                                                |
| 726 | V00FFQ60 | Num  | 8   | FFQ13Z. | 3.       | SAQ:Block Brief 2000: ice cream/ frozen yogurt, when eat is it...                                                                            |
| 727 | V00FFQ61 | Num  | 8   | FFQ1Z.  | 3.       | SAQ:Block Brief 2000: chocolate candy/ candy bars, eat how often, past 12 months                                                             |
| 729 | V00FFQ62 | Num  | 8   | FFQ1Z.  | 3.       | SAQ:Block Brief 2000: real orange or grapefruit juice/ Welch's grape juice/ Minute maid juices/ Juicy Juice, drink how often, past 12 months |
| 731 | V00FFQ63 | Num  | 8   | FFQ1Z.  | 3.       | SAQ:Block Brief 2000: Hawaiian Punch/ Sunny Delight/ Hi- C/ Tang/ Ocean Spray juices, drink how often, past 12 months                        |
| 733 | V00FFQ64 | Num  | 8   | FFQ1Z.  | 3.       | SAQ:Block Brief 2000: Kool Aid/ Capri Sun/ Knudsen juices, drink how often, past 12 months                                                   |

## The CONTENTS Procedure

## Alphabetic List of Variables and Attributes

| #   | Variable | Type | Len | Format   | Informat | Label                                                                                                                     |
|-----|----------|------|-----|----------|----------|---------------------------------------------------------------------------------------------------------------------------|
| 735 | V00FFQ65 | Num  | 8   | FFQ1Z.   | 3.       | SAQ:Block Brief 2000: instant breakfast milkshakes, diet shakes, or liquid supplements, drink how often, past 12 months   |
| 737 | V00FFQ66 | Num  | 8   | FFQ1Z.   | 3.       | SAQ:Block Brief 2000: glasses of milk (any kind), drink how often, past 12 months                                         |
| 739 | V00FFQ67 | Num  | 8   | FFQ15Z.  | 3.       | SAQ:Block Brief 2000: glasses of milk, when drink what kind usually drink                                                 |
| 740 | V00FFQ68 | Num  | 8   | FFQ1Z.   | 3.       | SAQ:Block Brief 2000: cream/ half and half/ non- dairy creamer in coffee or tea, drink how often, past 12 months          |
| 742 | V00FFQ69 | Num  | 8   | FFQ1Z.   | 3.       | SAQ:Block Brief 2000: regular soft drinks/ bottled drinks like Snapple (not diet drinks), drink how often, past 12 months |
| 744 | V00FFQ70 | Num  | 8   | FFQ1Z.   | 3.       | SAQ:Block Brief 2000: beer, drink how often, past 12 months                                                               |
| 746 | V00FFQ71 | Num  | 8   | FFQ1Z.   | 3.       | SAQ:Block Brief 2000: wine/ wine coolers, drink how often, past 12 months                                                 |
| 747 | V00FFQ72 | Num  | 8   | FFQ1Z.   | 3.       | SAQ:Block Brief 2000: liquor/ mixed drinks, drink how often, past 12 months                                               |
| 748 | V00FFQ73 | Num  | 8   | YNDKREG. | 3.       | SAQ:Block Brief 2000: vitamins/ minerals, taken regularly (at least once per month), past 12 months                       |
| 762 | V00FFQ87 | Num  | 8   | VIT1Z.   | 3.       | SAQ:Block Brief 2000: Vitamin C, if took how many milligrams usually take on days taken, past 12 months                   |
| 763 | V00FFQ88 | Num  | 8   | VIT2Z.   | 3.       | SAQ:Vitamin D, if took how many IUs usually take on days taken, past 12 months                                            |
| 764 | V00FFQ89 | Num  | 8   | VIT2Z.   | 3.       | SAQ:Block Brief 2000: Vitamin E, if took how many IUs usually take on days taken, past 12 months                          |
| 778 | V00FFQ90 | Num  | 8   | FFQ14Z.  | 2.       | SAQ:Block Brief 2000: fat or oil, how often use in cooking                                                                |
| 779 | V00FFQ91 | Num  | 8   | YNDK.    | 2.       | SAQ:Block Brief 2000: fat or oil usually use in cooking, PAM                                                              |
| 780 | V00FFQ92 | Num  | 8   | YNDK.    | 2.       | SAQ:Block Brief 2000: fat or oil usually use in cooking, stick margarine                                                  |
| 781 | V00FFQ93 | Num  | 8   | YNDK.    | 2.       | SAQ:Block Brief 2000: fat or oil usually use in cooking, soft tub margarine                                               |
| 782 | V00FFQ94 | Num  | 8   | YNDK.    | 2.       | SAQ:Block Brief 2000: fat or oil usually use in cooking, butter                                                           |
| 783 | V00FFQ95 | Num  | 8   | YNDK.    | 2.       | SAQ:Block Brief 2000: fat or oil usually use in cooking, butter/ margarine blend                                          |
| 784 | V00FFQ96 | Num  | 8   | YNDK.    | 2.       | SAQ:Block Brief 2000: fat or oil usually use in cooking, low- fat margarine                                               |

## The CONTENTS Procedure

## Alphabetic List of Variables and Attributes

| #   | Variable   | Type | Len | Format  | Informat | Label                                                                                                                                                   |
|-----|------------|------|-----|---------|----------|---------------------------------------------------------------------------------------------------------------------------------------------------------|
| 785 | V00FFQ97   | Num  | 8   | YNDK.   | 2.       | SAQ:Block Brief 2000: fat or oil usually use in cooking, corn oil/ vegetable oil                                                                        |
| 786 | V00FFQ98   | Num  | 8   | YNDK.   | 2.       | SAQ:Block Brief 2000: fat or oil usually use in cooking, olive oil/ canola oil                                                                          |
| 787 | V00FFQ99   | Num  | 8   | YNDK.   | 2.       | SAQ:Block Brief 2000: fat or oil usually use in cooking, lard/ fatback/ bacon fat                                                                       |
| 788 | V00FFQ100  | Num  | 8   | YNDK.   | 2.       | SAQ:Block Brief 2000: fat or oil usually use in cooking, Crisco                                                                                         |
| 789 | V00FFQ101  | Num  | 8   | YNDK.   | 3.       | SAQ:Block Brief 2000: fat or oil usually use in cooking, don't know                                                                                     |
| 790 | V00FFQ102  | Num  | 8   | YNDK.   | 2.       | SAQ:Block Brief 2000: do not use fat or oil in cooking                                                                                                  |
| 893 | V00FFQFLG1 | Num  | 8   | YNDK.   |          | SAQ:Block Brief 2000: exclusion criteria flag, kcal less than 500 or greater than 5000 (men and women) (calc)                                           |
| 892 | V00FFQFLG2 | Num  | 8   | YNDK.   |          | SAQ:Block Brief 2000: exclusion criteria flag,kcal less than 800/ greater than 4200 (men only),kcal less than 500/ greater than 3500 (women only)(calc) |
| 895 | V00FFQFLG3 | Num  | 8   | YNDK.   |          | SAQ:Block Brief 2000: exclusion criteria flag, kcals greater than 2 standard deviations from the mean (calc)                                            |
| 894 | V00FFQFLG4 | Num  | 8   | YNDK.   |          | SAQ:Block Brief 2000: exclusion criteria flag, kcals greater than 3 times the interquartile range (calc)                                                |
| 891 | V00FFQFLG5 | Num  | 8   | YNDK.   |          | SAQ:Block Brief 2000: exclusion criteria flag, more than 15% of questions were skipped (calc)                                                           |
| 614 | V00FFQSZ1  | Num  | 8   | LADDER. | 3.       | SAQ:Block Brief 2000: eggs (not egg substitutes), how many each time                                                                                    |
| 616 | V00FFQSZ2  | Num  | 8   | LADDER. | 3.       | SAQ:Block Brief 2000: bacon/ breakfast sausage, how many pieces each time                                                                               |
| 618 | V00FFQSZ3  | Num  | 8   | FFQ2Z.  | 3.       | SAQ:Block Brief 2000: cooked cereals, which bowl each time                                                                                              |
| 620 | V00FFQSZ4  | Num  | 8   | FFQ2Z.  | 3.       | SAQ:Block Brief 2000: cold cereals, which bowl each time                                                                                                |
| 623 | V00FFQSZ6  | Num  | 8   | LADDER. | 3.       | SAQ:Block Brief 2000: cheese, how many slices each time                                                                                                 |
| 625 | V00FFQSZ7  | Num  | 8   | FFQ2Z.  | 3.       | SAQ:Block Brief 2000: yogurt (not frozen yogurt), how much each time                                                                                    |
| 627 | V00FFQSZ8  | Num  | 8   | FFQ4Z.  | 3.       | SAQ:Block Brief 2000: bananas, how many each time                                                                                                       |
| 629 | V00FFQSZ9  | Num  | 8   | FFQ4Z.  | 3.       | SAQ:Block Brief 2000: apples/ pears, how many each time                                                                                                 |
| 631 | V00FFQSZ10 | Num  | 8   | FFQ4Z.  | 3.       | SAQ:Block Brief 2000: oranges/ tangerines, how many each time                                                                                           |
| 633 | V00FFQSZ11 | Num  | 8   | FFQ2Z.  | 3.       | SAQ:Block Brief 2000: applesauce/ fruit cocktail/ any canned fruit, how much each time                                                                  |

## The CONTENTS Procedure

## Alphabetic List of Variables and Attributes

| #   | Variable   | Type | Len | Format  | Informat | Label                                                                                                  |
|-----|------------|------|-----|---------|----------|--------------------------------------------------------------------------------------------------------|
| 635 | V00FFQSZ12 | Num  | 8   | FFQ2Z.  | 3.       | SAQ:Block Brief 2000: any other fruit, how much each time                                              |
| 637 | V00FFQSZ13 | Num  | 8   | FFQ2Z.  | 3.       | SAQ:Block Brief 2000: french fries/ fried potatoes/ hash browns, how much each time                    |
| 639 | V00FFQSZ14 | Num  | 8   | FFQ2Z.  | 3.       | SAQ:Block Brief 2000: white potatoes not fried, how much each time                                     |
| 641 | V00FFQSZ15 | Num  | 8   | FFQ2Z.  | 3.       | SAQ:Block Brief 2000: sweet potatoes/ yams/ sweet potato pie, how much each time                       |
| 643 | V00FFQSZ16 | Num  | 8   | FFQ2Z.  | 3.       | SAQ:Block Brief 2000: rice/ dishes made with rice, how much each time                                  |
| 645 | V00FFQSZ17 | Num  | 8   | FFQ2Z.  | 3.       | SAQ:Block Brief 2000: baked beans/ chili with beans/ pintos/ any other dried beans, how much each time |
| 647 | V00FFQSZ18 | Num  | 8   | FFQ2Z.  | 3.       | SAQ:Block Brief 2000: refried beans, how much each time                                                |
| 649 | V00FFQSZ19 | Num  | 8   | FFQ2Z.  | 3.       | SAQ:Block Brief 2000: green beans/ green peas, how much each time                                      |
| 651 | V00FFQSZ20 | Num  | 8   | FFQ2Z.  | 3.       | SAQ:Block Brief 2000: broccoli, how much each time                                                     |
| 653 | V00FFQSZ21 | Num  | 8   | FFQ2Z.  | 3.       | SAQ:Block Brief 2000: carrots/ stews or mixed vegetables containing carrots, how much each time        |
| 655 | V00FFQSZ22 | Num  | 8   | FFQ2Z.  | 3.       | SAQ:Block Brief 2000: spinach/ greens, how much each time                                              |
| 657 | V00FFQSZ23 | Num  | 8   | FFQ2Z.  | 3.       | SAQ:Block Brief 2000: cole slaw/ cabbage, how much each time                                           |
| 659 | V00FFQSZ24 | Num  | 8   | FFQ2Z.  | 3.       | SAQ:Block Brief 2000: green salad, how much each time                                                  |
| 661 | V00FFQSZ25 | Num  | 8   | FFQ0Z.  | 3.       | SAQ:Block Brief 2000: raw tomatoes, how much each time                                                 |
| 663 | V00FFQSZ26 | Num  | 8   | LADDER. | 3.       | SAQ:Block Brief 2000: catsup/ salsa/ chile peppers, how many TBSP each time                            |
| 665 | V00FFQSZ27 | Num  | 8   | LADDER. | 3.       | SAQ:Block Brief 2000: salad dressing/ mayonnaise (not lowfat), how many TBSP each time                 |
| 667 | V00FFQSZ28 | Num  | 8   | FFQ2Z.  | 3.       | SAQ:Block Brief 2000: any other vegetable, how much each time                                          |
| 669 | V00FFQSZ29 | Num  | 8   | FFQ2Z.  | 3.       | SAQ:Block Brief 2000: vegetable soups, which bowl each time                                            |
| 672 | V00FFQSZ31 | Num  | 8   | FFQ3Z.  | 3.       | SAQ:Block Brief 2000: meat (hamburgers...), how much each time                                         |
| 674 | V00FFQSZ32 | Num  | 8   | FFQ2Z.  | 3.       | SAQ:Block Brief 2000: tacos/ burritos/ enchiladas/ tamales, how much each time                         |

## The CONTENTS Procedure

## Alphabetic List of Variables and Attributes

| #   | Variable   | Type | Len | Format  | Informat | Label                                                                                                     |
|-----|------------|------|-----|---------|----------|-----------------------------------------------------------------------------------------------------------|
| 676 | V00FFQSZ33 | Num  | 8   | FFQ2Z.  | 3.       | SAQ:Block Brief 2000: beef steaks/ roasts/ pot roast, how much each time                                  |
| 678 | V00FFQSZ34 | Num  | 8   | FFQ2Z.  | 3.       | SAQ:Block Brief 2000: pork/ dinner ham, how much each time                                                |
| 681 | V00FFQSZ36 | Num  | 8   | FFQ2Z.  | 3.       | SAQ:Block Brief 2000: mixed dishes with meat or chicken, how much each time                               |
| 683 | V00FFQSZ37 | Num  | 8   | LADDER. | 3.       | SAQ:Block Brief 2000: fried chicken, number medium pieces each time                                       |
| 685 | V00FFQSZ38 | Num  | 8   | FFQ2Z.  | 3.       | SAQ:Block Brief 2000: chicken/ turkey not fried, how much each time                                       |
| 688 | V00FFQSZ40 | Num  | 8   | FFQ2Z.  | 3.       | SAQ:Block Brief 2000: fried fish/ fish sandwich, how much each time                                       |
| 690 | V00FFQSZ41 | Num  | 8   | FFQ2Z.  | 3.       | SAQ:Block Brief 2000: any other fish/ shellfish not fried, how much each time                             |
| 692 | V00FFQSZ42 | Num  | 8   | LADDER. | 3.       | SAQ:Block Brief 2000: hot dogs/ sausage, how many each time                                               |
| 694 | V00FFQSZ43 | Num  | 8   | LADDER. | 3.       | SAQ:Block Brief 2000: boloney/ sliced ham/ turkey lunch meat/ other lunch meat, how many slices each time |
| 697 | V00FFQSZ45 | Num  | 8   | FFQ2Z.  | 3.       | SAQ:Block Brief 2000: spaghetti/ lasagna/ other pasta with tomato sauce, how much each time               |
| 699 | V00FFQSZ46 | Num  | 8   | FFQ2Z.  | 3.       | SAQ:Block Brief 2000: cheese dishes without tomato sauce, how much each time                              |
| 701 | V00FFQSZ47 | Num  | 8   | LADDER. | 3.       | SAQ:Block Brief 2000: pizza, how many slices each time                                                    |
| 703 | V00FFQSZ48 | Num  | 8   | LADDER. | 3.       | SAQ:Block Brief 2000: biscuits/ muffins, how many each time                                               |
| 705 | V00FFQSZ49 | Num  | 8   | FFQ4Z.  | 3.       | SAQ:Block Brief 2000: rolls/ hamburger buns/ english muffins/ bagels, how many each time                  |
| 707 | V00FFQSZ50 | Num  | 8   | LADDER. | 3.       | SAQ:Block Brief 2000: white bread/ toast, how many slices each time                                       |
| 709 | V00FFQSZ51 | Num  | 8   | LADDER. | 3.       | SAQ:Block Brief 2000: dark bread, how many slices each time                                               |
| 711 | V00FFQSZ52 | Num  | 8   | LADDER. | 3.       | SAQ:Block Brief 2000: tortillas, how many each time                                                       |
| 713 | V00FFQSZ53 | Num  | 8   | LADDER. | 3.       | SAQ:Block Brief 2000: margarine on bread/ potatoes/ vegetables, how many pats (tsp.) each time            |
| 715 | V00FFQSZ54 | Num  | 8   | LADDER. | 3.       | SAQ:Block Brief 2000: butter on bread/ potatoes/ vegetables, how many pats (tsp.) each time               |



## The CONTENTS Procedure

## Alphabetic List of Variables and Attributes

| #   | Variable   | Type | Len | Format  | Informat | Label                                                                                                                                   |
|-----|------------|------|-----|---------|----------|-----------------------------------------------------------------------------------------------------------------------------------------|
| 717 | V00FFQSZ55 | Num  | 8   | LADDER. | 3.       | SAQ:Block Brief 2000: peanuts/ peanut butter, how many TBSP each time                                                                   |
| 719 | V00FFQSZ56 | Num  | 8   | FFQ2Z.  | 3.       | SAQ:Block Brief 2000: snacks (not pretzels), how much each time                                                                         |
| 721 | V00FFQSZ57 | Num  | 8   | LADDER. | 3.       | SAQ:Block Brief 2000: doughnuts/ cake/ pastry/ pie, how many pieces each time                                                           |
| 723 | V00FFQSZ58 | Num  | 8   | FFQ5Z.  | 3.       | SAQ:Block Brief 2000: cookies (not lowfat), how many each time                                                                          |
| 725 | V00FFQSZ59 | Num  | 8   | FFQ2Z.  | 3.       | SAQ:Block Brief 2000: ice cream/ frozen yogurt/ ice cream bars, how much each time                                                      |
| 728 | V00FFQSZ61 | Num  | 8   | FFQ6Z.  | 3.       | SAQ:Block Brief 2000: chocolate candy/ candy bars, how many bars each time                                                              |
| 730 | V00FFQSZ62 | Num  | 8   | LADDER. | 3.       | SAQ:Block Brief 2000: real orange or grapefruit juice/ Welch's grape juice/ Minutemaide juices/ Juicy Juice, how many glasses each time |
| 732 | V00FFQSZ63 | Num  | 8   | LADDER. | 3.       | SAQ:Block Brief 2000: Hawaiian Punch/ Sunny Delight/ Hi-C/ Tang/ Ocean Spray juices, how many glasses each time                         |
| 734 | V00FFQSZ64 | Num  | 8   | LADDER. | 3.       | SAQ:Block Brief 2000: Kool Aid/ Capri Sun/ Knudsen juices, how many glasses each time                                                   |
| 736 | V00FFQSZ65 | Num  | 8   | LADDER. | 3.       | SAQ:Block Brief 2000: instant breakfast milkshakes, diet shakes, or liquid supplements, how many glasses or cans each time              |
| 738 | V00FFQSZ66 | Num  | 8   | LADDER. | 3.       | SAQ:Block Brief 2000: milk (any kind), how many glasses each time                                                                       |
| 741 | V00FFQSZ68 | Num  | 8   | FFQ7Z.  | 3.       | SAQ:Block Brief 2000: cream/ half and half/ non-dairy creamer in coffee or tea, total TBSP on those days                                |
| 743 | V00FFQSZ69 | Num  | 8   | FFQ7Z.  | 3.       | SAQ:Block Brief 2000: regular soft drinks/ bottled drinks (not diet drinks), how many bottles or cans each time                         |
| 745 | V00FFQSZ70 | Num  | 8   | FFQ7Z.  | 3.       | SAQ:Block Brief 2000: beer, how many bottles or cans each time                                                                          |
| 897 | V00FFQSZL  | Num  | 8   | FFQ7X.  |          | SAQ:Block Brief 2000: liquor/ mixed drinks, how many drinks each time (calc)                                                            |
| 896 | V00FFQSZW  | Num  | 8   | FFQ7X.  |          | SAQ:Block Brief 2000: wine/ wine coolers, how many glasses each time (calc)                                                             |
| 749 | V00FFQYR74 | Num  | 8   | FFQ8Z.  | 3.       | SAQ:Block Brief 2000: regular Once-A-Day/ Centrum/ Thera type multivitamins, how many years                                             |
| 750 | V00FFQYR75 | Num  | 8   | FFQ8Z.  | 3.       | SAQ:Block Brief 2000: Stress-tabs/ B-Complex type multivitamins, how many years                                                         |

## The CONTENTS Procedure

## Alphabetic List of Variables and Attributes

| #   | Variable   | Type | Len | Format  | Informat | Label                                                                                                   |
|-----|------------|------|-----|---------|----------|---------------------------------------------------------------------------------------------------------|
| 751 | V00FFQYR76 | Num  | 8   | FFQ8Z.  | 3.       | SAQ:Block Brief 2000: Antioxidant combination type multivitamins, how many years                        |
| 752 | V00FFQYR77 | Num  | 8   | FFQ8Z.  | 3.       | SAQ:Block Brief 2000: Vitamin A (not beta- carotene) single vitamins, how many years                    |
| 753 | V00FFQYR78 | Num  | 8   | FFQ8Z.  | 3.       | SAQ:Block Brief 2000: Beta- carotene single vitamin, how many years                                     |
| 754 | V00FFQYR79 | Num  | 8   | FFQ8Z.  | 3.       | SAQ:Block Brief 2000: Vitamin C single vitamin, how many years                                          |
| 755 | V00FFQYR80 | Num  | 8   | FFQ8Z.  | 3.       | SAQ:Block Brief 2000: Vitamin E single vitamin, how many years                                          |
| 756 | V00FFQYR81 | Num  | 8   | FFQ8Z.  | 3.       | SAQ:Block Brief 2000: Folic acid, folate single vitamin, how many years                                 |
| 757 | V00FFQYR82 | Num  | 8   | FFQ8Z.  | 3.       | SAQ:Block Brief 2000: Calcium/ Tums (alone or combined with Vitamin D or magnesium), how many years     |
| 758 | V00FFQYR83 | Num  | 8   | FFQ8Z.  | 3.       | SAQ:Block Brief 2000: Zinc alone, how many years                                                        |
| 759 | V00FFQYR84 | Num  | 8   | FFQ8Z.  | 3.       | SAQ:Block Brief 2000: Iron alone, how many years                                                        |
| 760 | V00FFQYR85 | Num  | 8   | FFQ8Z.  | 3.       | SAQ:Block Brief 2000: Selenium alone, how many years                                                    |
| 761 | V00FFQYR86 | Num  | 8   | FFQ8Z.  | 3.       | SAQ:Block Brief 2000: Vitamin D, alone or with calcium, how many years                                  |
| 848 | V00FIBBEAN | Num  | 8   |         |          | SAQ:Block Brief 2000: daily dietary fiber from beans (g) (calc)                                         |
| 866 | V00FIBGRN  | Num  | 8   |         |          | SAQ:Block Brief 2000: daily dietary fiber from grains (g) (calc)                                        |
| 806 | V00FIBVGFR | Num  | 8   |         |          | SAQ:Block Brief 2000: daily dietary fiber from vegetables and fruits (g) (calc)                         |
| 797 | V00FOLATCV | Num  | 8   | FFQ16X. |          | SAQ:Block Brief 2000: Folic acid, folate single vitamin, how often past 12 months (calc)                |
| 513 | V00FOLKCUR | Num  | 8   | YNDK.   | 3.       | EV:Q59hii.CAM: currently seeing folk medicine practitioner for arthritis or joint pain                  |
| 566 | V00FOLKCV  | Num  | 8   | YNDK.   |          | EV:Q59h.CAM: seen folk medicine practitioner for arthritis or joint pain, past 12 months (calc)         |
| 512 | V00FOLKNUM | Num  | 8   | CAM.    | 3.       | EV:Q59hi.CAM: how many times see folk medicine practitioner for arthritis or joint pain, past 12 months |
| 559 | V00GLCFQCV | Num  | 8   | FREQ3X. |          | EV:Q52bi.Glucosamine frequency of use, past 6 months (calc)                                             |
| 488 | V00GLUC    | Num  | 8   | YNDK.   | 3.       | EV:Q52b.Used glucosamine for joint pain or arthritis, past 6 months                                     |

## The CONTENTS Procedure

## Alphabetic List of Variables and Attributes

| #    | Variable   | Type | Len | Format    | Informat | Label                                                                                                                                     |
|------|------------|------|-----|-----------|----------|-------------------------------------------------------------------------------------------------------------------------------------------|
| 496  | V00GNRH    | Num  | 8   | YNDK.     | 3.       | EV:Q56.Received GnRH antagonist injections (such as Antagon, Cetrotide, Lupron) to treat vaginal bleeding/ prostate cancer, past 6 months |
| 497  | V00GNRHUSE | Num  | 8   | MEDDUR2X. | 3.       | EV:Q56a.Last time had GnRH antagonist injection, past 6 months                                                                            |
| 1217 | V00HANDED  | Num  | 8   | RLDK.     |          | EV XR:Dominant hand for hand x-ray (calc)                                                                                                 |
| 25   | V00HEMAT1  | Num  | 8   | YNDK.     |          | EV:Phlebotomy: traumatic venipuncture, hematoma (first draw) (calc)                                                                       |
| 26   | V00HEMAT2  | Num  | 8   | YNDK.     |          | EV:Phlebotomy: traumatic venipuncture, hematoma (repeat draw) (calc)                                                                      |
| 520  | V00HERB12  | Num  | 8   | YNDK.     | 3.       | EV:Q62.CAM: use herbs, such as echinacea, ginger or garlic, for arthritis or joint pain, past 12 months                                   |
| 575  | V00HERBCV  | Num  | 8   | YNDK.     |          | EV:Q62a.CAM: currently using any herbs for arthritis or joint pain (calc)                                                                 |
| 424  | V00HIPFX   | Num  | 8   | YNDK.     | 3.       | SAQ:Q30a.Doctor ever said you broke or fractured hip                                                                                      |
| 425  | V00HIPFXAG | Num  | 8   | 3.        | 3.       | SAQ:Q30ai.How old when doctor first said you broke or fractured hip                                                                       |
| 1155 | V00HLTHCAR | Num  | 8   | HEALTH2X. | 3.       | SAQ:Q7a.Where usually go for health care or advice about health care                                                                      |
| 1156 | V00HLTHCOV | Num  | 8   | YNDK.     | 3.       | SAQ:Q8.Currently have any kind of health care coverage                                                                                    |
| 515  | V00HOMECUR | Num  | 8   | YNDK.     | 3.       | EV:Q59iii.CAM: currently seeing homeopathy/ homeopathic treatment practitioner for arthritis or joint pain                                |
| 567  | V00HOMECV  | Num  | 8   | YNDK.     |          | EV:Q59i.CAM: seen homeopathy/ homeopathic treatment practitioner for arthritis or joint pain, past 12 months (calc)                       |
| 514  | V00HOMENUM | Num  | 8   | CAM.      | 3.       | EV:Q59ii.CAM: how many times see homeopathy/ homeopathic treatment practitioner for arthritis or joint pain, past 12 months               |
| 1114 | V00HOSPSUR | Num  | 8   | EXCL.     |          | EV:400-meter walk eligibility: meets new or old hospitalization/ surgery exclusion criteria (calc)                                        |
| 1177 | V00HOUACT1 | Num  | 8   | YNDK.     | 3.       | EV:Household activities: light housework, past 7 days                                                                                     |
| 1178 | V00HOUACT2 | Num  | 8   | YNDK.     | 3.       | EV:Household activities: heavy housework, past 7 days                                                                                     |
| 1179 | V00HOUACT3 | Num  | 8   | YNDK.     | 3.       | EV:Household activities: home repairs, past 7 days                                                                                        |
| 1180 | V00HOUACT4 | Num  | 8   | YNDK.     | 3.       | EV:Household activities: lawn work/ yard care, past 7 days                                                                                |

## The CONTENTS Procedure

## Alphabetic List of Variables and Attributes

| #    | Variable    | Type | Len | Format  | Informat | Label                                                                                                               |
|------|-------------|------|-----|---------|----------|---------------------------------------------------------------------------------------------------------------------|
| 1181 | V00HOUACT5  | Num  | 8   | YNDK.   | 3.       | EV:Household activities: outdoor gardening, past 7 days                                                             |
| 1182 | V00HOUACT6  | Num  | 8   | YNDK.   | 3.       | EV:Household activities: caring for another person, past 7 days                                                     |
| 19   | V00HOURS P1 | Num  | 8   |         |          | EV:Phlebotomy: how many hours passed since last ate any food before blood draw (first draw) (calc)                  |
| 20   | V00HOURS P2 | Num  | 8   |         |          | EV:Phlebotomy: how many hours passed since last ate any food before blood draw (repeat draw) (calc)                 |
| 1187 | V00HOURWK   | Num  | 8   | 4.      | 4.       | EV:Q47.When worked how many hours per week usually work, past 12 months (include any overtime hours usually worked) |
| 987  | V00HR135    | Num  | 8   | YNDK.   | 2.       | EV:Q9.400- meter walk: heart rate exceed 135 bpm during walk                                                        |
| 986  | V00HR400WK  | Num  | 8   | 4.      | 4.       | EV:Q8.400- meter walk: heart rate at 400- m or at stop                                                              |
| 974  | V00HRB4WLK  | Num  | 8   | 4.      | 4.       | EV:Q1.400- meter walk: heart rate before walk                                                                       |
| 1101 | V00HRELG    | Num  | 8   | EXCL.   |          | EV:400- meter walk eligibility: meets old or new heart rate exclusion criterion (calc)                              |
| 39   | V00HRSUC1   | Num  | 8   |         |          | EV:Urine collection: hours since ate food before collection (first collection) (calc)                               |
| 40   | V00HRSUC2   | Num  | 8   |         |          | EV:Urine collection: hours since ate food before collection (repeat collection) (calc)                              |
| 396  | V00HRTAT    | Num  | 8   | YNDK.   | 3.       | SAQ:Q17.Charlson Comorbidity: ever had heart attack                                                                 |
| 397  | V00HRTFAIL  | Num  | 8   | YNDK.   | 3.       | SAQ:Q18.Charlson Comorbidity: ever treated for heart failure                                                        |
| 263  | V00HSMSS    | Num  | 8   | 5.2     |          | SAQ:SF- 12: mental summary scale for the MOS 12- item short- form health survey (SF- 12) v2 (calc)                  |
| 262  | V00HSPSS    | Num  | 8   | 5.2     |          | SAQ:SF- 12: physical summary scale for the MOS 12- item short- form health survey (SF- 12) v2 (calc)                |
| 544  | V00HT25MM   | Num  | 8   |         |          | SAQ:Height at age 25, self- reported (mm) (calc)                                                                    |
| 554  | V00HYAINJL  | Num  | 8   | INJECT. |          | EV:Left knee hyaluronic acid injection, past 6 months (calc)                                                        |
| 553  | V00HYAINJR  | Num  | 8   | INJECT. |          | EV:Right knee hyaluronic acid injection, past 6 months (calc)                                                       |
| 490  | V00HYALKN   | Num  | 8   | LRB1X.  | 3.       | EV:Q53ai.Which knee, injection of hyaluronic acid, past 6 months                                                    |
| 560  | V00HYINJCV  | Num  | 8   | YNDK.   |          | EV:Q53a.Either knee, hyaluronic acid injection (Synvisc/ Hyalgan), past 6 months (calc)                             |
| 17   | V00ILLPWK1  | Num  | 8   | YNDK.   |          | EV:Phlebotomy: had illness in past week requiring antibiotics, hospitalization or steroids (first draw) (calc)      |

## The CONTENTS Procedure

## Alphabetic List of Variables and Attributes

| #    | Variable   | Type | Len | Format    | Informat | Label                                                                                                                   |
|------|------------|------|-----|-----------|----------|-------------------------------------------------------------------------------------------------------------------------|
| 18   | V00ILLPWK2 | Num  | 8   | YNDK.     |          | EV:Phlebotomy: had illness in past week requiring antibiotics, hospitalization or steroids (repeat draw) (calc)         |
| 1201 | V00INCOME  | Num  | 8   | INCOME.   |          | SAQ:Yearly income (calc)                                                                                                |
| 1223 | V00INCOME2 | Num  | 8   | INCOMET.  |          | SAQ:Yearly income (>50K or <50K) (calc)                                                                                 |
| 800  | V00IRONCV  | Num  | 8   | FFQ16X.   |          | SAQ:Block Brief 2000: Iron alone, how often past 12 months (calc)                                                       |
| 1020 | V00K1STFID | Char | 4   | \$4.      | \$4.     | EV:Knee exam: staff ID #                                                                                                |
| 1069 | V00KEXAMK  | Num  | 8   | LRB.      |          | EV:Knee exam: knee eligible to be examined (calc)                                                                       |
| 253  | V00KGLRS   | Num  | 8   | QOLSCALE. | 3.       | EV:Q28.Considering all ways knee pain and arthritis affect you, how are you doing today? Rated on scale of 0- 10        |
| 416  | V00KIDFXN  | Num  | 8   | YNDK.     | 3.       | SAQ:Q25a.Charlson Comorbidity: ever had problem with kidneys, poor kidney function (blood tests showed high creatinine) |
| 417  | V00KIDTRAN | Num  | 8   | YNDK.     | 3.       | SAQ:Q25c.Charlson Comorbidity: ever had problem with kidneys, received kidney transplant                                |
| 920  | V00KIKBALL | Num  | 8   | LRB2Z.    | 3.       | EV:Q1.Isometric strength: which leg use to kick ball                                                                    |
| 489  | V00KNINJ   | Num  | 8   | YNDK.     | 3.       | EV:Q53.Either knee, injections for treatment of arthritis, past 6 months                                                |
| 274  | V00KOOSFSR | Num  | 8   | 5.1       |          | EV:KOOS Function, Sports, and Recreational Activities Score (calc)                                                      |
| 244  | V00KOOSFX1 | Num  | 8   | PAIN1Z.   | 3.       | EV:Q23a.Either knee difficulty: squatting, last 7 days                                                                  |
| 245  | V00KOOSFX2 | Num  | 8   | PAIN1Z.   | 3.       | EV:Q23b.Either knee difficulty: running, last 7 days                                                                    |
| 246  | V00KOOSFX3 | Num  | 8   | PAIN1Z.   | 3.       | EV:Q23c.Either knee difficulty: jumping, last 7 days                                                                    |
| 247  | V00KOOSFX4 | Num  | 8   | PAIN1Z.   | 3.       | EV:Q23d.Either knee difficulty: twisting/ pivoting on injured knee, last 7 days                                         |
| 248  | V00KOOSFX5 | Num  | 8   | PAIN1Z.   | 3.       | EV:Q23e.Either knee difficulty: kneeling, last 7 days                                                                   |
| 270  | V00KOOSKPL | Num  | 8   | 5.1       |          | EV:Left knee: KOOS Pain Score (calc)                                                                                    |
| 265  | V00KOOSKPR | Num  | 8   | 5.1       |          | EV:Right knee: KOOS Pain Score (calc)                                                                                   |
| 275  | V00KOOSQOL | Num  | 8   | 5.1       |          | EV:KOOS Quality of Life Score (calc)                                                                                    |
| 272  | V00KOOSYML | Num  | 8   | 5.1       |          | EV:Left knee: KOOS Symptoms Score (calc)                                                                                |
| 267  | V00KOOSYMR | Num  | 8   | 5.1       |          | EV:Right knee: KOOS Symptoms Score (calc)                                                                               |
| 216  | V00KPLKN1  | Num  | 8   | PAIN1Z.   | 3.       | EV:Q13a.Left knee pain: twisting/ pivoting on knee, last 7 days                                                         |

## The CONTENTS Procedure

## Alphabetic List of Variables and Attributes

| #   | Variable   | Type | Len | Format   | Informat | Label                                                                                                           |
|-----|------------|------|-----|----------|----------|-----------------------------------------------------------------------------------------------------------------|
| 217 | V00KPLKN2  | Num  | 8   | PAIN1Z.  | 3.       | EV:Q13b.Left knee pain: straightening knee fully, last 7 days                                                   |
| 218 | V00KPLKN3  | Num  | 8   | PAIN1Z.  | 3.       | EV:Q13c.Left knee pain: bending knee fully, last 7 days                                                         |
| 183 | V00KPRKN1  | Num  | 8   | PAIN1Z.  | 3.       | EV:Q2a.Right knee pain: twisting/ pivoting on knee, last 7 days                                                 |
| 184 | V00KPRKN2  | Num  | 8   | PAIN1Z.  | 3.       | EV:Q2b.Right knee pain: straightening knee fully, last 7 days                                                   |
| 185 | V00KPRKN3  | Num  | 8   | PAIN1Z.  | 3.       | EV:Q2c.Right knee pain: bending knee fully, last 7 days                                                         |
| 249 | V00KQOL1   | Num  | 8   | TIME2C.  | 3.       | EV:Q24.Quality of life: how often aware of problems with knee(s)                                                |
| 250 | V00KQOL2   | Num  | 8   | KQOL.    | 3.       | EV:Q25.Quality of life: modified lifestyle to avoid potentially damaging activities to knee(s)                  |
| 251 | V00KQOL3   | Num  | 8   | KQOL3Z.  | 3.       | EV:Q26.Quality of life: how much troubled with lack of confidence in knee(s)                                    |
| 252 | V00KQOL4   | Num  | 8   | PAIN1Z.  | 3.       | EV:Q27.Quality of life: in general, how much difficulty have with knee(s)                                       |
| 222 | V00KSXLKN1 | Num  | 8   | TIME3X.  | 3.       | EV:Q17.Left knee symptoms: swelling, last 7 days                                                                |
| 223 | V00KSXLKN2 | Num  | 8   | TIME3X.  | 3.       | EV:Q18.Left knee symptoms: feel grinding, hear clicking or any other type of noise when knee moves, last 7 days |
| 224 | V00KSXLKN3 | Num  | 8   | TIME3X.  | 3.       | EV:Q19.Left knee symptoms: knee catch or hang up when moving, last 7 days                                       |
| 225 | V00KSXLKN4 | Num  | 8   | TIME33X. | 3.       | EV:Q20.Left knee symptoms: straighten knee fully, last 7 days                                                   |
| 226 | V00KSXLKN5 | Num  | 8   | TIME33X. | 3.       | EV:Q21.Left knee symptoms: bend knee fully, last 7 days                                                         |
| 189 | V00KSXRKN1 | Num  | 8   | TIME3X.  | 3.       | EV:Q6.Right knee symptoms: swelling, last 7 days                                                                |
| 190 | V00KSXRKN2 | Num  | 8   | TIME3X.  | 3.       | EV:Q7.Right knee symptoms: feel grinding, hear clicking or any other type of noise when knee moves, last 7 days |
| 191 | V00KSXRKN3 | Num  | 8   | TIME3X.  | 3.       | EV:Q8.Right knee symptoms: knee catch or hang up when moving, last 7 days                                       |
| 192 | V00KSXRKN4 | Num  | 8   | TIME33X. | 3.       | EV:Q9.Right knee symptoms: straighten knee fully, last 7 days                                                   |
| 193 | V00KSXRKN5 | Num  | 8   | TIME33X. | 3.       | EV:Q10.Right knee symptoms: bend knee fully, last 7 days                                                        |
| 33  | V00LEAKAG1 | Num  | 8   | YNDK.    |          | EV:Phlebotomy: traumatic venipuncture, leakage at venipuncture site (first draw) (calc)                         |
| 34  | V00LEAKAG2 | Num  | 8   | YNDK.    |          | EV:Phlebotomy: traumatic venipuncture, leakage at venipuncture site (repeat draw) (calc)                        |

## The CONTENTS Procedure

## Alphabetic List of Variables and Attributes

| #    | Variable   | Type | Len | Format  | Informat | Label                                                                                                   |
|------|------------|------|-----|---------|----------|---------------------------------------------------------------------------------------------------------|
| 949  | V00LEXCOMP | Num  | 8   | YNDK.   | 2.       | EV:Q19.Isometric strength: left knee extension, able to complete (3) measurements                       |
| 1063 | V00LEXP1CV | Num  | 8   | PAIN1Z. |          | EV:Q18a.Isometric strength: left knee extension, severity of pain (calc)                                |
| 1064 | V00LEXP2CV | Num  | 8   | EXP.    |          | EV:Q18b.Isometric strength: left knee extension, pain prevent from pushing as hard as can (calc)        |
| 948  | V00LEXP1   | Num  | 8   | YNDK.   | 3.       | EV:Q18.Isometric strength: left knee extension, any knee pain during test                               |
| 950  | V00LEXWHY1 | Num  | 8   | YNDK.   | 2.       | EV:Q19a.Isometric strength: left knee extension, not able to complete measurements, knee pain           |
| 951  | V00LEXWHY2 | Num  | 8   | YNDK.   | 2.       | EV:Q19a.Isometric strength: left knee extension, not able to complete measurements, equipment problems  |
| 952  | V00LEXWHY3 | Num  | 8   | YNDK.   | 2.       | EV:Q19a.Isometric strength: left knee extension, not able to complete measurements, participant fatigue |
| 953  | V00LEXWHY4 | Num  | 8   | YNDK.   | 2.       | EV:Q19a.Isometric strength: left knee extension, not able to complete measurements, participant refused |
| 954  | V00LEXWHY5 | Num  | 8   | YNDK.   | 2.       | EV:Q19a.Isometric strength: left knee extension, not able to complete measurements, other               |
| 956  | V00LFXCOMP | Num  | 8   | YNDK.   | 2.       | EV:Q22.Isometric strength: left knee flexion, able to complete (3) measurements                         |
| 1065 | V00LFXP1CV | Num  | 8   | PAIN1Z. |          | EV:Q21a.Isometric strength: left knee flexion, severity of pain (calc)                                  |
| 1066 | V00LFXP2CV | Num  | 8   | FXP.    |          | EV:Q21b.Isometric strength: left knee flexion, pain prevent from pulling as hard as can (calc)          |
| 955  | V00LFXPN   | Num  | 8   | YNDK.   | 3.       | EV:Q21.Isometric strength: left knee flexion, any knee pain during test                                 |
| 957  | V00LFXWHY1 | Num  | 8   | YNDK.   | 2.       | EV:Q22a.Isometric strength: left knee flexion, not able to complete measurements, knee pain             |
| 958  | V00LFXWHY2 | Num  | 8   | YNDK.   | 2.       | EV:Q22a.Isometric strength: left knee flexion, not able to complete measurements, equipment problems    |
| 959  | V00LFXWHY3 | Num  | 8   | YNDK.   | 2.       | EV:Q22a.Isometric strength: left knee flexion, not able to complete measurements, participant fatigue   |
| 960  | V00LFXWHY4 | Num  | 8   | YNDK.   | 2.       | EV:Q22a.Isometric strength: left knee flexion, not able to complete measurements, participant refused   |
| 961  | V00LFXWHY5 | Num  | 8   | YNDK.   | 2.       | EV:Q22a.Isometric strength: left knee flexion, not able to complete measurements, other                 |

## The CONTENTS Procedure

## Alphabetic List of Variables and Attributes

| #    | Variable   | Type | Len | Format   | Informat | Label                                                                                                    |
|------|------------|------|-----|----------|----------|----------------------------------------------------------------------------------------------------------|
| 404  | V00LGMEDS  | Num  | 8   | YNDK.    | 3.       | SAQ:Q22a.Charlson Comorbidity: take medicines for lung disease                                           |
| 421  | V00LIVDAM  | Num  | 8   | YNDK.    | 3.       | SAQ:Q29b.Charlson Comorbidity: have cirrhosis or serious liver damage                                    |
| 1150 | V00LIVE1   | Num  | 8   | YNDK.    | 2.       | SAQ:Q5.Live with spouse                                                                                  |
| 1151 | V00LIVE2   | Num  | 8   | YNDK.    | 2.       | SAQ:Q5.Live with romantic partner                                                                        |
| 1152 | V00LIVE3   | Num  | 8   | YNDK.    | 2.       | SAQ:Q5.Live with children                                                                                |
| 1153 | V00LIVE4   | Num  | 8   | YNDK.    | 2.       | SAQ:Q5.Live with other relatives or friends                                                              |
| 1154 | V00LIVE5   | Num  | 8   | YNDK.    | 2.       | SAQ:Q5.Live with someone else (not child, spouse, romantic partner)                                      |
| 1221 | V00LIVENO  | Num  | 8   | LIVENOB. |          | SAQ:Q4.Besides self, how many other people live in household (calc)                                      |
| 1034 | V00LKABPN  | Num  | 8   | YNDK.    | 3.       | EV:Left knee exam: anserine bursa, pain/ tenderness present on exam                                      |
| 1073 | V00LKALNMT | Num  | 8   |          |          | EV:Left knee exam: alignment, degrees (valgus negative) (calc)                                           |
| 1025 | V00LKEFFB  | Num  | 8   | YNDK.    | 3.       | EV:Left knee exam: effusion, bulge sign positive                                                         |
| 1026 | V00LKEFFPT | Num  | 8   | YNDK10B. | 3.       | EV:Left knee exam: effusion, patellar tap positive                                                       |
| 1071 | V00LKFHDEG | Num  | 8   |          |          | EV:Left knee exam: flexion contracture/ hyperextension, degrees (contracture positive) (calc)            |
| 1032 | V00LKLTPN  | Num  | 8   | YNDK.    | 3.       | EV:Left knee exam: lateral tibiofemoral pain/ tenderness present on exam                                 |
| 1033 | V00LKMTTPN | Num  | 8   | YNDK.    | 3.       | EV:Left knee exam: medial tibiofemoral pain/ tenderness present on exam                                  |
| 1022 | V00LKPATPN | Num  | 8   | YNDK.    | 3.       | EV:Left knee exam: patellar quadriceps tendinitis, pain/ tenderness at any four sites                    |
| 1036 | V00LKPFCRE | Num  | 8   | YNDK.    | 3.       | EV:Left knee exam: patello- femoral crepitus present on exam                                             |
| 1038 | V00LKPGDPN | Num  | 8   | YNDK.    | 3.       | EV:Left knee exam: patellar grind, painful or tender behind knee cap                                     |
| 1028 | V00LKRFXPN | Num  | 8   | YNDK.    | 2.       | EV:Left knee exam: knee flexion pain/ tenderness present on exam                                         |
| 945  | V00LLARM   | Num  | 8   | 5.1      | 5.1      | EV:Q15b.Isometric strength: left leg chair and transducer settings, arm support (cm)                     |
| 944  | V00LLBACK  | Num  | 8   | 5.1      | 5.1      | EV:Q15a.Isometric strength: left leg chair and transducer settings, back support (cm)                    |
| 946  | V00LLHORIZ | Num  | 8   | 5.1      | 5.1      | EV:Q15c.Isometric strength: left leg chair and transducer settings, horizontal bar (knee angle fix) (cm) |



## The CONTENTS Procedure

## Alphabetic List of Variables and Attributes

| #    | Variable   | Type | Len | Format    | Informat | Label                                                                                                                    |
|------|------------|------|-----|-----------|----------|--------------------------------------------------------------------------------------------------------------------------|
| 942  | V00LLLGTH  | Num  | 8   | 5.1       | 5.1      | EV:Q13.Isometric strength: left leg length from transducer to joint line (cm)                                            |
| 947  | V00LLVERT  | Num  | 8   | 5.1       | 5.1      | EV:Q15d.Isometric strength: left leg chair and transducer settings, vertical bar (height) (cm)                           |
| 1039 | V00LLWGT   | Num  | 8   | 3.        | 3.       | EV:Q16.Isometric strength: left leg weight (N)                                                                           |
| 405  | V00LMWHEN  | Num  | 8   | ASTHMA.   | 3.       | SAQ:Q22ai.Charlson Comorbidity: when usually take medicine for lung disease                                              |
| 1014 | V00LPN400W | Num  | 8   | YNDK.     | 2.       | EV:Q13.400- meter walk: left knee pain during walk                                                                       |
| 1016 | V00LPWKPRV | Num  | 8   | YNDK.     | 3.       | EV:Q13ii.400- meter walk: left knee pain prevent walking at usual pace                                                   |
| 1015 | V00LPWKTYP | Num  | 8   | PAIN1Z.   | 3.       | EV:Q13i.400- meter walk: left knee pain mild, moderate or severe                                                         |
| 403  | V00LUNG    | Num  | 8   | YNDK.     | 3.       | SAQ:Q22.Charlson Comorbidity: have emphysema, chronic bronchitis, or chronic obstructive lung disease (also called COPD) |
| 1149 | V00MARITST | Num  | 8   | MARITALX. | 3.       | SAQ:Q3.Marital status                                                                                                    |
| 517  | V00MASSCUR | Num  | 8   | YNDK.     | 3.       | EV:Q59kii.CAM: currently seeing massage practitioner for arthritis or joint pain                                         |
| 568  | V00MASSCV  | Num  | 8   | YNDK.     |          | EV:Q59k.CAM: seen massage practitioner for arthritis or joint pain, past 12 months (calc)                                |
| 516  | V00MASSNUM | Num  | 8   | CAM.      | 3.       | EV:Q59ki.CAM: how many times see massage practitioner for arthritis or joint pain, past 12 months                        |
| 910  | V00MAXCIRC | Num  | 8   | YNDK.     | 2.       | EV:Q7.Abdominal circumference: was maximal circumference (greatest protuberance) below the measured circumference        |
| 1157 | V00MEDINS  | Num  | 8   | YNDK.     | 3.       | SAQ:Q9.Have any health insurance plan that pays for all or part of cost of prescription medicines                        |
| 1188 | V00MISSWK  | Num  | 8   | 3.        | 3.       | EV:Q48.About how many half or full workdays missed because of knee pain, aching or stiffness, past 3 months              |
| 108  | V00MRSEQNL | Num  | 8   | LADDER.   |          | EV MRI:Left knee, number of unique OAI standard MRI sequences obtained (calc)                                            |
| 107  | V00MRSEQNR | Num  | 8   | LADDER.   |          | EV MRI:Right knee, number of unique OAI standard MRI sequences obtained (calc)                                           |
| 484  | V00MSM     | Num  | 8   | YNDK.     | 3.       | EV:Q50g.Used MSM (methylsulfonylmethane) for joint pain or arthritis more than half the days of the month, past 30 days  |
| 29   | V00MULTST1 | Num  | 8   | YNDK.     |          | EV:Phlebotomy: traumatic venipuncture, multiple sticks (first draw) (calc)                                               |
| 30   | V00MULTST2 | Num  | 8   | YNDK.     |          | EV:Phlebotomy: traumatic venipuncture, multiple sticks (repeat draw) (calc)                                              |

## The CONTENTS Procedure

## Alphabetic List of Variables and Attributes

| #    | Variable   | Type | Len | Format   | Informat | Label                                                                                                                                              |
|------|------------|------|-----|----------|----------|----------------------------------------------------------------------------------------------------------------------------------------------------|
| 791  | V00MVIT1CV | Num  | 8   | FFQ16X.  |          | SAQ:Block Brief 2000: Regular Once- A- Day, Centrum or Thera type multivitamins, how often past 12 months (calc)                                   |
| 482  | V00NARCOT  | Num  | 8   | YNDK.    | 3.       | EV:Q50e.Used strong prescription pain medications (e.g., narcotics) for joint pain or arthritis more than half the days of the month, past 30 days |
| 889  | V00NERRORS | Num  | 8   |          |          | SAQ:Block Brief 2000: error flag, how many serious errors were applied (calc)                                                                      |
| 846  | V00NFDSDAY | Num  | 8   |          |          | SAQ:Block Brief 2000: error flag, number of solid foods consumed per day (calc)                                                                    |
| 884  | V00NNOSERV | Num  | 8   |          |          | SAQ:Block Brief 2000: error flag, number of food items with serving size omitted (calc)                                                            |
| 1017 | V00NPN400W | Num  | 8   | YNDK.    | 2.       | EV:Q13.400- meter walk: no knee pain during walk                                                                                                   |
| 480  | V00NSAIDRX | Num  | 8   | YNDK.    | 3.       | EV:Q50c.Used prescription NSAIDS (e.g., Ibuprofen, Diclofenac).for joint pain or arthritis more than half the days of the month, past 30 days      |
| 479  | V00NSAIDS  | Num  | 8   | YNDK.    | 3.       | EV:Q50b.Used nonprescription NSAIDS (e.g., Aspirin, Ibuprofen).for joint pain or arthritis more than half the days of the month, past 30 days      |
| 885  | V00NSKIP   | Num  | 8   |          |          | SAQ:Block Brief 2000: error flag, number of food items skipped (calc)                                                                              |
| 985  | V00NUMSTOP | Num  | 8   | 3.       | 3.       | EV:Q4.400- meter walk: total number rest stops                                                                                                     |
| 835  | V00NWARNS  | Num  | 8   |          |          | SAQ:Block Brief 2000: error flag, how many warnings were applied (calc)                                                                            |
| 1010 | V00OTH400W | Num  | 8   | YNDK.    | 2.       | EV:Q12a.400- meter walk: type of discomfort, other                                                                                                 |
| 612  | V00OTHCAM  | Num  | 8   | YNDK.    |          | EV:CAM: seen ayurveda/ biofeedback/ energy healing/ hypnosis/ naturopathy practitioner for arthritis or joint pain, past 12 months (calc)          |
| 611  | V00OTHCAMC | Num  | 8   | YNDK.    |          | EV:CAM: currently seeing ayurveda/ biofeedback/ energy healing/ hypnosis/ naturopathy practitioner for arthritis or joint pain (calc)              |
| 35   | V00OTHVP1  | Num  | 8   | YNDK.    |          | EV:Phlebotomy: traumatic venipuncture, other (first draw) (calc)                                                                                   |
| 36   | V00OTHVP2  | Num  | 8   | YNDK.    |          | EV:Phlebotomy: traumatic venipuncture, other (repeat draw) (calc)                                                                                  |
| 219  | V00P7LKFR  | Num  | 8   | TIME2Z.  | 3.       | EV:Q14.Left knee pain: how often                                                                                                                   |
| 281  | V00P7LKRCV | Num  | 8   | PNSCALE. |          | EV:Q14a.Left knee pain: severity, past 7 days, rated on scale of 0- 10 (calc)                                                                      |
| 186  | V00P7RKFR  | Num  | 8   | TIME2Z.  | 3.       | EV:Q3.Right knee pain: how often                                                                                                                   |
| 280  | V00P7RKRCV | Num  | 8   | PNSCALE. |          | EV:Q3a.Right knee pain: severity, past 7 days, rated on scale of 0- 10 (calc)                                                                      |

## The CONTENTS Procedure

## Alphabetic List of Variables and Attributes

| #    | Variable   | Type | Len | Format   | Informat | Label                                                                                                                  |
|------|------------|------|-----|----------|----------|------------------------------------------------------------------------------------------------------------------------|
| 1163 | V00PA130   | Num  | 8   | YNDK.    | 3.       | EV:Q33.Climb up a total of 10 or more flights of stairs during single day, past 30 days (one flight is about 10 steps) |
| 1159 | V00PA230   | Num  | 8   | YNDK.    | 3.       | EV:Q29.Kneel 30 minutes or more during single day, past 30 days                                                        |
| 1160 | V00PA330   | Num  | 8   | YNDK.    | 3.       | EV:Q30.Squat 30 minutes or more during single day, past 30 days                                                        |
| 1162 | V00PA430   | Num  | 8   | YNDK.    | 3.       | EV:Q32.Lift or move objects weighing 25 pounds or more by hand during single day, past 30 days                         |
| 1161 | V00PA530   | Num  | 8   | YNDK.    | 3.       | EV:Q31.Get in and out of squatting position 10 or more times during single day, past 30 days                           |
| 1207 | V00PA130CV | Num  | 8   | FREQ2Z.  |          | EV:Q33a.How often climb up total of 10 or more flights of stairs during typical week, past 30 days (calc)              |
| 1164 | V00PA130NM | Num  | 8   | FREQ10X. | 3.       | EV:Q34.How many flights of stairs have you climbed up, past 7 days (one flight equals 10 steps)                        |
| 1203 | V00PA230CV | Num  | 8   | FREQ2Z.  |          | EV:Q29a.How often kneel 30 minutes or more during typical week, past 30 days (calc)                                    |
| 1204 | V00PA330CV | Num  | 8   | FREQ2Z.  |          | EV:Q30a.How often squat for 30 minutes or more during typical week, past 30 days (calc)                                |
| 1206 | V00PA430CV | Num  | 8   | FREQ2Z.  |          | EV:Q32a.How often lift or move objects weighing 25 pounds or more by hand during a typical week, past 30 days (calc)   |
| 1205 | V00PA530CV | Num  | 8   | FREQ2Z.  |          | EV:Q31a.How often get in and out of squatting position 10 or more times during a typical week, past 30 days (calc)     |
| 1208 | V00PASE    | Num  | 8   |          |          | EV:Physical Activity Scale for the Elderly (PASE) score (calc)                                                         |
| 1165 | V00PASE1   | Num  | 8   | TIME10X. | 3.       | EV:Leisure activities: sitting, past 7 days                                                                            |
| 1167 | V00PASE2   | Num  | 8   | TIME10X. | 3.       | EV:Leisure activities: walking, past 7 days                                                                            |
| 1169 | V00PASE3   | Num  | 8   | TIME10X. | 3.       | EV:Leisure activities: light sport/ recreation, past 7 days                                                            |
| 1171 | V00PASE4   | Num  | 8   | TIME10X. | 3.       | EV:Leisure activities: moderate sport/ recreation, past 7 days                                                         |
| 1173 | V00PASE5   | Num  | 8   | TIME10X. | 3.       | EV:Leisure activities: strenuous sport/ recreation, past 7 days                                                        |
| 1175 | V00PASE6   | Num  | 8   | TIME10X. | 3.       | EV:Leisure activities: muscle strength/ endurance, past 7 days                                                         |
| 1166 | V00PASE1HR | Num  | 8   | TIME18X. | 3.       | EV:Leisure activities: sitting, hours per day, past 7 days                                                             |

## The CONTENTS Procedure

## Alphabetic List of Variables and Attributes

| #    | Variable   | Type | Len | Format   | Informat | Label                                                                                   |
|------|------------|------|-----|----------|----------|-----------------------------------------------------------------------------------------|
| 1168 | V00PASE2HR | Num  | 8   | TIME18X. | 3.       | EV:Leisure activities: walking, hours per day, past 7 days                              |
| 1170 | V00PASE3HR | Num  | 8   | TIME18X. | 3.       | EV:Leisure activities: light sport/ recreation, hours per day, past 7 days              |
| 1172 | V00PASE4HR | Num  | 8   | TIME18X. | 3.       | EV:Leisure activities: moderate sport/ recreation, hours per day, past 7 days           |
| 1174 | V00PASE5HR | Num  | 8   | TIME18X. | 3.       | EV:Leisure activities: strenuous sport/ recreation, hours per day, past 7 days          |
| 1176 | V00PASE6HR | Num  | 8   | TIME18X. | 3.       | EV:Leisure activities: muscle strength/ endurance, hours per day, past 7 days           |
| 879  | V00PCTALCH | Num  | 8   |          |          | SAQ:Block Brief 2000: daily percent of calories from alcoholic beverages (kcal) (calc)  |
| 826  | V00PCTCARB | Num  | 8   |          |          | SAQ:Block Brief 2000: daily percent of calories from carbohydrate (kcal) (calc)         |
| 812  | V00PCTCOL1 | Num  | 8   |          |          | SAQ:Block Brief 2000: error flag, percent of foods marked as never (calc)               |
| 818  | V00PCTCOL9 | Num  | 8   |          |          | SAQ:Block Brief 2000: error flag, percent of foods marked as every day (calc)           |
| 875  | V00PCTFAT  | Num  | 8   |          |          | SAQ:Block Brief 2000: daily percent of calories from fat (kcal) (calc)                  |
| 882  | V00PCTLARG | Num  | 8   |          |          | SAQ:Block Brief 2000: error flag, percent of foods marked as large portion (calc)       |
| 887  | V00PCTMEDS | Num  | 8   |          |          | SAQ:Block Brief 2000: error flag, percent of foods marked as medium portion (calc)      |
| 869  | V00PCTPROT | Num  | 8   |          |          | SAQ:Block Brief 2000: daily percent of calories from protein (kcal) (calc)              |
| 853  | V00PCTSMAL | Num  | 8   |          |          | SAQ:Block Brief 2000: error flag, percent of foods marked as small portion (calc)       |
| 827  | V00PCTSWT  | Num  | 8   |          |          | SAQ:Block Brief 2000: daily percent of calories from sweets, desserts (kcal) (calc)     |
| 816  | V00PCTXLS  | Num  | 8   |          |          | SAQ:Block Brief 2000: error flag, percent of foods marked as extra large portion (calc) |
| 100  | V00PDATE1  | Num  | 8   |          |          | EV:Phlebotomy: date of blood draw (first draw) (calc)                                   |
| 99   | V00PDATE2  | Num  | 8   |          |          | EV:Phlebotomy: date of blood draw (repeat draw) (calc)                                  |
| 450  | V00PIPE    | Num  | 8   | YNDK.    | 3.       | SAQ:Q40.Ever smoked pipe, cigars or cigarillos                                          |
| 451  | V00PIPEAGE | Num  | 8   | 3.       | 3.       | SAQ:Q40a.How old when first started smoking pipe, cigars or cigarillos fairly regularly |
| 454  | V00PIPEAMT | Num  | 8   | 3.       | 3.       | SAQ:Q40bi.About how many pipes, cigars or cigarillos smoke per week                     |

## The CONTENTS Procedure

## Alphabetic List of Variables and Attributes

| #    | Variable   | Type | Len | Format    | Informat | Label                                                                                                                              |
|------|------------|------|-----|-----------|----------|------------------------------------------------------------------------------------------------------------------------------------|
| 452  | V00PIPENEV | Num  | 8   | YNDK.     | 3.       | SAQ:Q40a.Never smoked pipes, cigars or cigarillos regularly                                                                        |
| 453  | V00PIPENOW | Num  | 8   | YNDK.     | 3.       | SAQ:Q40b.Smoke pipe or cigar now                                                                                                   |
| 455  | V00PIPSTOP | Num  | 8   | 3.        | 3.       | SAQ:Q40bii.How old when stopped smoking pipe, cigars or cigarillos                                                                 |
| 11   | V00PLAQHR1 | Num  | 8   |           |          | EV:Laboratory processing: time at start of plasma aliquoting (first draw, 24- hr time) (calc)                                      |
| 12   | V00PLAQHR2 | Num  | 8   |           |          | EV:Laboratory processing: time at start of plasma aliquoting (repeat draw, 24- hour time) (calc)                                   |
| 1009 | V00PN400W  | Num  | 8   | YNDK.     | 2.       | EV:Q12a.400- meter walk: type of discomfort, pain                                                                                  |
| 486  | V00PNMEDT  | Num  | 8   | YNDK.     | 3.       | EV:Q51.Take any pain medication today (include both prescription and over- the- counter medications for any type of pain)          |
| 420  | V00POLYRH  | Num  | 8   | YNDK.     | 3.       | SAQ:Q28.Charlson Comorbidity: have polymyalgia rheumatica                                                                          |
| 551  | V00PSMKYR  | Num  | 8   |           |          | SAQ:Years of smoking pipe, cigars or cigarillos (calc)                                                                             |
| 550  | V00PSMOKER | Num  | 8   | SMOKE.    |          | SAQ:Smoking status for pipe, cigars or cigarillos (calc)                                                                           |
| 498  | V00PTH     | Num  | 8   | YNDK.     | 3.       | EV:Q57.Used parathyroid hormone or PTH (includes Forteo, or teriparatide, given by injection) to treat osteoporosis, past 6 months |
| 499  | V00PTHUSE  | Num  | 8   | MEDDUR2X. | 3.       | EV:Q57a.Last time had parathyroid hormone or PTH injection, past 6 months                                                          |
| 21   | V00QOVP1   | Num  | 8   | LAB2X.    |          | EV:Phlebotomy: quality of venipuncture (first draw) (calc)                                                                         |
| 22   | V00QOVP2   | Num  | 8   | LAB2X.    |          | EV:Phlebotomy: quality of venipuncture (repeat draw) (calc)                                                                        |
| 418  | V00RA      | Num  | 8   | YNDK.     | 3.       | SAQ:Q26.Charlson Comorbidity: have rheumatoid arthritis                                                                            |
| 419  | V00RAMEDS  | Num  | 8   | YNDK.     | 3.       | SAQ:Q26a.Charlson Comorbidity: take medicines for rheumatoid arthritis regularly                                                   |
| 913  | V00RCSTFID | Char | 4   | \$4.      | \$4.     | EV:Repeated chair stands: staff ID #                                                                                               |
| 990  | V00REASW1  | Num  | 8   | YNDK.     | 2.       | EV:Q11a.400- meter walk: not able to complete 10 laps, excluded based on eligibility criteria                                      |
| 991  | V00REASW2  | Num  | 8   | YNDK.     | 2.       | EV:Q11a.400- meter walk: not able to complete 10 laps, began walk but could not complete                                           |
| 992  | V00REASW3  | Num  | 8   | YNDK.     | 2.       | EV:Q11a.400- meter walk: not able to complete 10 laps, heart rate exceeded 135 bpm during walk and did not feel well               |

## The CONTENTS Procedure

## Alphabetic List of Variables and Attributes

| #    | Variable   | Type | Len | Format  | Informat | Label                                                                                                                                                |
|------|------------|------|-----|---------|----------|------------------------------------------------------------------------------------------------------------------------------------------------------|
| 993  | V00REASW4  | Num  | 8   | YNDK.   | 2.       | EV:Q11a.400- meter walk: not able to complete 10 laps, heart rate fell below 40 bpm during walk                                                      |
| 994  | V00REASW5  | Num  | 8   | YNDK.   | 2.       | EV:Q11a.400- meter walk: not able to complete 10 laps, reported felt too tired during walk                                                           |
| 995  | V00REASW6  | Num  | 8   | YNDK.   | 2.       | EV:Q11a.400- meter walk: not able to complete 10 laps, reported chest pain during walk                                                               |
| 996  | V00REASW7  | Num  | 8   | YNDK.   | 2.       | EV:Q11a.400- meter walk: not able to complete 10 laps, reported shortness of breath during walk                                                      |
| 997  | V00REASW8  | Num  | 8   | YNDK.   | 2.       | EV:Q11a.400- meter walk: not able to complete 10 laps, reported feeling faint during walk                                                            |
| 998  | V00REASW9  | Num  | 8   | YNDK.   | 2.       | EV:Q11a.400- meter walk: not able to complete 10 laps, reported knee pain during walk                                                                |
| 999  | V00REASW10 | Num  | 8   | YNDK.   | 2.       | EV:Q11a.400- meter walk: not able to complete 10 laps, reported hip pain during walk                                                                 |
| 1000 | V00REASW11 | Num  | 8   | YNDK.   | 2.       | EV:Q11a.400- meter walk: not able to complete 10 laps, reported calf pain during walk                                                                |
| 1001 | V00REASW12 | Num  | 8   | YNDK.   | 2.       | EV:Q11a.400- meter walk: not able to complete 10 laps, reported back pain during walk                                                                |
| 1002 | V00REASW13 | Num  | 8   | YNDK.   | 2.       | EV:Q11a.400- meter walk: not able to complete 10 laps, sat down during walk                                                                          |
| 1003 | V00REASW14 | Num  | 8   | YNDK.   | 2.       | EV:Q11a.400- meter walk: not able to complete 10 laps, more than 15 minutes elapsed from start of test                                               |
| 1004 | V00REASW15 | Num  | 8   | YNDK.   | 3.       | EV:Q11a.400- meter walk: not able to complete 10 laps, refused                                                                                       |
| 1005 | V00REASW16 | Num  | 8   | YNDK.   | 2.       | EV:Q11a.400- meter walk: not able to complete 10 laps, other                                                                                         |
| 524  | V00RELA12  | Num  | 8   | YNDK.   | 3.       | EV:Q66.CAM: do relaxation or mind- body activities, such as meditation, deep breathing or visualization, for arthritis or joint pain, past 12 months |
| 576  | V00RELACV  | Num  | 8   | YNDK.   |          | EV:Q66a.CAM: currently do relaxation or mind- body activities for arthritis or joint pain (calc)                                                     |
| 975  | V00RESTT1  | Num  | 8   | WALK1Z. | 2.       | EV:Q3a.400- meter walk: rest stop #1                                                                                                                 |
| 976  | V00RESTT2  | Num  | 8   | WALK1Z. | 2.       | EV:Q3b.400- meter walk: rest stop #2                                                                                                                 |
| 977  | V00RESTT3  | Num  | 8   | WALK1Z. | 2.       | EV:Q3c.400- meter walk: rest stop #3                                                                                                                 |
| 978  | V00RESTT4  | Num  | 8   | WALK1Z. | 2.       | EV:Q3d.400- meter walk: rest stop #4                                                                                                                 |
| 979  | V00RESTT5  | Num  | 8   | WALK1Z. | 2.       | EV:Q3e.400- meter walk: rest stop #5                                                                                                                 |
| 980  | V00RESTT6  | Num  | 8   | WALK1Z. | 2.       | EV:Q3f.400- meter walk: rest stop #6                                                                                                                 |
| 981  | V00RESTT7  | Num  | 8   | WALK1Z. | 2.       | EV:Q3g.400- meter walk: rest stop #7                                                                                                                 |
| 982  | V00RESTT8  | Num  | 8   | WALK1Z. | 2.       | EV:Q3h.400- meter walk: rest stop #8                                                                                                                 |

## The CONTENTS Procedure

## Alphabetic List of Variables and Attributes

| #    | Variable   | Type | Len | Format  | Informat | Label                                                                                                   |
|------|------------|------|-----|---------|----------|---------------------------------------------------------------------------------------------------------|
| 983  | V00RESTT9  | Num  | 8   | WALK1Z. | 2.       | EV:Q3i.400- meter walk: rest stop #9                                                                    |
| 984  | V00RESTT10 | Num  | 8   | WALK1Z. | 2.       | EV:Q3j.400- meter walk: rest stop #10                                                                   |
| 928  | V00REXCOMP | Num  | 8   | YNDK.   | 3.       | EV:Q8.Isometric strength: right knee extension, able to complete (3) measurements                       |
| 1059 | V00REXP1CV | Num  | 8   | PAIN1Z. |          | EV:Q7a.Isometric strength: right knee extension, severity of pain (calc)                                |
| 1060 | V00REXP2CV | Num  | 8   | EXP.    |          | EV:Q7b.Isometric strength: right knee extension, knee pain prevent from pushing as hard as can (calc)   |
| 927  | V00REXPN   | Num  | 8   | YNDK.   | 3.       | EV:Q7.Isometric strength: right knee extension, any knee pain during test                               |
| 929  | V00REXWHY1 | Num  | 8   | YNDK.   | 2.       | EV:Q8a.Isometric strength: right knee extension, not able to complete measurements, knee pain           |
| 930  | V00REXWHY2 | Num  | 8   | YNDK.   | 2.       | EV:Q8a.Isometric strength: right knee extension, not able to complete measurements, equipment problems  |
| 931  | V00REXWHY3 | Num  | 8   | YNDK.   | 2.       | EV:Q8a.Isometric strength: right knee extension, not able to complete measurements, participant fatigue |
| 932  | V00REXWHY4 | Num  | 8   | YNDK.   | 2.       | EV:Q8a.Isometric strength: right knee extension, not able to complete measurements, participant refused |
| 933  | V00REXWHY5 | Num  | 8   | YNDK.   | 2.       | EV:Q8a.Isometric strength: right knee extension, not able to complete measurements, other               |
| 1019 | V00RFP400W | Num  | 8   | YNDK.   | 3.       | EV:Q13.400- meter walk: knee pain during walk, refused                                                  |
| 935  | V00RFXCOMP | Num  | 8   | YNDK.   | 3.       | EV:Q11.Isometric strength: right knee flexion, able to complete (3) measurements                        |
| 1061 | V00RFXP1CV | Num  | 8   | PAIN1Z. |          | EV:Q10a.Isometric strength: right knee flexion, severity of pain (calc)                                 |
| 1062 | V00RFXP2CV | Num  | 8   | FXP.    |          | EV:Q10b.Isometric strength: right knee flexion, pain prevent from pulling as hard as can (calc)         |
| 934  | V00RFXPN   | Num  | 8   | YNDK.   | 3.       | EV:Q10.Isometric strength: right knee flexion, any knee pain during test                                |
| 936  | V00RFXWHY1 | Num  | 8   | YNDK.   | 2.       | EV:Q11a.Isometric strength: right knee flexion, not able to complete measurements, knee pain            |
| 937  | V00RFXWHY2 | Num  | 8   | YNDK.   | 2.       | EV:Q11a.Isometric strength: right knee flexion, not able to complete measurements, equipment problems   |
| 938  | V00RFXWHY3 | Num  | 8   | YNDK.   | 2.       | EV:Q11a.Isometric strength: right knee flexion, not able to complete measurements, participant fatigue  |
| 939  | V00RFXWHY4 | Num  | 8   | YNDK.   | 2.       | EV:Q11a.Isometric strength: right knee flexion, not able to complete measurements, participant refused  |

## The CONTENTS Procedure

## Alphabetic List of Variables and Attributes

| #    | Variable   | Type | Len | Format   | Informat | Label                                                                                                    |
|------|------------|------|-----|----------|----------|----------------------------------------------------------------------------------------------------------|
| 940  | V00RFXWHY5 | Num  | 8   | YNDK.    | 2.       | EV:Q11a.Isometric strength: right knee flexion, not able to complete measurements, other                 |
| 1031 | V00RKABPN  | Num  | 8   | YNDK.    | 3.       | EV:Right knee exam: anserine bursa, pain/ tenderness present on exam                                     |
| 1072 | V00RKALNMT | Num  | 8   |          |          | EV:Right knee exam: alignment, degrees (valgus negative) (calc)                                          |
| 1023 | V00RKEFFB  | Num  | 8   | YNDK.    | 3.       | EV:Right knee exam: effusion, bulge sign positive                                                        |
| 1024 | V00RKEFFPT | Num  | 8   | YNDK10B. | 3.       | EV:Right knee exam: effusion, patellar tap positive                                                      |
| 1070 | V00RKFHDEG | Num  | 8   |          |          | EV:Right knee exam: flexion contracture/ hyperextension, degrees (contracture positive) (calc)           |
| 1029 | V00RKLTPN  | Num  | 8   | YNDK.    | 3.       | EV:Right knee exam: lateral tibiofemoral pain/ tenderness present on exam                                |
| 1030 | V00RKMTTPN | Num  | 8   | YNDK.    | 3.       | EV:Right knee exam: medial tibiofemoral pain/ tenderness present on exam                                 |
| 1021 | V00RKPATPN | Num  | 8   | YNDK.    | 3.       | EV:Right knee exam: patellar quadriceps tendinitis, pain/ tenderness at any four sites                   |
| 1035 | V00RKPFCRE | Num  | 8   | YNDK.    | 3.       | EV:Right knee exam: patello- femoral crepitus present on exam                                            |
| 1037 | V00RKPGDPN | Num  | 8   | YNDK.    | 3.       | EV:Right knee exam: patellar grind, painful or tender behind knee cap                                    |
| 1027 | V00RKRFXP  | Num  | 8   | YNDK.    | 2.       | EV:Right knee exam: knee flexion pain/ tenderness present on exam                                        |
| 924  | V00RLARM   | Num  | 8   | 5.1      | 5.1      | EV:Q4b.Isometric strength: right leg chair and transducer settings, arm support (cm)                     |
| 923  | V00RLBACK  | Num  | 8   | 5.1      | 5.1      | EV:Q4a.Isometric strength: right leg chair and transducer settings, back support (cm)                    |
| 925  | V00RLHORIZ | Num  | 8   | 5.1      | 5.1      | EV:Q4c.Isometric strength: right leg chair and transducer settings, horizontal bar (knee angle fix) (cm) |
| 922  | V00RLLGTH  | Num  | 8   | 5.1      | 5.1      | EV:Q3.Isometric strength: right leg length from transducer to joint line (cm)                            |
| 926  | V00RLVERT  | Num  | 8   | 5.1      | 5.1      | EV:Q4d.Isometric Strength: right leg chair and transducer settings, vertical bar (height) (cm)           |
| 1040 | V00RLWGT   | Num  | 8   | 3.       | 3.       | EV:Q5.Isometric strength: right leg weight (N)                                                           |
| 908  | V00RPAVG   | Num  | 8   | 4.       | 4.       | EV:Radial pulse: average beats per minute                                                                |
| 1011 | V00RPN400W | Num  | 8   | YNDK.    | 2.       | EV:Q13.400- meter walk: right knee pain during walk                                                      |
| 907  | V00RPSTFID | Char | 4   | \$4.     | \$4.     | EV:Radial pulse: staff ID #                                                                              |
| 1013 | V00RPWKPRV | Num  | 8   | YNDK.    | 3.       | EV:Q13ii.400- meter walk: right knee pain prevent from walking at usual pace                             |



## The CONTENTS Procedure

## Alphabetic List of Variables and Attributes

| #    | Variable   | Type | Len | Format  | Informat | Label                                                                                                                                        |
|------|------------|------|-----|---------|----------|----------------------------------------------------------------------------------------------------------------------------------------------|
| 1012 | V00RPWKTYP | Num  | 8   | PAIN1Z. | 3.       | EV:Q13i.400- meter walk: right knee pain mild, moderate or severe                                                                            |
| 571  | V00RUBCV   | Num  | 8   | YNDK.   |          | EV:Q63a.CAM: currently using rubs, lotions, liniments, creams or oils for arthritis or joint pain (calc)                                     |
| 521  | V00RUBS12  | Num  | 8   | YNDK.   | 3.       | EV:Q63.CAM: used rubs, lotions, liniments, creams or oils, such as tiger balm or horse liniment, for arthritis or joint pain, past 12 months |
| 526  | V00RX30    | Num  | 8   | MEDS.   | 2.       | EV:Q49.MIF: bring in or identify all prescription medications taken, past 30 days                                                            |
| 527  | V00RX30NUM | Num  | 8   | 3.      | 3.       | EV:Q49a.MIF: total number of medications recorded                                                                                            |
| 592  | V00RXACTM  | Num  | 8   | MED30D. |          | EV:MIF: Rx Acetaminophen use indicator (calc)                                                                                                |
| 578  | V00RXANALG | Num  | 8   | MED30D. |          | EV:MIF: Rx Analgesic use indicator (calc)                                                                                                    |
| 596  | V00RXASPRN | Num  | 8   | MED30D. |          | EV:MIF: Rx Aspirin use indicator (calc)                                                                                                      |
| 582  | V00RXBISPH | Num  | 8   | MED30D. |          | EV:MIF: Rx Bisphosphonate use indicator (calc)                                                                                               |
| 589  | V00RXCHOND | Num  | 8   | MED30D. |          | EV:MIF: Rx Chondroitin sulfate use indicator (calc)                                                                                          |
| 581  | V00RXCLCTN | Num  | 8   | MED30D. |          | EV:MIF: Rx Calcitonin use indicator (calc)                                                                                                   |
| 601  | V00RXCLCXB | Num  | 8   | MED30D. |          | EV:MIF: Rx Celecoxib use indicator (calc)                                                                                                    |
| 588  | V00RXCOX2  | Num  | 8   | MED30D. |          | EV:MIF: Rx COX- II inhibitor use indicator (calc)                                                                                            |
| 580  | V00RXFLUOR | Num  | 8   | MED30D. |          | EV:MIF: Rx Fluoride use indicator (calc)                                                                                                     |
| 591  | V00RXGLCSM | Num  | 8   | MED30D. |          | EV:MIF: Rx Glucosamine use indicator (calc)                                                                                                  |
| 584  | V00RXIHIAL | Num  | 8   | MED30D. |          | EV:MIF: Rx Injected hyaluronic acid use indicator (calc)                                                                                     |
| 587  | V00RXISTRD | Num  | 8   | MED30D. |          | EV:MIF: Rx Injected corticosteroid use indicator (calc)                                                                                      |
| 593  | V00RXMSM   | Num  | 8   | MED30D. |          | EV:MIF: Rx Methylsulfonylmethane use indicator (calc)                                                                                        |
| 586  | V00RXNARC  | Num  | 8   | MED30D. |          | EV:MIF: Rx Narcotic analgesic use indicator (calc)                                                                                           |
| 595  | V00RXNSAID | Num  | 8   | MED30D. |          | EV:MIF: Rx NSAID use indicator (calc)                                                                                                        |
| 597  | V00RXNTRAT | Num  | 8   | MED30D. |          | EV:MIF: Rx Nitrate use indicator (calc)                                                                                                      |
| 600  | V00RXOSTRD | Num  | 8   | MED30D. |          | EV:MIF: Rx Oral corticosteroid use indicator (calc)                                                                                          |
| 590  | V00RXOTHAN | Num  | 8   | MED30D. |          | EV:MIF: Rx Other analgesic use indicator (calc)                                                                                              |
| 598  | V00RXRALOX | Num  | 8   | MED30D. |          | EV:MIF: Rx Raloxifene use indicator (calc)                                                                                                   |
| 585  | V00RXRFCXB | Num  | 8   | MED30D. |          | EV:MIF: Rx Rofecoxib use indicator (calc)                                                                                                    |
| 603  | V00RXSALIC | Num  | 8   | MED30D. |          | EV:MIF: Rx Salicylate use indicator (calc)                                                                                                   |
| 604  | V00RXSAME  | Num  | 8   | MED30D. |          | EV:MIF: Rx S- adenosylmethionine use indicator (calc)                                                                                        |

## The CONTENTS Procedure

## Alphabetic List of Variables and Attributes

| #   | Variable   | Type | Len | Format   | Informat | Label                                                                                                                                  |
|-----|------------|------|-----|----------|----------|----------------------------------------------------------------------------------------------------------------------------------------|
| 602 | V00RXTPRTD | Num  | 8   | MED30D.  |          | EV:MIF: Rx Teriparatide use indicator (calc)                                                                                           |
| 599 | V00RXVIT_D | Num  | 8   | MED30D.  |          | EV:MIF: Rx Vitamin D use indicator (calc)                                                                                              |
| 579 | V00RXVLCXB | Num  | 8   | MED30D.  |          | EV:MIF: Rx Valdecoxib use indicator (calc)                                                                                             |
| 973 | V00SAFEWLK | Num  | 8   | YNDK.    | 3.       | EV:Q12.400- meter walk eligibility: feel it would be safe to try to walk up and down hallway                                           |
| 483 | V00SAME    | Num  | 8   | YNDK.    | 3.       | EV:Q50f.Used SAME (S- adenosylmethionine) for joint pain or arthritis more than half the days of the month, past 30 days               |
| 911 | V00SCSTFID | Char | 4   | \$4.     | \$4.     | EV:Single chair stand: staff ID #                                                                                                      |
| 9   | V00SEAQHR1 | Num  | 8   |          |          | EV:Laboratory processing: time at start of serum aliquoting (first draw, 24- hour time) (calc)                                         |
| 10  | V00SEAQHR2 | Num  | 8   |          |          | EV:Laboratory processing: time at start of serum aliquoting (repeat draw, 24- hour time) (calc)                                        |
| 109 | V00SERUM   | Num  | 8   | BSCOLL.  |          | EV:Phlebotomy: which draw(s) serum obtained at (calc)                                                                                  |
| 166 | V00SF1     | Num  | 8   | STAT.    | 3.       | SAQ:Q10.SF- 12: in general, how is health                                                                                              |
| 167 | V00SF2     | Num  | 8   | ACTIV3X. | 3.       | SAQ:Q11a.SF- 12: how much health limit involvement in moderate activities (e.g., moving a table, pushing vacuum cleaner)..             |
| 168 | V00SF3     | Num  | 8   | ACTIV3X. | 3.       | SAQ:Q11b.SF- 12: how much health limit climbing several flights of stairs                                                              |
| 169 | V00SF4     | Num  | 8   | TIME6X.  | 3.       | SAQ:Q12a.SF- 12: how often physical health result in accomplishing less than would like with work or other activities, past 4 weeks    |
| 170 | V00SF5     | Num  | 8   | TIME6X.  | 3.       | SAQ:Q12b.SF- 12: how often physical health result in being limited in kind of work or other activities, past 4 weeks                   |
| 171 | V00SF6     | Num  | 8   | TIME6X.  | 3.       | SAQ:Q13a.SF- 12: how often emotional problems result in accomplishing less than would like with work or other activities, past 4 weeks |
| 172 | V00SF7     | Num  | 8   | TIME6X.  | 3.       | SAQ:Q13b.SF- 12: how often emotional problems result in not doing work or activities as carefully as usual, past 4 weeks               |
| 173 | V00SF8     | Num  | 8   | RATE9X.  | 3.       | SAQ:Q14.SF- 12: how much did pain interfere with normal work (include work outside home and housework), past 4 weeks                   |
| 174 | V00SF9     | Num  | 8   | TIME6X.  | 3.       | SAQ:Q15a.SF- 12: how often felt calm and peaceful, past 4 weeks                                                                        |
| 175 | V00SF10    | Num  | 8   | TIME6X.  | 3.       | SAQ:Q15b.SF- 12: how often had a lot of energy, past 4 weeks                                                                           |
| 176 | V00SF11    | Num  | 8   | TIME6X.  | 3.       | SAQ:Q15c.SF- 12: how often felt downhearted and depressed, past 4 weeks                                                                |

## The CONTENTS Procedure

## Alphabetic List of Variables and Attributes

| #    | Variable   | Type | Len | Format  | Informat | Label                                                                                                                                                 |
|------|------------|------|-----|---------|----------|-------------------------------------------------------------------------------------------------------------------------------------------------------|
| 177  | V00SF12    | Num  | 8   | TIME6X. | 3.       | SAQ:Q16.SF- 12: how often physical health or emotional problems interfered with social activities (like visiting with friends...), past 4 weeks       |
| 801  | V00SLNMCV  | Num  | 8   | FFQ16X. |          | SAQ:Block Brief 2000: Selenium alone, how often past 12 months (calc)                                                                                 |
| 444  | V00SMKAGE  | Num  | 8   | 3.      | 3.       | SAQ:Q39a.How old when first started smoking cigarettes fairly regularly                                                                               |
| 448  | V00SMKAMT  | Num  | 8   | 3.      | 3.       | SAQ:Q39ci.About how many cigarettes smoke per day                                                                                                     |
| 446  | V00SMKAVE  | Num  | 8   | 3.      | 3.       | SAQ:Q39b.On average of entire time have smoked, how many cigarettes did usually smoke per day                                                         |
| 445  | V00SMKNEV  | Num  | 8   | YNDK.   | 3.       | SAQ:Q39a.Never smoked cigarettes regularly                                                                                                            |
| 447  | V00SMKNOW  | Num  | 8   | YNDK.   | 3.       | SAQ:Q39c.Smoke cigarettes now                                                                                                                         |
| 549  | V00SMKPKYR | Num  | 8   |         |          | SAQ:Pack- years of smoking cigarettes (calc)                                                                                                          |
| 449  | V00SMKSTOP | Num  | 8   | 3.      | 3.       | SAQ:Q39cii.How old when stopped smoking                                                                                                               |
| 443  | V00SMOKE   | Num  | 8   | YNDK.   | 3.       | SAQ:Q39.Have you smoked at least 100 cigarettes (5 packs) in entire life                                                                              |
| 548  | V00SMOKER  | Num  | 8   | SMOKE.  |          | SAQ:Smoking status for cigarettes (calc)                                                                                                              |
| 1007 | V00SOB400W | Num  | 8   | YNDK.   | 2.       | EV:Q12a.400- meter walk: type of discomfort, shortness of breath                                                                                      |
| 525  | V00SPIR12  | Num  | 8   | YNDK.   | 3.       | EV:Q67.CAM: do spiritual activities (e.g., prayer, laying on of hands, healing circles, or faith healing) for arthritis or joint pain, past 12 months |
| 577  | V00SPIRCV  | Num  | 8   | YNDK.   |          | EV:Q67a.CAM: currently do any type of spiritual activities for arthritis or joint pain (calc)                                                         |
| 426  | V00SPNFX   | Num  | 8   | YNDK.   | 3.       | SAQ:Q31.Doctor ever said you fractured spine or vertebrae                                                                                             |
| 427  | V00SPNFXAG | Num  | 8   | 3.      | 3.       | SAQ:Q31a.How old when doctor first said you fractured spine or vertebrae                                                                              |
| 870  | V00SRVDRY  | Num  | 8   |         |          | SAQ:Block Brief 2000: daily servings of milk, yogurt and cheese (calc)                                                                                |
| 809  | V00SRVFAT  | Num  | 8   |         |          | SAQ:Block Brief 2000: daily servings of fats, oils, sweets and sodas (calc)                                                                           |
| 831  | V00SRVFRT  | Num  | 8   |         |          | SAQ:Block Brief 2000: daily servings of fruits and fruit juices (calc)                                                                                |
| 830  | V00SRVGRN  | Num  | 8   |         |          | SAQ:Block Brief 2000: daily servings of bread, cereals, rice and pasta (calc)                                                                         |
| 864  | V00SRVMEAT | Num  | 8   |         |          | SAQ:Block Brief 2000: daily servings of meat, fish, poultry, beans and eggs (calc)                                                                    |

## The CONTENTS Procedure

## Alphabetic List of Variables and Attributes

| #   | Variable   | Type | Len | Format  | Informat | Label                                                                                                                                   |
|-----|------------|------|-----|---------|----------|-----------------------------------------------------------------------------------------------------------------------------------------|
| 860 | V00SRVVEG  | Num  | 8   |         |          | SAQ:Block Brief 2000: daily servings of vegetables (calc)                                                                               |
| 963 | V00STEPST1 | Num  | 8   | 3.      | 3.       | EV:Q1.20- meter walk: trial 1 number of steps                                                                                           |
| 966 | V00STEPST2 | Num  | 8   | 3.      | 3.       | EV:Q2.20- meter walk: trial 2 number of steps                                                                                           |
| 491 | V00STERKN  | Num  | 8   | LRB1X.  | 3.       | EV:Q53bi.Which knee, injection of steroids, past 6 months                                                                               |
| 561 | V00STINJCV | Num  | 8   | YNDK.   |          | EV:Q53b.Either knee, steroid injection (cortisone/ corticosteroid), past 6 months (calc)                                                |
| 556 | V00STRINJL | Num  | 8   | INJECT. |          | EV:Left knee steroid injection, past 6 months (calc)                                                                                    |
| 555 | V00STRINJR | Num  | 8   | INJECT. |          | EV:Right knee steroid injection, past 6 months (calc)                                                                                   |
| 399 | V00STROKE  | Num  | 8   | YNDK.   | 3.       | SAQ:Q20.Charlson Comorbidity: had stroke, cerebrovascular accident, blood clot or bleeding in brain, or transient ischemic attack (TIA) |
| 792 | V00STRTBCV | Num  | 8   | FFQ16X. |          | SAQ:Block Brief 2000: Stress- tabs or B- Complex type multivitamins, how often past 12 months (calc)                                    |
| 872 | V00SUPB1   | Num  | 8   |         |          | SAQ:Block Brief 2000: average daily nutrients from vitamin supplements, B1 (mg) (calc)                                                  |
| 817 | V00SUPB2   | Num  | 8   |         |          | SAQ:Block Brief 2000: average daily nutrients from vitamin supplements, B2 (mg) (calc)                                                  |
| 845 | V00SUPB6   | Num  | 8   |         |          | SAQ:Block Brief 2000: average daily nutrients from vitamin supplements, B6 (mg) (calc)                                                  |
| 807 | V00SUPB12  | Num  | 8   |         |          | SAQ:Block Brief 2000: average daily nutrients from vitamin supplements, B12 (ug) (calc)                                                 |
| 840 | V00SUPBCAR | Num  | 8   |         |          | SAQ:Block Brief 2000: average daily nutrients from vitamin supplements, beta- carotene (ug) (calc)                                      |
| 829 | V00SUPCA   | Num  | 8   |         |          | SAQ:Block Brief 2000: average daily nutrients from vitamin supplements, calcium (mg) (calc)                                             |
| 855 | V00SUPCU   | Num  | 8   |         |          | SAQ:Block Brief 2000: average daily nutrients from vitamin supplements, copper (mg) (calc)                                              |
| 854 | V00SUPFE   | Num  | 8   |         |          | SAQ:Block Brief 2000: average daily nutrients from vitamin supplements, iron (mg) (calc)                                                |
| 832 | V00SUPFOL  | Num  | 8   |         |          | SAQ:Block Brief 2000: average daily nutrients from vitamin supplements, folate (mcg) (calc)                                             |
| 862 | V00SUPMG   | Num  | 8   |         |          | SAQ:Block Brief 2000: average daily nutrients from vitamin supplements, magnesium (mg) (calc)                                           |
| 822 | V00SUPNIAC | Num  | 8   |         |          | SAQ:Block Brief 2000: average daily nutrients from vitamin supplements, niacin (mg) (calc)                                              |

## The CONTENTS Procedure

## Alphabetic List of Variables and Attributes

| #    | Variable   | Type | Len | Format    | Informat | Label                                                                                                                          |
|------|------------|------|-----|-----------|----------|--------------------------------------------------------------------------------------------------------------------------------|
| 873  | V00SUPSE   | Num  | 8   |           |          | SAQ:Block Brief 2000: average daily nutrients from vitamin supplements, selenium (mcg) (calc)                                  |
| 844  | V00SUPVITA | Num  | 8   |           |          | SAQ:Block Brief 2000: average daily nutrients from vitamin supplements, vitamin A (IU) (calc)                                  |
| 838  | V00SUPVITC | Num  | 8   |           |          | SAQ:Block Brief 2000: average daily nutrients supplements, vitamin C (mg) (calc)                                               |
| 805  | V00SUPVITD | Num  | 8   |           |          | SAQ:Block Brief 2000: average daily nutrients from vitamin supplements, vitamin D (IU) (calc)                                  |
| 821  | V00SUPVITE | Num  | 8   |           |          | SAQ:Block Brief 2000: average daily nutrients from vitamin supplements, vitamin E (a- TE) (calc)                               |
| 859  | V00SUPZINC | Num  | 8   |           |          | SAQ:Block Brief 2000: average daily nutrients from vitamin supplements, zinc (mg) (calc)                                       |
| 1102 | V00SYSELG  | Num  | 8   | EXCL.     |          | EV:400- meter walk eligibility: meets new or old systolic blood pressure exclusion criterion (calc)                            |
| 492  | V00TEST    | Num  | 8   | YNDK.     | 3.       | EV:Q54.Used male hormone or testosterone (injection, patch, or rubbed on skin) (men only), past 6 months                       |
| 493  | V00TESTUSE | Num  | 8   | MEDDUR2X. | 3.       | EV:Q54a.Last time used male hormone or testosterone (men only), past 6 months                                                  |
| 964  | V00TIMET1  | Num  | 8   | 6.2       | 6.2      | EV:Q1.20- meter walk: trial 1 time to complete (sec.hundredths/ sec)                                                           |
| 967  | V00TIMET2  | Num  | 8   | 6.2       | 6.2      | EV:Q2.20- meter walk: trial 2 time to complete (sec.hundredths/ sec)                                                           |
| 943  | V00TRANSET | Num  | 8   | YNDK.     | 2.       | EV:Q14.Isometric strength: chair and transducer settings for left leg same as right leg settings                               |
| 478  | V00TYLEN   | Num  | 8   | YNDK.     | 3.       | EV:Q50a.Used Tylenol (Acetaminophen) for joint pain or arthritis more than half the days of the month, past 30 days            |
| 101  | V00UCDATE1 | Num  | 8   |           |          | EV:Urine collection: date of sample collection (first collection) (calc)                                                       |
| 97   | V00UCDATE2 | Num  | 8   |           |          | EV:Urine collection: date of sample collection (repeat collection) (calc)                                                      |
| 406  | V00ULCER   | Num  | 8   | YNDK.     | 3.       | SAQ:Q23.Charlson Comorbidity: have stomach ulcers or peptic ulcer disease                                                      |
| 407  | V00ULCERDX | Num  | 8   | YNDK.     | 3.       | SAQ:Q23a.Charlson Comorbidity: stomach ulcers or peptic ulcer disease diagnosed by endoscopy, upper GI or barium swallow study |
| 5    | V00URINHR1 | Num  | 8   |           |          | EV:Urine collection: time collected (first collection, 24- hr time) (calc)                                                     |
| 6    | V00URINHR2 | Num  | 8   |           |          | EV:Urine collection: time collected (repeat collection, 24- hr time) (calc)                                                    |

## The CONTENTS Procedure

## Alphabetic List of Variables and Attributes

| #   | Variable   | Type | Len | Format  | Informat | Label                                                                                           |
|-----|------------|------|-----|---------|----------|-------------------------------------------------------------------------------------------------|
| 13  | V00URINOB1 | Num  | 8   | YNDK.   |          | EV:Urine collection: specimen obtained (first collection) (calc)                                |
| 14  | V00URINOB2 | Num  | 8   | YNDK.   |          | EV:Urine collection: specimen obtained (repeat collection) (calc)                               |
| 98  | V00URNCOLL | Num  | 8   | BSCOLL. |          | EV:Urine collection: which sample collection(s) specimen obtained at (calc)                     |
| 106 | V00URSURD1 | Num  | 8   |         |          | EV:Urine collection: days between most recent surgery and collection (first collection) (calc)  |
| 104 | V00URSURD2 | Num  | 8   |         |          | EV:Urine collection: days between most recent surgery and collection (repeat collection) (calc) |
| 23  | V00VCOLL1  | Num  | 8   | YNDK.   |          | EV:Phlebotomy: traumatic venipuncture, vein collapse (first draw) (calc)                        |
| 24  | V00VCOLL2  | Num  | 8   | YNDK.   |          | EV:Phlebotomy: traumatic venipuncture, vein collapse (repeat draw) (calc)                       |
| 27  | V00VEIN1   | Num  | 8   | YNDK.   |          | EV:Phlebotomy: traumatic venipuncture, vein hard to get (first draw) (calc)                     |
| 28  | V00VEIN2   | Num  | 8   | YNDK.   |          | EV:Phlebotomy: traumatic venipuncture, vein hard to get (repeat draw) (calc)                    |
| 765 | V00VIT1    | Num  | 8   | YNDK.   | 3.       | SAQ:Regular Once- A- Day/ Centrum/ Thera type multiple vitamins, taken past 30 days             |
| 766 | V00VIT2    | Num  | 8   | YNDK.   | 3.       | SAQ:Stress- tabs/ B- Complex type multiple vitamins, taken past 30 days                         |
| 767 | V00VIT3    | Num  | 8   | YNDK.   | 3.       | SAQ:Antioxidant combination type multiple vitamins, taken past 30 days                          |
| 768 | V00VIT4    | Num  | 8   | YNDK.   | 3.       | SAQ:Vitamin A (not beta- carotene) single vitamin, taken past 30 days                           |
| 769 | V00VIT5    | Num  | 8   | YNDK.   | 3.       | SAQ:Beta- carotene single vitamin, taken past 30 days                                           |
| 770 | V00VIT6    | Num  | 8   | YNDK.   | 3.       | SAQ:Vitamin C single vitamin, taken past 30 days                                                |
| 771 | V00VIT7    | Num  | 8   | YNDK.   | 3.       | SAQ:Vitamin E single vitamin, taken past 30 days                                                |
| 772 | V00VIT8    | Num  | 8   | YNDK.   | 3.       | SAQ:Folic acid, folate single vitamin, taken past 30 days                                       |
| 773 | V00VIT9    | Num  | 8   | YNDK.   | 3.       | SAQ:Calcium or Tums (alone or combined with vitamin D or magnesium), taken past 30 days         |
| 774 | V00VIT10   | Num  | 8   | YNDK.   | 3.       | SAQ:Zinc alone, taken past 30 days                                                              |
| 775 | V00VIT11   | Num  | 8   | YNDK.   | 3.       | SAQ:Iron alone, taken past 30 days                                                              |
| 776 | V00VIT12   | Num  | 8   | YNDK.   | 3.       | SAQ:Selenium alone, taken past 30 days                                                          |
| 777 | V00VIT13   | Num  | 8   | YNDK.   | 3.       | SAQ:Vitamin D (alone or combined with calcium), taken past 30 days                              |

## The CONTENTS Procedure

## Alphabetic List of Variables and Attributes

| #    | Variable   | Type | Len | Format   | Informat | Label                                                                                                                 |
|------|------------|------|-----|----------|----------|-----------------------------------------------------------------------------------------------------------------------|
| 794  | V00VITACV  | Num  | 8   | FFQ16X.  |          | SAQ:Block Brief 2000: Vitamin A (not beta- carotene) single vitamin, how often past 12 months (calc)                  |
| 803  | V00VITCCV  | Num  | 8   | FFQ16X.  |          | SAQ:Block Brief 2000: Vitamin C single vitamin, how often past 12 months (calc)                                       |
| 802  | V00VITDCV  | Num  | 8   | FFQ16X.  |          | SAQ:Block Brief 2000: Vitamin D, alone or with calcium, how often past 12 months (calc)                               |
| 796  | V00VITECV  | Num  | 8   | FFQ16X.  |          | SAQ:Block Brief 2000: Vitamin E single vitamin, how often past 12 months (calc)                                       |
| 519  | V00VITM12  | Num  | 8   | YNDK.    | 3.       | EV:Q61.CAM: use vitamins or minerals, such as selenium or vitamin C or D, for arthritis or joint pain, past 12 months |
| 570  | V00VITMCV  | Num  | 8   | YNDK.    |          | EV:Q61a.CAM: currently using vitamins/ minerals for arthritis or joint pain (calc)                                    |
| 15   | V00VOID1   | Num  | 8   | VOID.    |          | EV:Urine collection: which void(s) collected (first collection) (calc)                                                |
| 16   | V00VOID2   | Num  | 8   | VOID.    |          | EV:Urine collection: which void(s) collected (repeat collection) (calc)                                               |
| 971  | V00W20COMP | Num  | 8   | YNDK.    | 2.       | EV:Q1.400- meter walk eligibility: able to complete trial 1 and trial 2 of the 20- meter walk                         |
| 962  | V00W2STFID | Char | 4   | \$4.     | \$4.     | EV:20- meter walk: staff ID #                                                                                         |
| 970  | V00W4STFID | Char | 4   | \$4.     | \$4.     | EV:400- meter walk: staff ID #                                                                                        |
| 972  | V00WALKER  | Num  | 8   | YNDK.    | 3.       | EV:Q6.400- meter walk eligibility: use walker or quad cane when walk                                                  |
| 1186 | V00WEEKWK  | Num  | 8   | 3.       | 3.       | EV:Q46.About how many weeks worked, past 12 months (include paid vacation weeks as weeks worked)                      |
| 1008 | V00WHE400W | Num  | 8   | YNDK.    | 2.       | EV:Q12a.400- meter walk: type of discomfort, wheezing/ dyspnea                                                        |
| 1226 | V00WKHR7CV | Num  | 8   |          |          | EV:Occupational activities: number of hours worked, past 7 days (calc)                                                |
| 965  | V00WLK20T1 | Num  | 8   | WALK10X. | 3.       | EV:Q1.20- meter walk: trial 1 result                                                                                  |
| 968  | V00WLK20T2 | Num  | 8   | WALK10X. | 3.       | EV:Q2.20- meter walk: trial 2 result                                                                                  |
| 969  | V00WLKAID  | Num  | 8   | YNDK.    | 2.       | EV:Q3.20- meter walk: using walking aid such as cane                                                                  |
| 436  | V00WMNAGE1 | Num  | 8   | YNDK.    | 2.       | SAQ:Q38.Minimum weight: 18- 25 years old                                                                              |
| 437  | V00WMNAGE2 | Num  | 8   | YNDK.    | 2.       | SAQ:Q38.Minimum weight: 26- 29 years old                                                                              |
| 438  | V00WMNAGE3 | Num  | 8   | YNDK.    | 2.       | SAQ:Q38.Minimum weight: 30- 39 years old                                                                              |
| 439  | V00WMNAGE4 | Num  | 8   | YNDK.    | 2.       | SAQ:Q38.Minimum weight: 40- 49 years old                                                                              |
| 440  | V00WMNAGE5 | Num  | 8   | YNDK.    | 2.       | SAQ:Q38.Minimum weight: 50- 59 years old                                                                              |

## The CONTENTS Procedure

## Alphabetic List of Variables and Attributes

| #    | Variable   | Type | Len | Format  | Informat | Label                                                                |
|------|------------|------|-----|---------|----------|----------------------------------------------------------------------|
| 441  | V00WMNAGE6 | Num  | 8   | YNDK.   | 2.       | SAQ:Q38.Minimum weight: 60- 69 years old                             |
| 442  | V00WMNAGE7 | Num  | 8   | YNDK.   | 2.       | SAQ:Q38.Minimum weight: 70 years or older                            |
| 429  | V00WMXAGE1 | Num  | 8   | YNDK.   | 2.       | SAQ:Q36.Maximum weight: 18- 25 years old                             |
| 430  | V00WMXAGE2 | Num  | 8   | YNDK.   | 2.       | SAQ:Q36.Maximum weight: 26- 29 years old                             |
| 431  | V00WMXAGE3 | Num  | 8   | YNDK.   | 2.       | SAQ:Q36.Maximum weight: 30- 39 years old                             |
| 432  | V00WMXAGE4 | Num  | 8   | YNDK.   | 2.       | SAQ:Q36.Maximum weight: 40- 49 years old                             |
| 433  | V00WMXAGE5 | Num  | 8   | YNDK.   | 2.       | SAQ:Q36.Maximum weight: 50- 59 years old                             |
| 434  | V00WMXAGE6 | Num  | 8   | YNDK.   | 2.       | SAQ:Q36.Maximum weight: 60- 69 years old                             |
| 435  | V00WMXAGE7 | Num  | 8   | YNDK.   | 2.       | SAQ:Q36.Maximum weight: 70 years or older                            |
| 273  | V00WOMADLL | Num  | 8   | 5.1     |          | EV:Left knee: WOMAC Disability Score (calc)                          |
| 268  | V00WOMADLR | Num  | 8   | 5.1     |          | EV:Right knee: WOMAC Disability Score (calc)                         |
| 269  | V00WOMKPL  | Num  | 8   | 5.1     |          | EV:Left knee: WOMAC Pain Score (calc)                                |
| 264  | V00WOMKPR  | Num  | 8   | 5.1     |          | EV:Right knee: WOMAC Pain Score (calc)                               |
| 271  | V00WOMSTFL | Num  | 8   | 5.1     |          | EV:Left knee: WOMAC Stiffness Score (calc)                           |
| 266  | V00WOMSTFR | Num  | 8   | 5.1     |          | EV:Right knee: WOMAC Stiffness Score (calc)                          |
| 288  | V00WOMTSL  | Num  | 8   | 5.1     |          | EV:Left knee: WOMAC Total Score (calc)                               |
| 289  | V00WOMTSR  | Num  | 8   | 5.1     |          | EV:Right knee: WOMAC Total Score (calc)                              |
| 1183 | V00WORK7   | Num  | 8   | YNDK.   | 3.       | EV:Occupational activities: work (pay/ volunteer), past 7 days       |
| 1184 | V00WORKAMT | Num  | 8   | JOBCAT. | 3.       | EV:Occupational activities: occupational activity level, past 7 days |
| 211  | V00WPLKN1  | Num  | 8   | PAIN1Z. | 3.       | EV:Left knee pain: walking, last 7 days                              |
| 212  | V00WPLKN2  | Num  | 8   | PAIN1Z. | 3.       | EV:Left knee pain: stairs, last 7 days                               |
| 213  | V00WPLKN3  | Num  | 8   | PAIN1Z. | 3.       | EV:Left knee pain: in bed, last 7 days                               |
| 214  | V00WPLKN4  | Num  | 8   | PAIN1Z. | 3.       | EV:Left knee pain: sit or lie down, last 7 days                      |
| 215  | V00WPLKN5  | Num  | 8   | PAIN1Z. | 3.       | EV:Left knee pain: standing, last 7 days                             |
| 178  | V00WPRKN1  | Num  | 8   | PAIN1Z. | 3.       | EV:Right knee pain: walking, last 7 days                             |
| 179  | V00WPRKN2  | Num  | 8   | PAIN1Z. | 3.       | EV:Right knee pain: stairs, last 7 days                              |
| 180  | V00WPRKN3  | Num  | 8   | PAIN1Z. | 3.       | EV:Right knee pain: in bed, last 7 days                              |
| 181  | V00WPRKN4  | Num  | 8   | PAIN1Z. | 3.       | EV:Right knee pain: sit or lie down, last 7 days                     |
| 182  | V00WPRKN5  | Num  | 8   | PAIN1Z. | 3.       | EV:Right knee pain: standing, last 7 days                            |
| 220  | V00WSLKN1  | Num  | 8   | PAIN1Z. | 3.       | EV:Left knee stiffness: in morning, last 7 days                      |
| 221  | V00WSLKN2  | Num  | 8   | PAIN1Z. | 3.       | EV:Left knee stiffness: later in day, last 7 days                    |
| 187  | V00WSRKN1  | Num  | 8   | PAIN1Z. | 3.       | EV:Right knee stiffness: in morning, last 7 days                     |



## The CONTENTS Procedure

## Alphabetic List of Variables and Attributes

| #   | Variable   | Type | Len | Format  | Informat | Label                                                                                                       |
|-----|------------|------|-----|---------|----------|-------------------------------------------------------------------------------------------------------------|
| 188 | V00WSRKN2  | Num  | 8   | PAIN1Z. | 3.       | EV:Right knee stiffness: later in day, last 7 days                                                          |
| 545 | V00WT25KG  | Num  | 8   |         |          | SAQ:Weight at age 25, self-reported (kg) (calc)                                                             |
| 546 | V00WTMAXKG | Num  | 8   |         |          | SAQ:Maximum adult weight, self-reported (kg) (calc)                                                         |
| 547 | V00WTMINKG | Num  | 8   |         |          | SAQ:Minimum adult weight, self-reported (kg) (calc)                                                         |
| 94  | V00XRATLL  | Num  | 8   |         |          | SV:Left knee paired x-ray reading: attrition (OARSI grades 0-3) tibia lateral compartment (Image Sample B)  |
| 65  | V00XRATTLR | Num  | 8   |         |          | SV:Right knee paired x-ray reading: attrition (OARSI grades 0-3) tibia lateral compartment (Image Sample B) |
| 84  | V00XRATML  | Num  | 8   |         |          | SV:Left knee paired x-ray reading: attrition (OARSI grades 0-3) tibia medial compartment (Image Sample B)   |
| 74  | V00XRATTMR | Num  | 8   |         |          | SV:Right knee paired x-ray reading: attrition (OARSI grades 0-3) tibia medial compartment (Image Sample B)  |
| 56  | V00XRBCODE | Char | 12  | \$12.   | \$12.    | SV:Paired x-ray reading: barcode of P01 x-ray (Image Sample B)                                              |
| 90  | V00XRCHLL  | Num  | 8   |         |          | SV:Left knee paired x-ray reading: chondrocalcinosis (Grades 0-1) lateral compartment (Image Sample B)      |
| 61  | V00XRCHLR  | Num  | 8   |         |          | SV:Right knee paired x-ray reading: chondrocalcinosis (Grades 0-1) lateral compartment (Image Sample B)     |
| 80  | V00XRCHML  | Num  | 8   |         |          | SV:Left knee paired x-ray reading: chondrocalcinosis (Grades 0-1) medial compartment (Image Sample B)       |
| 70  | V00XRCHMR  | Num  | 8   |         |          | SV:Right knee paired x-ray reading: chondrocalcinosis (Grades 0-1) medial compartment (Image Sample B)      |
| 88  | V00XRCYFLL | Num  | 8   |         |          | SV:Left knee paired x-ray reading: cysts (Grades 0-1) femur lateral compartment (Image Sample B)            |
| 59  | V00XRCYFLR | Num  | 8   |         |          | SV:Right knee paired x-ray reading: cysts (Grades 0-1) femur lateral compartment (Image Sample B)           |
| 78  | V00XRCYFML | Num  | 8   |         |          | SV:Left knee paired x-ray reading: cysts (Grades 0-1) femur medial compartment (Image Sample B)             |
| 68  | V00XRCYFMR | Num  | 8   |         |          | SV:Right knee paired x-ray reading: cysts (Grades 0-1) femur medial compartment (Image Sample B)            |
| 93  | V00XRCYTLL | Num  | 8   |         |          | SV:Left knee paired x-ray reading: cysts (Grades 0-1) tibia lateral compartment (Image Sample B)            |

## The CONTENTS Procedure

## Alphabetic List of Variables and Attributes

| #  | Variable   | Type | Len | Format | Informat | Label                                                                                                             |
|----|------------|------|-----|--------|----------|-------------------------------------------------------------------------------------------------------------------|
| 64 | V00XRCYTLR | Num  | 8   |        |          | SV:Right knee paired x-ray reading: cysts (Grades 0-1) tibia lateral compartment (Image Sample B)                 |
| 83 | V00XRCYTML | Num  | 8   |        |          | SV:Left knee paired x-ray reading: cysts (Grades 0-1) tibia medial compartment (Image Sample B)                   |
| 73 | V00XRCYTMR | Num  | 8   |        |          | SV:Right knee paired x-ray reading: cysts (Grades 0-1) tibia medial compartment (Image Sample B)                  |
| 89 | V00XRJSLL  | Num  | 8   |        |          | SV:Left knee paired x-ray reading: joint space narrowing (OARSI grades 0-3) lateral compartment (Image Sample B)  |
| 60 | V00XRJSLR  | Num  | 8   |        |          | SV:Right knee paired x-ray reading: joint space narrowing (OARSI grades 0-3) lateral compartment (Image Sample B) |
| 79 | V00XRJSML  | Num  | 8   |        |          | SV:Left knee paired x-ray reading: joint space narrowing (OARSI grades 0-3) medial compartment (Image Sample B)   |
| 69 | V00XRJSMR  | Num  | 8   |        |          | SV:Right knee paired x-ray reading: joint space narrowing (OARSI grades 0-3) medial compartment (Image Sample B)  |
| 85 | V00XRKLL   | Num  | 8   |        |          | SV:Left knee paired x-ray reading: Kellgren and Lawrence (Grades 0-4) (Image Sample B)                            |
| 75 | V00XRKLR   | Num  | 8   |        |          | SV:Right knee paired x-ray reading: Kellgren and Lawrence (Grades 0-4) (Image Sample B)                           |
| 86 | V00XROSFL  | Num  | 8   |        |          | SV:Left knee paired x-ray reading: osteophytes (OARSI grades 0-3) femur lateral compartment (Image Sample B)      |
| 57 | V00XROSFLR | Num  | 8   |        |          | SV:Right knee paired x-ray reading: osteophytes (OARSI grades 0-3) femur lateral compartment (Image Sample B)     |
| 76 | V00XROSFML | Num  | 8   |        |          | SV:Left knee paired x-ray reading: osteophytes (OARSI grades 0-3) femur medial compartment (Image Sample B)       |
| 66 | V00XROSFMR | Num  | 8   |        |          | SV:Right knee paired x-ray reading: osteophytes (OARSI grades 0-3) femur medial compartment (Image Sample B)      |
| 91 | V00XROSTLL | Num  | 8   |        |          | SV:Left knee paired x-ray reading: osteophytes (OARSI grades 0-3) tibia lateral compartment (Image Sample B)      |
| 62 | V00XROSTLR | Num  | 8   |        |          | SV:Right knee paired x-ray reading: osteophytes (OARSI grades 0-3) tibia lateral compartment (Image Sample B)     |
| 81 | V00XROSTML | Num  | 8   |        |          | SV:Left knee paired x-ray reading: osteophytes (OARSI grades 0-3) tibia medial compartment (Image Sample B)       |

## The CONTENTS Procedure

## Alphabetic List of Variables and Attributes

| #    | Variable   | Type | Len | Format   | Informat | Label                                                                                                                                           |
|------|------------|------|-----|----------|----------|-------------------------------------------------------------------------------------------------------------------------------------------------|
| 71   | V00XRSTMR  | Num  | 8   |          |          | SV:Right knee paired x-ray reading: osteophytes (OARSI grades 0-3) tibia medial compartment (Image Sample B)                                    |
| 87   | V00XRSCFLL | Num  | 8   |          |          | SV:Left knee paired x-ray reading: sclerosis (OARSI grades 0-3) femur lateral compartment (Image Sample B)                                      |
| 58   | V00XRSCFLR | Num  | 8   |          |          | SV:Right knee paired x-ray reading: sclerosis (OARSI grades 0-3) femur lateral compartment (Image Sample B)                                     |
| 77   | V00XRSCFML | Num  | 8   |          |          | SV:Left knee paired x-ray reading: sclerosis (OARSI grades 0-3) femur medial compartment (Image Sample B)                                       |
| 67   | V00XRSCFMR | Num  | 8   |          |          | SV:Right knee paired x-ray reading: sclerosis (OARSI grades 0-3) femur medial compartment (Image Sample B)                                      |
| 92   | V00XRSCTLL | Num  | 8   |          |          | SV:Left knee paired x-ray reading: sclerosis (OARSI grades 0-3) tibia lateral compartment (Image Sample B)                                      |
| 63   | V00XRSCTLR | Num  | 8   |          |          | SV:Right knee paired x-ray reading: sclerosis (OARSI grades 0-3) tibia lateral compartment (Image Sample B)                                     |
| 82   | V00XRSCTML | Num  | 8   |          |          | SV:Left knee paired x-ray reading: sclerosis (OARSI grades 0-3) tibia medial compartment (Image Sample B)                                       |
| 72   | V00XRSCTMR | Num  | 8   |          |          | SV:Right knee paired x-ray reading: sclerosis (OARSI grades 0-3) tibia medial compartment (Image Sample B)                                      |
| 523  | V00YOGA12  | Num  | 8   | YNDK.    | 3.       | EV:Q65.CAM: do any health or special movement activity, such as Tai Chi, Yoga, Chi Gong or Pilates, for arthritis or joint pain, past 12 months |
| 574  | V00YOGACV  | Num  | 8   | YNDK.    |          | EV:Q65a.CAM: currently do any type of health or special movement activity for arthritis or joint pain (calc)                                    |
| 799  | V00ZINCCV  | Num  | 8   | FFQ16X.  |          | SAQ:Block Brief 2000: Zinc alone, how often past 12 months (calc)                                                                               |
| 1075 | V00isexmdt | Num  | 8   | MMDDYY8. | DATE9.   | ExamDate                                                                                                                                        |
| 1074 | V00isstfid | Char | 4   | \$4.     | \$4.     | Isometric Strength Staff ID #                                                                                                                   |
| 1122 | V00leSFP   | Num  | 8   |          |          | Left Extension Speed of Force Production                                                                                                        |
| 1116 | V00leSFR   | Num  | 8   |          |          | Left Extension Speed of Force Relaxation                                                                                                        |
| 1097 | V00leTHPL  | Num  | 8   |          |          | Left Extension MAX Force High Production Limit                                                                                                  |
| 1099 | V00leTHRL  | Num  | 8   |          |          | Left Extension MAX Force High Relaxation Limit                                                                                                  |
| 1096 | V00leTLPL  | Num  | 8   |          |          | Left Extension MAX Force Low Production Limit                                                                                                   |

## The CONTENTS Procedure

## Alphabetic List of Variables and Attributes

| #    | Variable   | Type | Len | Format  | Informat | Label                                               |
|------|------------|------|-----|---------|----------|-----------------------------------------------------|
| 1098 | V00leTLRL  | Num  | 8   |         |          | Left Extension MAX Force Low Relaxation Limit       |
| 1095 | V00lemaxf  | Num  | 8   | SPECF.  |          | Left Extension MAX Force                            |
| 1094 | V00letrial | Num  | 8   | SPECF.  |          | Left Extension MAX Force TRIAL No                   |
| 1107 | V00lexcmp2 | Num  | 8   | YNDK.   |          | Left Extension Completed >=2 Good Trials            |
| 1117 | V00lfSFP   | Num  | 8   |         |          | Left Flexion Speed of Force Production              |
| 1120 | V00lfSFR   | Num  | 8   |         |          | Left Flexion Speed of Force Relaxation              |
| 1091 | V00lfTHPL  | Num  | 8   |         |          | Left Flexion MAX Force High Production Limit        |
| 1093 | V00lfTHRL  | Num  | 8   |         |          | Left Flexion MAX Force High Relaxation Limit        |
| 1090 | V00lfTLPL  | Num  | 8   |         |          | Left Flexion MAX Force Low Production Limit         |
| 1092 | V00lfTLRL  | Num  | 8   |         |          | Left Flexion MAX Force Low Relaxation Limit         |
| 1089 | V00lfmaxf  | Num  | 8   | SPECF.  |          | Left Flexion MAX Force                              |
| 1088 | V00lftrial | Num  | 8   | SPECF.  |          | Left Flexion MAX Force TRIAL No                     |
| 1109 | V00lfxcmp2 | Num  | 8   | YNDK.   |          | Left Flexion Completed >=2 Good Trials              |
| 1111 | V00lkdefcv | Num  | 8   | VARVAL. |          | EV:Left knee exam: alignment varus or valgus (calc) |
| 1118 | V00reSFP   | Num  | 8   |         |          | Right Extension Speed of Force Production           |
| 1119 | V00reSFR   | Num  | 8   |         |          | Right Extension Speed of Force Relaxation           |
| 1085 | V00reTHPL  | Num  | 8   |         |          | Right Extension MAX Force High Production Limit     |
| 1087 | V00reTHRL  | Num  | 8   |         |          | Right Extension MAX Force High Relaxation Limit     |
| 1084 | V00reTLPL  | Num  | 8   |         |          | Right Extension MAX Force Low Production Limit      |
| 1086 | V00reTLRL  | Num  | 8   |         |          | Right Extension MAX Force Low Relaxation Limit      |
| 1083 | V00remaxf  | Num  | 8   | SPECF.  |          | Right Extension MAX Force                           |
| 1082 | V00retrial | Num  | 8   | SPECF.  |          | Right Extension MAX Force TRIAL No                  |
| 1106 | V00rexcmp2 | Num  | 8   | YNDK.   |          | Right Extension Completed >=2 Good Trials           |
| 1121 | V00rfSFP   | Num  | 8   |         |          | Right Flexion Speed of Force Production             |
| 1115 | V00rfSFR   | Num  | 8   |         |          | Right Flexion Speed of Force Relaxation             |
| 1079 | V00rfTHPL  | Num  | 8   |         |          | Right Flexion MAX Force High Production Limit       |
| 1081 | V00rfTHRL  | Num  | 8   |         |          | Right Flexion MAX Force High Relaxation Limit       |
| 1078 | V00rfTLPL  | Num  | 8   |         |          | Right Flexion MAX Force Low Production Limit        |
| 1080 | V00rfTLRL  | Num  | 8   |         |          | Right Flexion MAX Force Low Relaxation Limit        |
| 1077 | V00rfmaxf  | Num  | 8   | SPECF.  |          | Right Flexion MAX Force                             |
| 1076 | V00rftrial | Num  | 8   | SPECF.  |          | Right Flexion MAX Force TRIAL No                    |
| 1108 | V00rfxcmp2 | Num  | 8   | YNDK.   |          | Right Flexion Completed >=2 Good Trials             |

**The CONTENTS Procedure**

---

Alphabetic List of Variables and Attributes

| #    | Variable   | Type | Len | Format  | Informat | Label                                                |
|------|------------|------|-----|---------|----------|------------------------------------------------------|
| 1112 | V00rkdefcv | Num  | 8   | VARVAL. |          | EV:Right knee exam: alignment varus or valgus (calc) |
| 2    | VERSION    | Char | 5   |         |          | Release Version                                      |

---

## The CONTENTS Procedure

| Variables in Creation Order |            |      |     |        |          |                                                                                                                    |
|-----------------------------|------------|------|-----|--------|----------|--------------------------------------------------------------------------------------------------------------------|
| #                           | Variable   | Type | Len | Format | Informat | Label                                                                                                              |
| 1                           | ID         | Char | 7   | \$7.   | \$7.     | ReleaseID                                                                                                          |
| 2                           | VERSION    | Char | 5   |        |          | Release Version                                                                                                    |
| 3                           | P01RXRKOA  | Num  | 8   | YNDK.  |          | SV:Right knee baseline radiographic OA (definite osteophytes, calc, used in OAI definition of symptomatic knee OA) |
| 4                           | P01LXRKOA  | Num  | 8   | YNDK.  |          | SV:Left knee baseline radiographic OA (definite osteophytes, calc, used in OAI definition of symptomatic knee OA)  |
| 5                           | V00URINHR1 | Num  | 8   |        |          | EV:Urine collection: time collected (first collection, 24- hr time) (calc)                                         |
| 6                           | V00URINHR2 | Num  | 8   |        |          | EV:Urine collection: time collected (repeat collection, 24- hr time) (calc)                                        |
| 7                           | V00BLDHRS1 | Num  | 8   |        |          | EV:Phlebotomy: time venipuncture completed (first draw, 24- hr time) (calc)                                        |
| 8                           | V00BLDHRS2 | Num  | 8   |        |          | EV:Phlebotomy: time venipuncture completed (repeat draw, 24- hr time) (calc)                                       |
| 9                           | V00SEAQHR1 | Num  | 8   |        |          | EV:Laboratory processing: time at start of serum aliquoting (first draw, 24- hour time) (calc)                     |
| 10                          | V00SEAQHR2 | Num  | 8   |        |          | EV:Laboratory processing: time at start of serum aliquoting (repeat draw, 24- hour time) (calc)                    |
| 11                          | V00PLAQHR1 | Num  | 8   |        |          | EV:Laboratory processing: time at start of plasma aliquoting (first draw, 24- hr time) (calc)                      |
| 12                          | V00PLAQHR2 | Num  | 8   |        |          | EV:Laboratory processing: time at start of plasma aliquoting (repeat draw, 24- hour time) (calc)                   |
| 13                          | V00URINOB1 | Num  | 8   | YNDK.  |          | EV:Urine collection: specimen obtained (first collection) (calc)                                                   |
| 14                          | V00URINOB2 | Num  | 8   | YNDK.  |          | EV:Urine collection: specimen obtained (repeat collection) (calc)                                                  |
| 15                          | V00VOID1   | Num  | 8   | VOID.  |          | EV:Urine collection: which void(s) collected (first collection) (calc)                                             |
| 16                          | V00VOID2   | Num  | 8   | VOID.  |          | EV:Urine collection: which void(s) collected (repeat collection) (calc)                                            |
| 17                          | V00ILLPWK1 | Num  | 8   | YNDK.  |          | EV:Phlebotomy: had illness in past week requiring antibiotics, hospitalization or steroids (first draw) (calc)     |
| 18                          | V00ILLPWK2 | Num  | 8   | YNDK.  |          | EV:Phlebotomy: had illness in past week requiring antibiotics, hospitalization or steroids (repeat draw) (calc)    |
| 19                          | V00HOURSP1 | Num  | 8   |        |          | EV:Phlebotomy: how many hours passed since last ate any food before blood draw (first draw) (calc)                 |
| 20                          | V00HOURSP2 | Num  | 8   |        |          | EV:Phlebotomy: how many hours passed since last ate any food before blood draw (repeat draw) (calc)                |

## The CONTENTS Procedure

| Variables in Creation Order |            |      |     |        |          |                                                                                          |
|-----------------------------|------------|------|-----|--------|----------|------------------------------------------------------------------------------------------|
| #                           | Variable   | Type | Len | Format | Informat | Label                                                                                    |
| 21                          | V00QOVP1   | Num  | 8   | LAB2X. |          | EV:Phlebotomy: quality of venipuncture (first draw) (calc)                               |
| 22                          | V00QOVP2   | Num  | 8   | LAB2X. |          | EV:Phlebotomy: quality of venipuncture (repeat draw) (calc)                              |
| 23                          | V00VCOLL1  | Num  | 8   | YNDK.  |          | EV:Phlebotomy: traumatic venipuncture, vein collapse (first draw) (calc)                 |
| 24                          | V00VCOLL2  | Num  | 8   | YNDK.  |          | EV:Phlebotomy: traumatic venipuncture, vein collapse (repeat draw) (calc)                |
| 25                          | V00HEMAT1  | Num  | 8   | YNDK.  |          | EV:Phlebotomy: traumatic venipuncture, hematoma (first draw) (calc)                      |
| 26                          | V00HEMAT2  | Num  | 8   | YNDK.  |          | EV:Phlebotomy: traumatic venipuncture, hematoma (repeat draw) (calc)                     |
| 27                          | V00VEIN1   | Num  | 8   | YNDK.  |          | EV:Phlebotomy: traumatic venipuncture, vein hard to get (first draw) (calc)              |
| 28                          | V00VEIN2   | Num  | 8   | YNDK.  |          | EV:Phlebotomy: traumatic venipuncture, vein hard to get (repeat draw) (calc)             |
| 29                          | V00MULTST1 | Num  | 8   | YNDK.  |          | EV:Phlebotomy: traumatic venipuncture, multiple sticks (first draw) (calc)               |
| 30                          | V00MULTST2 | Num  | 8   | YNDK.  |          | EV:Phlebotomy: traumatic venipuncture, multiple sticks (repeat draw) (calc)              |
| 31                          | V00EXCESS1 | Num  | 8   | YNDK.  |          | EV:Phlebotomy: traumatic venipuncture, excessive duration of draw (first draw) (calc)    |
| 32                          | V00EXCESS2 | Num  | 8   | YNDK.  |          | EV:Phlebotomy: traumatic venipuncture, excessive duration of draw (repeat draw) (calc)   |
| 33                          | V00LEAKAG1 | Num  | 8   | YNDK.  |          | EV:Phlebotomy: traumatic venipuncture, leakage at venipuncture site (first draw) (calc)  |
| 34                          | V00LEAKAG2 | Num  | 8   | YNDK.  |          | EV:Phlebotomy: traumatic venipuncture, leakage at venipuncture site (repeat draw) (calc) |
| 35                          | V00OTHVP1  | Num  | 8   | YNDK.  |          | EV:Phlebotomy: traumatic venipuncture, other (first draw) (calc)                         |
| 36                          | V00OTHVP2  | Num  | 8   | YNDK.  |          | EV:Phlebotomy: traumatic venipuncture, other (repeat draw) (calc)                        |
| 37                          | V00BLDRAW1 | Num  | 8   | YNDK.  |          | EV:Phlebotomy: any blood drawn (first draw) (calc)                                       |
| 38                          | V00BLDRAW2 | Num  | 8   | YNDK.  |          | EV:Phlebotomy: any blood drawn (repeat draw) (calc)                                      |
| 39                          | V00HRSUC1  | Num  | 8   |        |          | EV:Urine collection: hours since ate food before collection (first collection) (calc)    |
| 40                          | V00HRSUC2  | Num  | 8   |        |          | EV:Urine collection: hours since ate food before collection (repeat collection) (calc)   |
| 41                          | P01SVXRRID | Char | 4   | \$4.   | \$4.     | SV:Baseline knee x-ray: clinical center reader ID # (calc)                               |
| 42                          | P01SVXRRKR | Num  | 8   | YNDK.  | 2.       | SV:Right knee baseline x-ray: evidence of knee replacement (calc)                        |

## The CONTENTS Procedure

| Variables in Creation Order |             |      |     |          |          |                                                                                                                     |
|-----------------------------|-------------|------|-----|----------|----------|---------------------------------------------------------------------------------------------------------------------|
| #                           | Variable    | Type | Len | Format   | Informat | Label                                                                                                               |
| 43                          | P01SVXRLKR  | Num  | 8   | YNDK.    | 2.       | SV:Left knee baseline x- ray: evidence of knee replacement (calc)                                                   |
| 44                          | P01SVRKOST  | Num  | 8   | XRAY3Z.  | 2.       | SV:Right knee baseline x- ray: evidence of knee osteophytes (calc)                                                  |
| 45                          | P01SVLKOST  | Num  | 8   | XRAY3Z.  | 2.       | SV:Left knee baseline x- ray: evidence of knee osteophytes (calc)                                                   |
| 46                          | P01SVRKJSM  | Num  | 8   | X_RAY4Z. | 2.       | SV:Right knee baseline x- ray: evidence of knee medial joint space narrowing (calc)                                 |
| 47                          | P01SVLKJSM  | Num  | 8   | X_RAY4Z. | 2.       | SV:Left knee baseline x- ray: evidence of knee medial joint space narrowing (calc)                                  |
| 48                          | P01SVRKJSL  | Num  | 8   | X_RAY4Z. | 2.       | SV:Right knee baseline x- ray: evidence of knee lateral joint space narrowing (calc)                                |
| 49                          | P01SVLKJSL  | Num  | 8   | X_RAY4Z. | 2.       | SV:Left knee baseline x- ray: evidence of knee lateral joint space narrowing (calc)                                 |
| 50                          | P01SVRKMI   | Num  | 8   | YNDK.    | 2.       | SV:Right knee baseline x- ray: evidence of knee metal artifacts (calc)                                              |
| 51                          | P01SVLKMI   | Num  | 8   | YNDK.    | 2.       | SV:Left knee baseline x- ray: evidence of knee metal artifacts (calc)                                               |
| 52                          | P01SVXRELK  | Num  | 8   | LRB.     | 2.       | SV:Baseline knee x- ray: knee(s) eligible for MRI based on x- ray (calc)                                            |
| 53                          | P01XRKOA    | Num  | 8   | KNEESF.  |          | SV:Baseline radiographic knee OA status by person (calc)                                                            |
| 54                          | P01RXRKOAA2 | Num  | 8   | XRKOA.   |          | SV:Right knee baseline x- ray: osteophytes and JSN (calc)                                                           |
| 55                          | P01LXRKOAA2 | Num  | 8   | XRKOA.   |          | SV:Left knee baseline x- ray: osteophytes and JSN (calc)                                                            |
| 56                          | V00XRBCODE  | Char | 12  | \$12.    | \$12.    | SV:Paired x- ray reading: barcode of P01 x- ray (Image Sample B)                                                    |
| 57                          | V00XROSFLR  | Num  | 8   |          |          | SV:Right knee paired x- ray reading: osteophytes (OARSI grades 0- 3) femur lateral compartment (Image Sample B)     |
| 58                          | V00XRSCFLR  | Num  | 8   |          |          | SV:Right knee paired x- ray reading: sclerosis (OARSI grades 0- 3) femur lateral compartment (Image Sample B)       |
| 59                          | V00XRCYFLR  | Num  | 8   |          |          | SV:Right knee paired x- ray reading: cysts (Grades 0- 1) femur lateral compartment (Image Sample B)                 |
| 60                          | V00XRJSLR   | Num  | 8   |          |          | SV:Right knee paired x- ray reading: joint space narrowing (OARSI grades 0- 3) lateral compartment (Image Sample B) |
| 61                          | V00XRCHLR   | Num  | 8   |          |          | SV:Right knee paired x- ray reading: chondrocalcinosis (Grades 0- 1) lateral compartment (Image Sample B)           |



## The CONTENTS Procedure

| Variables in Creation Order |            |      |     |        |          |                                                                                                                  |
|-----------------------------|------------|------|-----|--------|----------|------------------------------------------------------------------------------------------------------------------|
| #                           | Variable   | Type | Len | Format | Informat | Label                                                                                                            |
| 62                          | V00XROSTLR | Num  | 8   |        |          | SV:Right knee paired x-ray reading: osteophytes (OARSI grades 0-3) tibia lateral compartment (Image Sample B)    |
| 63                          | V00XRSTLR  | Num  | 8   |        |          | SV:Right knee paired x-ray reading: sclerosis (OARSI grades 0-3) tibia lateral compartment (Image Sample B)      |
| 64                          | V00XRCYTLR | Num  | 8   |        |          | SV:Right knee paired x-ray reading: cysts (Grades 0-1) tibia lateral compartment (Image Sample B)                |
| 65                          | V00XRATTLR | Num  | 8   |        |          | SV:Right knee paired x-ray reading: attrition (OARSI grades 0-3) tibia lateral compartment (Image Sample B)      |
| 66                          | V00XROSFMR | Num  | 8   |        |          | SV:Right knee paired x-ray reading: osteophytes (OARSI grades 0-3) femur medial compartment (Image Sample B)     |
| 67                          | V00XRSCFMR | Num  | 8   |        |          | SV:Right knee paired x-ray reading: sclerosis (OARSI grades 0-3) femur medial compartment (Image Sample B)       |
| 68                          | V00XRCYFMR | Num  | 8   |        |          | SV:Right knee paired x-ray reading: cysts (Grades 0-1) femur medial compartment (Image Sample B)                 |
| 69                          | V00XRJSMR  | Num  | 8   |        |          | SV:Right knee paired x-ray reading: joint space narrowing (OARSI grades 0-3) medial compartment (Image Sample B) |
| 70                          | V00XRCHMR  | Num  | 8   |        |          | SV:Right knee paired x-ray reading: chondrocalcinosis (Grades 0-1) medial compartment (Image Sample B)           |
| 71                          | V00XROSTMR | Num  | 8   |        |          | SV:Right knee paired x-ray reading: osteophytes (OARSI grades 0-3) tibia medial compartment (Image Sample B)     |
| 72                          | V00XRSTMR  | Num  | 8   |        |          | SV:Right knee paired x-ray reading: sclerosis (OARSI grades 0-3) tibia medial compartment (Image Sample B)       |
| 73                          | V00XRCYTMR | Num  | 8   |        |          | SV:Right knee paired x-ray reading: cysts (Grades 0-1) tibia medial compartment (Image Sample B)                 |
| 74                          | V00XRATTMR | Num  | 8   |        |          | SV:Right knee paired x-ray reading: attrition (OARSI grades 0-3) tibia medial compartment (Image Sample B)       |
| 75                          | V00XRKLR   | Num  | 8   |        |          | SV:Right knee paired x-ray reading: Kellgren and Lawrence (Grades 0-4) (Image Sample B)                          |
| 76                          | V00XROSFML | Num  | 8   |        |          | SV:Left knee paired x-ray reading: osteophytes (OARSI grades 0-3) femur medial compartment (Image Sample B)      |
| 77                          | V00XRSCFML | Num  | 8   |        |          | SV:Left knee paired x-ray reading: sclerosis (OARSI grades 0-3) femur medial compartment (Image Sample B)        |
| 78                          | V00XRCYFML | Num  | 8   |        |          | SV:Left knee paired x-ray reading: cysts (Grades 0-1) femur medial compartment (Image Sample B)                  |

## The CONTENTS Procedure

| Variables in Creation Order |            |      |     |         |          |                                                                                                                  |
|-----------------------------|------------|------|-----|---------|----------|------------------------------------------------------------------------------------------------------------------|
| #                           | Variable   | Type | Len | Format  | Informat | Label                                                                                                            |
| 79                          | V00XRJSML  | Num  | 8   |         |          | SV:Left knee paired x-ray reading: joint space narrowing (OARSI grades 0-3) medial compartment (Image Sample B)  |
| 80                          | V00XRCHML  | Num  | 8   |         |          | SV:Left knee paired x-ray reading: chondrocalcinosis (Grades 0-1) medial compartment (Image Sample B)            |
| 81                          | V00XROSTML | Num  | 8   |         |          | SV:Left knee paired x-ray reading: osteophytes (OARSI grades 0-3) tibia medial compartment (Image Sample B)      |
| 82                          | V00XRSCML  | Num  | 8   |         |          | SV:Left knee paired x-ray reading: sclerosis (OARSI grades 0-3) tibia medial compartment (Image Sample B)        |
| 83                          | V00XRCYTML | Num  | 8   |         |          | SV:Left knee paired x-ray reading: cysts (Grades 0-1) tibia medial compartment (Image Sample B)                  |
| 84                          | V00XRATTML | Num  | 8   |         |          | SV:Left knee paired x-ray reading: attrition (OARSI grades 0-3) tibia medial compartment (Image Sample B)        |
| 85                          | V00XRKLL   | Num  | 8   |         |          | SV:Left knee paired x-ray reading: Kellgren and Lawrence (Grades 0-4) (Image Sample B)                           |
| 86                          | V00XROSFLL | Num  | 8   |         |          | SV:Left knee paired x-ray reading: osteophytes (OARSI grades 0-3) femur lateral compartment (Image Sample B)     |
| 87                          | V00XRSCFLL | Num  | 8   |         |          | SV:Left knee paired x-ray reading: sclerosis (OARSI grades 0-3) femur lateral compartment (Image Sample B)       |
| 88                          | V00XRCYFLL | Num  | 8   |         |          | SV:Left knee paired x-ray reading: cysts (Grades 0-1) femur lateral compartment (Image Sample B)                 |
| 89                          | V00XRJSLL  | Num  | 8   |         |          | SV:Left knee paired x-ray reading: joint space narrowing (OARSI grades 0-3) lateral compartment (Image Sample B) |
| 90                          | V00XRCHLL  | Num  | 8   |         |          | SV:Left knee paired x-ray reading: chondrocalcinosis (Grades 0-1) lateral compartment (Image Sample B)           |
| 91                          | V00XROSTLL | Num  | 8   |         |          | SV:Left knee paired x-ray reading: osteophytes (OARSI grades 0-3) tibia lateral compartment (Image Sample B)     |
| 92                          | V00XRSCLL  | Num  | 8   |         |          | SV:Left knee paired x-ray reading: sclerosis (OARSI grades 0-3) tibia lateral compartment (Image Sample B)       |
| 93                          | V00XRCYTLL | Num  | 8   |         |          | SV:Left knee paired x-ray reading: cysts (Grades 0-1) tibia lateral compartment (Image Sample B)                 |
| 94                          | V00XRATLL  | Num  | 8   |         |          | SV:Left knee paired x-ray reading: attrition (OARSI grades 0-3) tibia lateral compartment (Image Sample B)       |
| 95                          | P01OAGRDR  | Num  | 8   | COMPOA. |          | SV:Right knee baseline x-ray: composite OA grade (quasi KL grade) (calc)                                         |

## The CONTENTS Procedure

| Variables in Creation Order |            |      |     |         |          |                                                                                                                      |
|-----------------------------|------------|------|-----|---------|----------|----------------------------------------------------------------------------------------------------------------------|
| #                           | Variable   | Type | Len | Format  | Informat | Label                                                                                                                |
| 96                          | V00BLDCOLL | Num  | 8   | BSCOLL. |          | EV:Phlebotomy: which draw(s) blood obtained at (calc)                                                                |
| 97                          | V00UCDATE2 | Num  | 8   |         |          | EV:Urine collection: date of sample collection (repeat collection) (calc)                                            |
| 98                          | V00URNCOLL | Num  | 8   | BSCOLL. |          | EV:Urine collection: which sample collection(s) specimen obtained at (calc)                                          |
| 99                          | V00PDATE2  | Num  | 8   |         |          | EV:Phlebotomy: date of blood draw (repeat draw) (calc)                                                               |
| 100                         | V00PDATE1  | Num  | 8   |         |          | EV:Phlebotomy: date of blood draw (first draw) (calc)                                                                |
| 101                         | V00UCDATE1 | Num  | 8   |         |          | EV:Urine collection: date of sample collection (first collection) (calc)                                             |
| 102                         | P01OAGRDL  | Num  | 8   | COMPOA. |          | SV:Left knee baseline x-ray: composite OA grade (quasi KL grade) (calc)                                              |
| 103                         | V00BLSURD2 | Num  | 8   |         |          | EV:Phlebotomy: days between most recent surgery and blood draw (repeat draw) (calc)                                  |
| 104                         | V00URSURD2 | Num  | 8   |         |          | EV:Urine collection: days between most recent surgery and collection (repeat collection) (calc)                      |
| 105                         | V00BLSURD1 | Num  | 8   |         |          | EV:Phlebotomy: days between most recent surgery and blood draw (first draw) (calc)                                   |
| 106                         | V00URSURD1 | Num  | 8   |         |          | EV:Urine collection: days between most recent surgery and collection (first collection) (calc)                       |
| 107                         | V00MRSEQNR | Num  | 8   | LADDER. |          | EV MRI:Right knee, number of unique OAI standard MRI sequences obtained (calc)                                       |
| 108                         | V00MRSEQNL | Num  | 8   | LADDER. |          | EV MRI:Left knee, number of unique OAI standard MRI sequences obtained (calc)                                        |
| 109                         | V00SERUM   | Num  | 8   | BSCOLL. |          | EV:Phlebotomy: which draw(s) serum obtained at (calc)                                                                |
| 110                         | V00EDTA    | Num  | 8   | BSCOLL. |          | EV:Phlebotomy: which draw(s) EDTA obtained at (calc)                                                                 |
| 111                         | V00CITRATE | Num  | 8   | BSCOLL. |          | EV:Phlebotomy: which draw(s) citrate obtained at (calc)                                                              |
| 112                         | P02KPN     | Num  | 8   | YNDK.   | 3.       | IEI:Q9.Either knee pain, aching or stiffness: any, past 12 months (used for study eligibility)                       |
| 113                         | P01KPNREV  | Num  | 8   | YNDK.   | 3.       | SV:Q14.Right knee pain, aching or stiffness: ever had more than half the days of a month                             |
| 114                         | P01KPNREVY | Num  | 8   | YEAR3Z. | 3.       | SV:Q14a.Right knee pain, aching or stiffness: started about how many years ago                                       |
| 115                         | P01KPNR12  | Num  | 8   | YNDK.   | 3.       | SV:Q15.Right knee pain, aching or stiffness: any, past 12 months                                                     |
| 116                         | P01KPNR12M | Num  | 8   | 3.      | 3.       | SV:Q15ai.Right knee pain, aching or stiffness: how many months on more than half the days of a month, past 12 months |
| 117                         | P01KPNLEV  | Num  | 8   | YNDK.   | 3.       | SV:Q17.Left knee pain, aching or stiffness: ever had more than half the days of a month                              |

## The CONTENTS Procedure

| Variables in Creation Order |            |      |     |          |          |                                                                                                                                |
|-----------------------------|------------|------|-----|----------|----------|--------------------------------------------------------------------------------------------------------------------------------|
| #                           | Variable   | Type | Len | Format   | Informat | Label                                                                                                                          |
| 118                         | P01KPNLEVY | Num  | 8   | YEAR3Z.  | 3.       | SV:Q17a.Left knee pain, aching or stiffness: started about how many years ago                                                  |
| 119                         | P01KPNL12  | Num  | 8   | YNDK.    | 3.       | SV:Q18.Left knee pain, aching or stiffness: any, past 12 months                                                                |
| 120                         | P01KPNL12M | Num  | 8   | 3.       | 3.       | SV:Q18ai.Left knee pain, aching or stiffness: how many months on more than half the days of a month, past 12 months            |
| 121                         | P01KPACT30 | Num  | 8   | YNDK.    | 3.       | SV:Q20.Either knee, limit activities due to pain, aching or stiffness, past 30 days                                            |
| 122                         | P01HPNR12  | Num  | 8   | YNDK.    | 3.       | SV:Q38.Right hip pain, aching or stiffness: any, past 12 months (includes pain in groin and in front and sides of upper thigh) |
| 123                         | P01HPNRIL  | Num  | 8   | HIPPAIN. | 2.       | SV:Q38ai.Right hip pain, aching or stiffness location: groin/ inside leg near hip                                              |
| 124                         | P01HPNROL  | Num  | 8   | HIPPAIN. | 2.       | SV:Q38ai.Right hip pain, aching or stiffness location: outside of leg near hip                                                 |
| 125                         | P01HPNRFL  | Num  | 8   | HIPPAIN. | 2.       | SV:Q38ai.Right hip pain, aching or stiffness location: front of leg near hip                                                   |
| 126                         | P01HPNRB   | Num  | 8   | HIPPAIN. | 2.       | SV:Q38ai.Right hip pain, aching or stiffness location: buttocks                                                                |
| 127                         | P01HPNRLB  | Num  | 8   | HIPPAIN. | 2.       | SV:Q38ai.Right hip pain, aching or stiffness location: lower back                                                              |
| 128                         | P01HPNRDK  | Num  | 8   | HIPPAIN. | 3.       | SV:Q38ai.Right hip pain, aching or stiffness location: don't know                                                              |
| 129                         | P01HPNL12  | Num  | 8   | YNDK.    | 3.       | SV:Q39.Left hip pain, aching or stiffness: any, past 12 months (includes pain in groin and in front and sides of upper thigh)  |
| 130                         | P01HPNLIL  | Num  | 8   | HIPPAIN. | 2.       | SV:Q39ai.Left hip pain, aching or stiffness location: groin/ inside leg near hip                                               |
| 131                         | P01HPNLOL  | Num  | 8   | HIPPAIN. | 2.       | SV:Q39ai.Left hip pain, aching or stiffness location: outside of leg near hip                                                  |
| 132                         | P01HPNLFL  | Num  | 8   | HIPPAIN. | 2.       | SV:Q39ai.Left hip pain, aching or stiffness location: front of leg near hip                                                    |
| 133                         | P01HPNLB   | Num  | 8   | HIPPAIN. | 2.       | SV:Q39ai.Left hip pain, aching or stiffness location: buttocks                                                                 |
| 134                         | P01HPNLLB  | Num  | 8   | HIPPAIN. | 2.       | SV:Q39ai.Left hip pain, aching or stiffness location: lower back                                                               |
| 135                         | P01HPNLDK  | Num  | 8   | HIPPAIN. | 3.       | SV:Q39ai.Left hip pain, aching or stiffness location: don't know                                                               |
| 136                         | P01BP30    | Num  | 8   | YNDK.    | 3.       | SV:Q43.Any back pain, past 30 days                                                                                             |
| 137                         | P01BP30OFT | Num  | 8   | BACK.    | 3.       | SV:Q43a.How often bothered by back pain, past 30 days                                                                          |

## The CONTENTS Procedure

| Variables in Creation Order |            |      |     |        |          |                                                                                                               |
|-----------------------------|------------|------|-----|--------|----------|---------------------------------------------------------------------------------------------------------------|
| #                           | Variable   | Type | Len | Format | Informat | Label                                                                                                         |
| 138                         | P01BPBAD   | Num  | 8   | CYBEX. | 3.       | SV:Q43b.When had back pain how bad was it on average, past 30 days                                            |
| 139                         | P01BPUB    | Num  | 8   | YNDK.  | 2.       | SV:Q43c.Back pain location, upper back                                                                        |
| 140                         | P01BPMB    | Num  | 8   | YNDK.  | 2.       | SV:Q43c.Back pain location, middle back                                                                       |
| 141                         | P01BPLB    | Num  | 8   | YNDK.  | 2.       | SV:Q43c.Back pain location, lower back                                                                        |
| 142                         | P01BPB     | Num  | 8   | YNDK.  | 2.       | SV:Q43c.Back pain location, buttocks                                                                          |
| 143                         | P01BPDK    | Num  | 8   | YNDK.  | 3.       | SV:Q43c.Back pain location, don't know                                                                        |
| 144                         | P01OJPNRS  | Num  | 8   | YNDK.  | 3.       | SV:Q44.Right shoulder pain, aching or stiffness: more than half the days, past 30 days                        |
| 145                         | P01OJPNLS  | Num  | 8   | YNDK.  | 3.       | SV:Q44.Left shoulder pain, aching or stiffness: more than half the days, past 30 days                         |
| 146                         | P01OJPNRE  | Num  | 8   | YNDK.  | 2.       | SV:Q44.Right elbow pain, aching or stiffness: more than half the days, past 30 days                           |
| 147                         | P01OJPNLE  | Num  | 8   | YNDK.  | 2.       | SV:Q44.Left elbow pain, aching or stiffness: more than half the days, past 30 days                            |
| 148                         | P01OJPNRW  | Num  | 8   | YNDK.  | 2.       | SV:Q44.Right wrist pain, aching or stiffness: more than half the days, past 30 days                           |
| 149                         | P01OJPNLW  | Num  | 8   | YNDK.  | 2.       | SV:Q44.Left wrist pain, aching or stiffness: more than half the days, past 30 days                            |
| 150                         | P01OJPNRH  | Num  | 8   | YNDK.  | 2.       | SV:Q44.Right hand/ finger pain, aching or stiffness: more than half the days, past 30 days                    |
| 151                         | P01OJPNLH  | Num  | 8   | YNDK.  | 2.       | SV:Q44.Left hand/ finger pain, aching or stiffness: more than half the days, past 30 days                     |
| 152                         | P01OJPNRA  | Num  | 8   | YNDK.  | 3.       | SV:Q44.Right ankle pain, aching or stiffness: more than half the days, past 30 days                           |
| 153                         | P01OJPNLA  | Num  | 8   | YNDK.  | 2.       | SV:Q44.Left ankle pain, aching or stiffness: more than half the days, past 30 days                            |
| 154                         | P01OJPNRF  | Num  | 8   | YNDK.  | 2.       | SV:Q44.Right foot pain, aching or stiffness: more than half the days, past 30 days                            |
| 155                         | P01OJPNLF  | Num  | 8   | YNDK.  | 2.       | SV:Q44.Left foot pain, aching or stiffness: more than half the days, past 30 days                             |
| 156                         | P01OJPNNK  | Num  | 8   | YNDK.  | 2.       | SV:Q44.Neck pain, aching or stiffness: more than half the days, past 30 days                                  |
| 157                         | P01OJPNNO  | Num  | 8   | YNDK.  | 3.       | SV:Q44.Other joints pain, aching or stiffness: more than half the days, past 30 days, no, don't know, refused |
| 158                         | P01TMJE6M  | Num  | 8   | YNDK.  | 3.       | SV:Q45.TMJ: jaw joint or in front of ear, experienced pain or aching, past 6 months                           |
| 159                         | P01TMJEPN1 | Num  | 8   | YNDK.  | 3.       | SV:Q45a.TMJ: jaw joint or in front of ear, first have pain or aching more than 6 months ago                   |

## The CONTENTS Procedure

## Variables in Creation Order

| #   | Variable   | Type | Len | Format   | Informat | Label                                                                                                                                             |
|-----|------------|------|-----|----------|----------|---------------------------------------------------------------------------------------------------------------------------------------------------|
| 160 | P01TMJE30D | Num  | 8   | 3.       | 3.       | SV:Q45bi.TMJ: jaw joint or in front of ear, how many days had pain or aching, past 30 days                                                        |
| 161 | P01TMJE30A | Num  | 8   | 3.       | 3.       | SV:Q45biii.TMJ: jaw joint or in front of ear, how many days pain or aching keep from doing usual activities (e.g., work, school...), past 30 days |
| 162 | P01TMJF6M  | Num  | 8   | YNDK.    | 3.       | SV:Q46.TMJ: across face or cheek, experienced pain or aching, past 6 months                                                                       |
| 163 | P01TMJFPN1 | Num  | 8   | YNDK.    | 3.       | SV:Q46a.TMJ: across face or cheek, first have pain or aching more than 6 months ago                                                               |
| 164 | P01TMJF30D | Num  | 8   | 3.       | 3.       | SV:Q46bi.TMJ: across face or cheek, how many days had pain or aching, past 30 days                                                                |
| 165 | P01TMJF30A | Num  | 8   | 3.       | 3.       | SV:Q46biii.TMJ: across face or cheek, how many days pain or aching keep from doing usual activities (e.g., work, school...), past 30 days         |
| 166 | V00SF1     | Num  | 8   | STAT.    | 3.       | SAQ:Q10.SF- 12: in general, how is health                                                                                                         |
| 167 | V00SF2     | Num  | 8   | ACTIV3X. | 3.       | SAQ:Q11a.SF- 12: how much health limit involvement in moderate activities (e.g., moving a table, pushing vacuum cleaner)..                        |
| 168 | V00SF3     | Num  | 8   | ACTIV3X. | 3.       | SAQ:Q11b.SF- 12: how much health limit climbing several flights of stairs                                                                         |
| 169 | V00SF4     | Num  | 8   | TIME6X.  | 3.       | SAQ:Q12a.SF- 12: how often physical health result in accomplishing less than would like with work or other activities, past 4 weeks               |
| 170 | V00SF5     | Num  | 8   | TIME6X.  | 3.       | SAQ:Q12b.SF- 12: how often physical health result in being limited in kind of work or other activities, past 4 weeks                              |
| 171 | V00SF6     | Num  | 8   | TIME6X.  | 3.       | SAQ:Q13a.SF- 12: how often emotional problems result in accomplishing less than would like with work or other activities, past 4 weeks            |
| 172 | V00SF7     | Num  | 8   | TIME6X.  | 3.       | SAQ:Q13b.SF- 12: how often emotional problems result in not doing work or activities as carefully as usual, past 4 weeks                          |
| 173 | V00SF8     | Num  | 8   | RATE9X.  | 3.       | SAQ:Q14.SF- 12: how much did pain interfere with normal work (include work outside home and housework), past 4 weeks                              |
| 174 | V00SF9     | Num  | 8   | TIME6X.  | 3.       | SAQ:Q15a.SF- 12: how often felt calm and peaceful, past 4 weeks                                                                                   |
| 175 | V00SF10    | Num  | 8   | TIME6X.  | 3.       | SAQ:Q15b.SF- 12: how often had a lot of energy, past 4 weeks                                                                                      |
| 176 | V00SF11    | Num  | 8   | TIME6X.  | 3.       | SAQ:Q15c.SF- 12: how often felt downhearted and depressed, past 4 weeks                                                                           |
| 177 | V00SF12    | Num  | 8   | TIME6X.  | 3.       | SAQ:Q16.SF- 12: how often physical health or emotional problems interfered with social activities (like visiting with friends...), past 4 weeks   |

## The CONTENTS Procedure

| Variables in Creation Order |            |      |     |          |          |                                                                                                                 |
|-----------------------------|------------|------|-----|----------|----------|-----------------------------------------------------------------------------------------------------------------|
| #                           | Variable   | Type | Len | Format   | Informat | Label                                                                                                           |
| 178                         | V00WPRKN1  | Num  | 8   | PAIN1Z.  | 3.       | EV:Right knee pain: walking, last 7 days                                                                        |
| 179                         | V00WPRKN2  | Num  | 8   | PAIN1Z.  | 3.       | EV:Right knee pain: stairs, last 7 days                                                                         |
| 180                         | V00WPRKN3  | Num  | 8   | PAIN1Z.  | 3.       | EV:Right knee pain: in bed, last 7 days                                                                         |
| 181                         | V00WPRKN4  | Num  | 8   | PAIN1Z.  | 3.       | EV:Right knee pain: sit or lie down, last 7 days                                                                |
| 182                         | V00WPRKN5  | Num  | 8   | PAIN1Z.  | 3.       | EV:Right knee pain: standing, last 7 days                                                                       |
| 183                         | V00KPRKN1  | Num  | 8   | PAIN1Z.  | 3.       | EV:Q2a.Right knee pain: twisting/ pivoting on knee, last 7 days                                                 |
| 184                         | V00KPRKN2  | Num  | 8   | PAIN1Z.  | 3.       | EV:Q2b.Right knee pain: straightening knee fully, last 7 days                                                   |
| 185                         | V00KPRKN3  | Num  | 8   | PAIN1Z.  | 3.       | EV:Q2c.Right knee pain: bending knee fully, last 7 days                                                         |
| 186                         | V00P7RKFR  | Num  | 8   | TIME2Z.  | 3.       | EV:Q3.Right knee pain: how often                                                                                |
| 187                         | V00WSRKN1  | Num  | 8   | PAIN1Z.  | 3.       | EV:Right knee stiffness: in morning, last 7 days                                                                |
| 188                         | V00WSRKN2  | Num  | 8   | PAIN1Z.  | 3.       | EV:Right knee stiffness: later in day, last 7 days                                                              |
| 189                         | V00KSXRKN1 | Num  | 8   | TIME3X.  | 3.       | EV:Q6.Right knee symptoms: swelling, last 7 days                                                                |
| 190                         | V00KSXRKN2 | Num  | 8   | TIME3X.  | 3.       | EV:Q7.Right knee symptoms: feel grinding, hear clicking or any other type of noise when knee moves, last 7 days |
| 191                         | V00KSXRKN3 | Num  | 8   | TIME3X.  | 3.       | EV:Q8.Right knee symptoms: knee catch or hang up when moving, last 7 days                                       |
| 192                         | V00KSXRKN4 | Num  | 8   | TIME33X. | 3.       | EV:Q9.Right knee symptoms: straighten knee fully, last 7 days                                                   |
| 193                         | V00KSXRKN5 | Num  | 8   | TIME33X. | 3.       | EV:Q10.Right knee symptoms: bend knee fully, last 7 days                                                        |
| 194                         | V00DIRKN1  | Num  | 8   | PAIN1Z.  | 3.       | EV:Right knee difficulty: down stairs, last 7 days                                                              |
| 195                         | V00DIRKN2  | Num  | 8   | PAIN1Z.  | 3.       | EV:Right knee difficulty: up stairs, last 7 days                                                                |
| 196                         | V00DIRKN3  | Num  | 8   | PAIN1Z.  | 3.       | EV:Right knee difficulty: stand from sitting, last 7 days                                                       |
| 197                         | V00DIRKN4  | Num  | 8   | PAIN1Z.  | 3.       | EV:Right knee difficulty: standing, last 7 days                                                                 |
| 198                         | V00DIRKN5  | Num  | 8   | PAIN1Z.  | 3.       | EV:Right knee difficulty: bending, last 7 days                                                                  |
| 199                         | V00DIRKN6  | Num  | 8   | PAIN1Z.  | 3.       | EV:Right knee difficulty: walking, last 7 days                                                                  |
| 200                         | V00DIRKN7  | Num  | 8   | PAIN1Z.  | 3.       | EV:Right knee difficulty: in car/ out of car, last 7 days                                                       |
| 201                         | V00DIRKN8  | Num  | 8   | PAIN1Z.  | 3.       | EV:Right knee difficulty: shopping, last 7 days                                                                 |
| 202                         | V00DIRKN9  | Num  | 8   | PAIN1Z.  | 3.       | EV:Right knee difficulty: socks on, last 7 days                                                                 |
| 203                         | V00DIRKN10 | Num  | 8   | PAIN1Z.  | 3.       | EV:Right knee difficulty: get out of bed, last 7 days                                                           |
| 204                         | V00DIRKN11 | Num  | 8   | PAIN1Z.  | 3.       | EV:Right knee difficulty: socks off, last 7 days                                                                |
| 205                         | V00DIRKN12 | Num  | 8   | PAIN1Z.  | 3.       | EV:Right knee difficulty: lying down, last 7 days                                                               |

## The CONTENTS Procedure

| Variables in Creation Order |            |      |     |          |          |                                                                                                                 |
|-----------------------------|------------|------|-----|----------|----------|-----------------------------------------------------------------------------------------------------------------|
| #                           | Variable   | Type | Len | Format   | Informat | Label                                                                                                           |
| 206                         | V00DIRKN13 | Num  | 8   | PAIN1Z.  | 3.       | EV:Right knee difficulty: get in/ out of bathtub, last 7 days                                                   |
| 207                         | V00DIRKN14 | Num  | 8   | PAIN1Z.  | 3.       | EV:Right knee difficulty: sitting, last 7 days                                                                  |
| 208                         | V00DIRKN15 | Num  | 8   | PAIN1Z.  | 3.       | EV:Right knee difficulty: on/ off toilet, last 7 days                                                           |
| 209                         | V00DIRKN16 | Num  | 8   | PAIN1Z.  | 3.       | EV:Right knee difficulty: heavy chores, last 7 days                                                             |
| 210                         | V00DIRKN17 | Num  | 8   | PAIN1Z.  | 3.       | EV:Right knee difficulty: light chores, last 7 days                                                             |
| 211                         | V00WPLKN1  | Num  | 8   | PAIN1Z.  | 3.       | EV:Left knee pain: walking, last 7 days                                                                         |
| 212                         | V00WPLKN2  | Num  | 8   | PAIN1Z.  | 3.       | EV:Left knee pain: stairs, last 7 days                                                                          |
| 213                         | V00WPLKN3  | Num  | 8   | PAIN1Z.  | 3.       | EV:Left knee pain: in bed, last 7 days                                                                          |
| 214                         | V00WPLKN4  | Num  | 8   | PAIN1Z.  | 3.       | EV:Left knee pain: sit or lie down, last 7 days                                                                 |
| 215                         | V00WPLKN5  | Num  | 8   | PAIN1Z.  | 3.       | EV:Left knee pain: standing, last 7 days                                                                        |
| 216                         | V00KPLKN1  | Num  | 8   | PAIN1Z.  | 3.       | EV:Q13a.Left knee pain: twisting/ pivoting on knee, last 7 days                                                 |
| 217                         | V00KPLKN2  | Num  | 8   | PAIN1Z.  | 3.       | EV:Q13b.Left knee pain: straightening knee fully, last 7 days                                                   |
| 218                         | V00KPLKN3  | Num  | 8   | PAIN1Z.  | 3.       | EV:Q13c.Left knee pain: bending knee fully, last 7 days                                                         |
| 219                         | V00P7LKFR  | Num  | 8   | TIME2Z.  | 3.       | EV:Q14.Left knee pain: how often                                                                                |
| 220                         | V00WSLKN1  | Num  | 8   | PAIN1Z.  | 3.       | EV:Left knee stiffness: in morning, last 7 days                                                                 |
| 221                         | V00WSLKN2  | Num  | 8   | PAIN1Z.  | 3.       | EV:Left knee stiffness: later in day, last 7 days                                                               |
| 222                         | V00KSXLKN1 | Num  | 8   | TIME3X.  | 3.       | EV:Q17.Left knee symptoms: swelling, last 7 days                                                                |
| 223                         | V00KSXLKN2 | Num  | 8   | TIME3X.  | 3.       | EV:Q18.Left knee symptoms: feel grinding, hear clicking or any other type of noise when knee moves, last 7 days |
| 224                         | V00KSXLKN3 | Num  | 8   | TIME3X.  | 3.       | EV:Q19.Left knee symptoms: knee catch or hang up when moving, last 7 days                                       |
| 225                         | V00KSXLKN4 | Num  | 8   | TIME33X. | 3.       | EV:Q20.Left knee symptoms: straighten knee fully, last 7 days                                                   |
| 226                         | V00KSXLKN5 | Num  | 8   | TIME33X. | 3.       | EV:Q21.Left knee symptoms: bend knee fully, last 7 days                                                         |
| 227                         | V00DILKN1  | Num  | 8   | PAIN1Z.  | 3.       | EV:Left knee difficulty: down stairs, last 7 days                                                               |
| 228                         | V00DILKN2  | Num  | 8   | PAIN1Z.  | 3.       | EV:Left knee difficulty: up stairs, last 7 days                                                                 |
| 229                         | V00DILKN3  | Num  | 8   | PAIN1Z.  | 3.       | EV:Left knee difficulty: stand from sitting, last 7 days                                                        |
| 230                         | V00DILKN4  | Num  | 8   | PAIN1Z.  | 3.       | EV:Left knee difficulty: standing, last 7 days                                                                  |
| 231                         | V00DILKN5  | Num  | 8   | PAIN1Z.  | 3.       | EV:Left knee difficulty: bending, last 7 days                                                                   |
| 232                         | V00DILKN6  | Num  | 8   | PAIN1Z.  | 3.       | EV:Left knee difficulty: walking, last 7 days                                                                   |



## The CONTENTS Procedure

| Variables in Creation Order |            |      |     |           |          |                                                                                                                                     |
|-----------------------------|------------|------|-----|-----------|----------|-------------------------------------------------------------------------------------------------------------------------------------|
| #                           | Variable   | Type | Len | Format    | Informat | Label                                                                                                                               |
| 233                         | V00DILKN7  | Num  | 8   | PAIN1Z.   | 3.       | EV:Left knee difficulty: in car/ out of car, last 7 days                                                                            |
| 234                         | V00DILKN8  | Num  | 8   | PAIN1Z.   | 3.       | EV:Left knee difficulty: shopping, last 7 days                                                                                      |
| 235                         | V00DILKN9  | Num  | 8   | PAIN1Z.   | 3.       | EV:Left knee difficulty: socks on, last 7 days                                                                                      |
| 236                         | V00DILKN10 | Num  | 8   | PAIN1Z.   | 3.       | EV:Left knee difficulty: get out of bed, last 7 days                                                                                |
| 237                         | V00DILKN11 | Num  | 8   | PAIN1Z.   | 3.       | EV:Left knee difficulty: socks off, last 7 days                                                                                     |
| 238                         | V00DILKN12 | Num  | 8   | PAIN1Z.   | 3.       | EV:Left knee difficulty: lying down, last 7 days                                                                                    |
| 239                         | V00DILKN13 | Num  | 8   | PAIN1Z.   | 3.       | EV:Left knee difficulty: get in/ out of bathtub, last 7 days                                                                        |
| 240                         | V00DILKN14 | Num  | 8   | PAIN1Z.   | 3.       | EV:Left knee difficulty: sitting, last 7 days                                                                                       |
| 241                         | V00DILKN15 | Num  | 8   | PAIN1Z.   | 3.       | EV:Left knee difficulty: on/ off toilet, last 7 days                                                                                |
| 242                         | V00DILKN16 | Num  | 8   | PAIN1Z.   | 3.       | EV:Left knee difficulty: heavy chores, last 7 days                                                                                  |
| 243                         | V00DILKN17 | Num  | 8   | PAIN1Z.   | 3.       | EV:Left knee difficulty: light chores, last 7 days                                                                                  |
| 244                         | V00KOOSFX1 | Num  | 8   | PAIN1Z.   | 3.       | EV:Q23a.Either knee difficulty: squatting, last 7 days                                                                              |
| 245                         | V00KOOSFX2 | Num  | 8   | PAIN1Z.   | 3.       | EV:Q23b.Either knee difficulty: running, last 7 days                                                                                |
| 246                         | V00KOOSFX3 | Num  | 8   | PAIN1Z.   | 3.       | EV:Q23c.Either knee difficulty: jumping, last 7 days                                                                                |
| 247                         | V00KOOSFX4 | Num  | 8   | PAIN1Z.   | 3.       | EV:Q23d.Either knee difficulty: twisting/ pivoting on injured knee, last 7 days                                                     |
| 248                         | V00KOOSFX5 | Num  | 8   | PAIN1Z.   | 3.       | EV:Q23e.Either knee difficulty: kneeling, last 7 days                                                                               |
| 249                         | V00KQOL1   | Num  | 8   | TIME2C.   | 3.       | EV:Q24.Quality of life: how often aware of problems with knee(s)                                                                    |
| 250                         | V00KQOL2   | Num  | 8   | KQOL.     | 3.       | EV:Q25.Quality of life: modified lifestyle to avoid potentially damaging activities to knee(s)                                      |
| 251                         | V00KQOL3   | Num  | 8   | KQOL3Z.   | 3.       | EV:Q26.Quality of life: how much troubled with lack of confidence in knee(s)                                                        |
| 252                         | V00KQOL4   | Num  | 8   | PAIN1Z.   | 3.       | EV:Q27.Quality of life: in general, how much difficulty have with knee(s)                                                           |
| 253                         | V00KGLRS   | Num  | 8   | QOLSCALE. | 3.       | EV:Q28.Considering all ways knee pain and arthritis affect you, how are you doing today? Rated on scale of 0- 10                    |
| 254                         | P02KPNRCV  | Num  | 8   | YNDK.     |          | IEI:Q9a.Right knee pain, aching or stiffness: more than half the days of a month, past 12 months (calc, used for study eligibility) |
| 255                         | P02KPNLCV  | Num  | 8   | YNDK.     |          | IEI:Q9b.Left knee pain, aching or stiffness: more than half the days of a month, past 12 months (calc, used for study eligibility)  |

## The CONTENTS Procedure

| Variables in Creation Order |            |      |     |         |          |                                                                                                                                    |
|-----------------------------|------------|------|-----|---------|----------|------------------------------------------------------------------------------------------------------------------------------------|
| #                           | Variable   | Type | Len | Format  | Informat | Label                                                                                                                              |
| 256                         | P01KPR30CV | Num  | 8   | YNDK.   |          | SV:Q16a.Right knee pain, aching or stiffness: more than half the days, past 30 days (calc)                                         |
| 257                         | P01KPL30CV | Num  | 8   | YNDK.   |          | SV:Q19a.Left knee pain, aching or stiffness: more than half the days, past 30 days (calc)                                          |
| 258                         | P01KPACTCV | Num  | 8   | KPACT.  |          | SV:Either knee, limits or avoids activities due to pain, aching or stiffness, past 30 days (calc)                                  |
| 259                         | P01HPR12CV | Num  | 8   | YNDK.   |          | SV:Q38a.Right hip pain, aching or stiffness: more than half the days of a month, past 12 months (calc)                             |
| 260                         | P01HPL12CV | Num  | 8   | YNDK.   |          | SV:Q39a.Left hip pain, aching or stiffness: more than half the days of a month, past 12 months (calc)                              |
| 261                         | P01BPTOT   | Num  | 8   |         |          | SV:Total days in bed and/ or limited activity due to back pain, past 30 days (calc)                                                |
| 262                         | V00HSPSS   | Num  | 8   | 5.2     |          | SAQ:SF- 12: physical summary scale for the MOS 12- item short- form health survey (SF- 12) v2 (calc)                               |
| 263                         | V00HSMSS   | Num  | 8   | 5.2     |          | SAQ:SF- 12: mental summary scale for the MOS 12- item short- form health survey (SF- 12) v2 (calc)                                 |
| 264                         | V00WOMKPR  | Num  | 8   | 5.1     |          | EV:Right knee: WOMAC Pain Score (calc)                                                                                             |
| 265                         | V00KOOSKPR | Num  | 8   | 5.1     |          | EV:Right knee: KOOS Pain Score (calc)                                                                                              |
| 266                         | V00WOMSTFR | Num  | 8   | 5.1     |          | EV:Right knee: WOMAC Stiffness Score (calc)                                                                                        |
| 267                         | V00KOOSYMR | Num  | 8   | 5.1     |          | EV:Right knee: KOOS Symptoms Score (calc)                                                                                          |
| 268                         | V00WOMADLR | Num  | 8   | 5.1     |          | EV:Right knee: WOMAC Disability Score (calc)                                                                                       |
| 269                         | V00WOMKPL  | Num  | 8   | 5.1     |          | EV:Left knee: WOMAC Pain Score (calc)                                                                                              |
| 270                         | V00KOOSKPL | Num  | 8   | 5.1     |          | EV:Left knee: KOOS Pain Score (calc)                                                                                               |
| 271                         | V00WOMSTFL | Num  | 8   | 5.1     |          | EV:Left knee: WOMAC Stiffness Score (calc)                                                                                         |
| 272                         | V00KOOSYML | Num  | 8   | 5.1     |          | EV:Left knee: KOOS Symptoms Score (calc)                                                                                           |
| 273                         | V00WOMADLL | Num  | 8   | 5.1     |          | EV:Left knee: WOMAC Disability Score (calc)                                                                                        |
| 274                         | V00KOOSFSR | Num  | 8   | 5.1     |          | EV:KOOS Function, Sports, and Recreational Activities Score (calc)                                                                 |
| 275                         | V00KOOSQOL | Num  | 8   | 5.1     |          | EV:KOOS Quality of Life Score (calc)                                                                                               |
| 276                         | P01SXKOA   | Num  | 8   | KNEESF. |          | SV:Baseline symptomatic knee OA status by person (calc, used for study elig (>0) and in OAI definition of cohort status)           |
| 277                         | P01KPR12CV | Num  | 8   | YNDK.   |          | SV:Q15a.Right knee pain, aching or stiffness: more than half the days of a month, past 12 months (calc)                            |
| 278                         | P01KPL12CV | Num  | 8   | YNDK.   |          | SV:Q18a.Left knee pain, aching or stiffness: more than half the days of a month, past 12 months (calc)                             |
| 279                         | P01KPA30CV | Num  | 8   | YNDK.   |          | SV:Q20b.Either knee, avoid/ reduce pain, aching or stiffness by changing or cutting back on normal activities, past 30 days (calc) |

## The CONTENTS Procedure

| Variables in Creation Order |            |      |     |          |          |                                                                                                                                  |
|-----------------------------|------------|------|-----|----------|----------|----------------------------------------------------------------------------------------------------------------------------------|
| #                           | Variable   | Type | Len | Format   | Informat | Label                                                                                                                            |
| 280                         | V00P7RKRCV | Num  | 8   | PNSCALE. |          | EV:Q3a.Right knee pain: severity, past 7 days, rated on scale of 0- 10 (calc)                                                    |
| 281                         | V00P7LKRCV | Num  | 8   | PNSCALE. |          | EV:Q14a.Left knee pain: severity, past 7 days, rated on scale of 0- 10 (calc)                                                    |
| 282                         | P01PMRKRCV | Num  | 8   | PNSCALE. |          | SV:Q16b.Right knee pain: severity, past 30 days, rated on scale of 0- 10 (calc)                                                  |
| 283                         | P01PMLKRCV | Num  | 8   | PNSCALE. |          | SV:Q19b.Left knee pain: severity, past 30 days, rated on scale of 0- 10 (calc)                                                   |
| 284                         | P01TJE30CV | Num  | 8   | YNDK.    |          | SV:Q45b.TMJ: jaw joint or in front of ear, experienced pain or aching, past 30 days (calc)                                       |
| 285                         | P01TJF30CV | Num  | 8   | YNDK.    |          | SV:Q46b.TMJ: across face or cheek, experienced pain or aching, past 30 days (calc)                                               |
| 286                         | P01TJE30WC | Num  | 8   | TIME21X. |          | SV:Q45bii.TMJ: jaw joint or in front of ear, how often worried or concerned about pain or aching, past 30 days (calc)            |
| 287                         | P01TJF30WC | Num  | 8   | TIME21X. |          | SV:Q46bii.TMJ: across face or cheek, how often worried or concerned about pain or aching, past 30 days (calc)                    |
| 288                         | V00WOMTSL  | Num  | 8   | 5.1      |          | EV:Left knee: WOMAC Total Score (calc)                                                                                           |
| 289                         | V00WOMTSR  | Num  | 8   | 5.1      |          | EV:Right knee: WOMAC Total Score (calc)                                                                                          |
| 290                         | P01RKSX    | Num  | 8   | KPNFR.   |          | SV:Right knee baseline symptom status (combines past 30 days and 12 months, calc, used in OAI definition of symptomatic knee OA) |
| 291                         | P01LKXSX   | Num  | 8   | KPNFR.   |          | SV:Left knee baseline symptom status (combines past 30 days and 12 months, calc, used in OAI definition of symptomatic knee OA)  |
| 292                         | P01LSXKOA  | Num  | 8   | YNDK.    |          | SV:Left knee baseline symptomatic OA status (calc)                                                                               |
| 293                         | P01RSXKOA  | Num  | 8   | YNDK.    |          | SV:Right knee baseline symptomatic OA status (calc)                                                                              |
| 294                         | P01BPDAYCV | Num  | 8   |          |          | SV:Q43dii.How many days limit activities due to back pain, past 30 days (calc)                                                   |
| 295                         | P01BPBEDCV | Num  | 8   |          |          | SV:Q43di.How many days stay in bed due to back pain, past 30 days (calc)                                                         |
| 296                         | P01BPACTCV | Num  | 8   | YNDK.    |          | SV:Q43d.Limit activities due to back pain, past 30 days (calc)                                                                   |
| 297                         | P01KSX     | Num  | 8   | SXBYPER. |          | SV:Frequent knee pain status by person (calc)                                                                                    |
| 298                         | P01BL12SXL | Num  | 8   | BLPAIN.  |          | SV:Left knee baseline frequent knee pain status (IEI, SV, both, or neither) (calc)                                               |
| 299                         | P01BL12SXR | Num  | 8   | BLPAIN.  |          | SV:Right knee baseline frequent knee pain status (IEI, SV, both, or neither) (calc)                                              |
| 300                         | P01KPACDCV | Num  | 8   |          |          | SV:Q20a.Either knee, how many days limit activities due to pain, aching or stiffness, past 30 days (calc)                        |

## The CONTENTS Procedure

| Variables in Creation Order |            |      |     |        |          |                                                                                                                       |
|-----------------------------|------------|------|-----|--------|----------|-----------------------------------------------------------------------------------------------------------------------|
| #                           | Variable   | Type | Len | Format | Informat | Label                                                                                                                 |
| 301                         | P01LKP30CV | Num  | 8   | YNDK.  |          | SV:Q19.Left knee pain, aching or stiffness: any, past 30 days (calc)                                                  |
| 302                         | P01RKP30CV | Num  | 8   | YNDK.  |          | SV:Q16.Right knee pain, aching or stiffness: any, past 30 days (calc)                                                 |
| 303                         | P02KPMED   | Num  | 8   | YNDK.  | 3.       | IEI:Q10.Either knee, used medication for pain, aching or stiffness, past 12 months                                    |
| 304                         | P02KINJ    | Num  | 8   | YNDK.  | 3.       | IEI:Q11.Either knee, ever injured so badly difficult to walk for at least one week (used for study eligibility)       |
| 305                         | P02KSURG   | Num  | 8   | YNDK.  | 3.       | IEI:Q12.Either knee, history of knee surgery (incl. arthroscopy, ligament repair, meniscectomy; used for study elig.) |
| 306                         | P02CNCR3   | Num  | 8   | YNDK.  | 3.       | IEI:Q19.Treated for cancer or been told by doctor that you had cancer or malignant tumor, past 3 years                |
| 307                         | P02CNC3    | Num  | 8   | YNDK.  | 2.       | IEI:Q20a.Cancer type: breast, self-reported                                                                           |
| 308                         | P02CNC4    | Num  | 8   | YNDK.  | 2.       | IEI:Q20a.Cancer type: cervical, self-reported                                                                         |
| 309                         | P02CNC13   | Num  | 8   | YNDK.  | 2.       | IEI:Q20a.Cancer type: prostate, self-reported                                                                         |
| 310                         | P02CNC14   | Num  | 8   | YNDK.  | 2.       | IEI:Q20a.Cancer type: rectal, self-reported                                                                           |
| 311                         | P02CNC15   | Num  | 8   | YNDK.  | 2.       | IEI:Q20a.Cancer type: skin, self-reported                                                                             |
| 312                         | P02CNMEL   | Num  | 8   | YNDK.  | 2.       | IEI:Q20a.Cancer type: nonmelanoma skin cancer, self-reported                                                          |
| 313                         | P02CSY     | Num  | 8   | YNDK.  | 5.       | IEI:Q20b.Cancer removed by surgery: yes or watchful waiting for prostate cancer                                       |
| 314                         | P02CMN     | Num  | 8   | YNDK.  | 5.       | IEI:Q20c.Doctor said cancer spread to other parts of body: no                                                         |
| 315                         | P02CMDK    | Num  | 8   | YNDK.  | 3.       | IEI:Q20c.Doctor said cancer spread to other parts of body: don't know                                                 |
| 316                         | P01RAIA    | Num  | 8   | YNDK.  | 3.       | SV:Q1.Doctor ever said you have rheumatoid arthritis or other inflammatory arthritis                                  |
| 317                         | P01RAJS1HR | Num  | 8   | YNDK.  | 3.       | SV:Q2.RA symptoms: ever had joint stiffness in any joints lasting at least one hour in the morning                    |
| 318                         | P01RAFT6R  | Num  | 8   | YNDK.  | 3.       | SV:Q4b.RA symptoms: right fingers or thumb swelling, ever had lasting more than 6 weeks                               |
| 319                         | P01RAFT6L  | Num  | 8   | YNDK.  | 3.       | SV:Q4b.RA symptoms: left fingers or thumb swelling, ever had lasting more than 6 weeks                                |
| 320                         | P01RAKN6R  | Num  | 8   | YNDK.  | 3.       | SV:Q4d.RA symptoms: right knee swelling, ever had lasting more than 6 weeks                                           |
| 321                         | P01RAKN6L  | Num  | 8   | YNDK.  | 3.       | SV:Q4d.RA symptoms: left knee swelling, ever had lasting more than 6 weeks                                            |
| 322                         | P01RA3YES  | Num  | 8   | YNDK.  | 2.       | SV:Q5.RA symptoms: 3 or more Yes responses to questions #2a, #3, and #4a - d                                          |

## The CONTENTS Procedure

| Variables in Creation Order |            |      |     |        |          |                                                                                                         |
|-----------------------------|------------|------|-----|--------|----------|---------------------------------------------------------------------------------------------------------|
| #                           | Variable   | Type | Len | Format | Informat | Label                                                                                                   |
| 323                         | P01RA1YES  | Num  | 8   | YNDK.  | 2.       | SV:Q6.RA symptoms: at least one Yes response for any wrist or finger in question #4a - b                |
| 324                         | P01RARLYES | Num  | 8   | YNDK.  | 2.       | SV:Q7.RA symptoms: both right and left marked Yes for wrist, fingers, elbow or knee in question #4a - d |
| 325                         | P01RATEST  | Num  | 8   | YNDK.  | 3.       | SV:Q8.RA Symptoms: ever had blood test for rheumatoid arthritis                                         |
| 326                         | P01RATOT3  | Num  | 8   | YNDK.  | 3.       | SV:Q9.RA symptoms: total score more than 3                                                              |
| 327                         | P01ARTHOTH | Num  | 8   | YNDK.  | 3.       | SV:Q10.Doctor ever said you have some other type of arthritis                                           |
| 328                         | P01ARTDOC  | Num  | 8   | YNDK.  | 3.       | SV:Q11.Currently seeing doctor or other health care professional for arthritis                          |
| 329                         | P01KPMED   | Num  | 8   | YNDK.  | 3.       | SV:Q21.Either knee, used medication for pain, aching or stiffness, past 12 months                       |
| 330                         | P01INJR    | Num  | 8   | YNDK.  | 3.       | SV:Q24.Right knee, ever injured badly enough to limit ability to walk for at least two days             |
| 331                         | P01INJR1   | Num  | 8   | 3.     | 3.       | SV:Q24ai.Right knee, how old at first injury                                                            |
| 332                         | P01INJR2   | Num  | 8   | 3.     | 3.       | SV:Q24aii.Right knee, how old at second injury                                                          |
| 333                         | P01INJR3   | Num  | 8   | 3.     | 3.       | SV:Q24aiii.Right knee, how old at third injury                                                          |
| 334                         | P01KSURGR  | Num  | 8   | YNDK.  | 3.       | SV:Q25.Right knee, ever have surgery or arthroscopy                                                     |
| 335                         | P01KRSR    | Num  | 8   | YNDK.  | 3.       | SV:Q26.Right knee, ever have replacement surgery where all or part of joint was replaced                |
| 336                         | P01KRSRA   | Num  | 8   | 3.     | 3.       | SV:Q26a.Right knee, how old when first had replaced                                                     |
| 337                         | P01ARTR    | Num  | 8   | YNDK.  | 3.       | SV:Q27.Right knee, ever have arthroscopy (where they put a scope in knee)                               |
| 338                         | P01ARTR1   | Num  | 8   | 3.     | 3.       | SV:Q27ai.Right knee, how old at first arthroscopy                                                       |
| 339                         | P01ARTR2   | Num  | 8   | 3.     | 3.       | SV:Q27aii.Right knee, how old at second arthroscopy                                                     |
| 340                         | P01ARTR3   | Num  | 8   | 3.     | 3.       | SV:Q27aiii.Right knee, how old at third arthroscopy                                                     |
| 341                         | P01ARTRINJ | Num  | 8   | YNDK.  | 3.       | SV:Q27b.Right knee, was at least one arthroscopy to repair injury                                       |
| 342                         | P01MENR    | Num  | 8   | YNDK.  | 3.       | SV:Q28.Right knee, ever have meniscectomy (where they repaired or cut away torn meniscus or cartilage)  |
| 343                         | P01MENR1   | Num  | 8   | 3.     | 3.       | SV:Q28ai.Right knee, how old at first meniscectomy                                                      |
| 344                         | P01MENR2   | Num  | 8   | 3.     | 3.       | SV:Q28aii.Right knee, how old at second meniscectomy                                                    |
| 345                         | P01MENR3   | Num  | 8   | 3.     | 3.       | SV:Q28aiii.Right knee, how old at third meniscectomy                                                    |
| 346                         | P01MENRINJ | Num  | 8   | YNDK.  | 3.       | SV:Q28b.Right knee, was at least one meniscectomy to repair an injury                                   |
| 347                         | P01LRR     | Num  | 8   | YNDK.  | 3.       | SV:Q29.Right knee, ever have ligament repair surgery                                                    |

## The CONTENTS Procedure

| Variables in Creation Order |            |      |     |        |          |                                                                                                       |
|-----------------------------|------------|------|-----|--------|----------|-------------------------------------------------------------------------------------------------------|
| #                           | Variable   | Type | Len | Format | Informat | Label                                                                                                 |
| 348                         | P01LRR1    | Num  | 8   | 3.     | 3.       | SV:Q29ai.Right knee, how old at first ligament repair surgery                                         |
| 349                         | P01LRR2    | Num  | 8   | 3.     | 3.       | SV:Q29aai.Right knee, how old at second ligament repair surgery                                       |
| 350                         | P01LRR3    | Num  | 8   | 3.     | 3.       | SV:Q29aiii.Right knee, how old at third ligament repair surgery                                       |
| 351                         | P01OTSURGR | Num  | 8   | YNDK.  | 3.       | SV:Q30.Right knee, ever have any other kind of surgery                                                |
| 352                         | P01OTSR1   | Num  | 8   | 3.     | 3.       | SV:Q30bi.Right knee, how old at first other surgery                                                   |
| 353                         | P01OTSR2   | Num  | 8   | 3.     | 3.       | SV:Q30bii.Right knee, how old at second other surgery                                                 |
| 354                         | P01OTSR3   | Num  | 8   | 3.     | 3.       | SV:Q30biii.Right knee, how old at third other surgery                                                 |
| 355                         | P01OTSRINJ | Num  | 8   | YNDK.  | 3.       | SV:Q30c.Right knee, was at least one other surgery to repair an injury                                |
| 356                         | P01INJL    | Num  | 8   | YNDK.  | 3.       | SV:Q31.Left knee, ever injured badly enough to limit ability to walk for at least two days            |
| 357                         | P01INJL1   | Num  | 8   | 3.     | 3.       | SV:Q31i.Left knee, how old at first injury                                                            |
| 358                         | P01INJL2   | Num  | 8   | 3.     | 3.       | SV:Q31ii.Left knee, how old at second injury                                                          |
| 359                         | P01INJL3   | Num  | 8   | 3.     | 3.       | SV:Q31iii.Left knee, how old at third injury                                                          |
| 360                         | P01KSURGL  | Num  | 8   | YNDK.  | 3.       | SV:Q32.Left knee, ever have surgery or arthroscopy                                                    |
| 361                         | P01KRSL    | Num  | 8   | YNDK.  | 3.       | SV:Q33.Left knee, ever have replacement where all or part of joint was replaced                       |
| 362                         | P01KRSLA   | Num  | 8   | 3.     | 3.       | SV:Q33a.Left knee, how old when first had replaced                                                    |
| 363                         | P01ARTL    | Num  | 8   | YNDK.  | 3.       | SV:Q34.Left knee, ever have arthroscopy (where they put a scope in knee)                              |
| 364                         | P01ARTL1   | Num  | 8   | 3.     | 3.       | SV:Q34ai.Left knee, how old at first arthroscopy                                                      |
| 365                         | P01ARTL2   | Num  | 8   | 3.     | 3.       | SV:Q34aai.Left knee, how old at second arthroscopy                                                    |
| 366                         | P01ARTL3   | Num  | 8   | 3.     | 3.       | SV:Q34aiii.Left knee, how old at third arthroscopy                                                    |
| 367                         | P01ARTLINJ | Num  | 8   | YNDK.  | 3.       | SV:Q34b.Left knee, was at least one arthroscopy to repair injury                                      |
| 368                         | P01MENL    | Num  | 8   | YNDK.  | 3.       | SV:Q35.Left knee, ever have meniscectomy (where they repaired or cut away torn meniscus or cartilage) |
| 369                         | P01MENL1   | Num  | 8   | 3.     | 3.       | SV:Q35ai.Left knee, how old at first meniscectomy                                                     |
| 370                         | P01MENL2   | Num  | 8   | 3.     | 3.       | SV:Q35aai.Left knee, how old at second meniscectomy                                                   |
| 371                         | P01MENL3   | Num  | 8   | 3.     | 3.       | SV:Q35aiii.Left knee, how old at third meniscectomy                                                   |
| 372                         | P01MENLINJ | Num  | 8   | YNDK.  | 3.       | SV:Q35b.Left knee, was at least one meniscectomy to repair an injury                                  |
| 373                         | P01LRL     | Num  | 8   | YNDK.  | 3.       | SV:Q36.Left knee, ever have ligament repair surgery                                                   |

## The CONTENTS Procedure

| Variables in Creation Order |            |      |     |         |          |                                                                                  |
|-----------------------------|------------|------|-----|---------|----------|----------------------------------------------------------------------------------|
| #                           | Variable   | Type | Len | Format  | Informat | Label                                                                            |
| 374                         | P01LRL1    | Num  | 8   | 3.      | 3.       | SV:Q36ai.Left knee, how old at first ligament repair surgery                     |
| 375                         | P01LRL2    | Num  | 8   | 3.      | 3.       | SV:Q36aii.Left knee, how old at second ligament repair surgery                   |
| 376                         | P01LRL3    | Num  | 8   | 3.      | 3.       | SV:Q36aiii.Left knee, how old at third ligament repair surgery                   |
| 377                         | P01OTSURGL | Num  | 8   | YNDK.   | 3.       | SV:Q37.Left knee, ever have any other kind of surgery                            |
| 378                         | P01OTSL1   | Num  | 8   | 3.      | 3.       | SV:Q37bi.Left knee, how old at first other surgery                               |
| 379                         | P01OTSL2   | Num  | 8   | 3.      | 3.       | SV:Q37bii.Left knee, how old at second other surgery                             |
| 380                         | P01OTSL3   | Num  | 8   | 3.      | 3.       | SV:Q37biii.Left knee, how old at third other surgery                             |
| 381                         | P01OTSLINJ | Num  | 8   | YNDK.   | 3.       | SV:Q37c.Left knee, was at least one other surgery to repair an injury            |
| 382                         | P01HRS     | Num  | 8   | YNDK.   | 3.       | SV:Q40.Ever had hip replacement surgery where all or part of joint was replaced  |
| 383                         | P01HRSR    | Num  | 8   | YNDK.   | 3.       | SV:Q41.Right hip, ever had replaced                                              |
| 384                         | P01HRSROA  | Num  | 8   | YNDK.   | 3.       | SV:Q41a.Right hip replacement reason, osteoarthritis or degenerative arthritis   |
| 385                         | P01HRSRDK  | Num  | 8   | YNDK.   | 3.       | SV:Q41a.Right hip replacement reason, don't know                                 |
| 386                         | P01HRSL    | Num  | 8   | YNDK.   | 3.       | SV:Q42.Left hip, ever had replaced                                               |
| 387                         | P01HRSLOA  | Num  | 8   | YNDK.   | 3.       | SV:Q42a.Left hip replacement reason, osteoarthritis or degenerative arthritis    |
| 388                         | P01HRSLDK  | Num  | 8   | YNDK.   | 3.       | SV:Q42a.Left hip replacement reason, don't know                                  |
| 389                         | P01PREGEV  | Num  | 8   | YNDK.   | 3.       | SV:Q1.Have you ever been pregnant                                                |
| 390                         | P01OVREM   | Num  | 8   | YNDK.   | 3.       | SV:Q2.Ever had ovary removed                                                     |
| 391                         | P01OV1AGE  | Num  | 8   | 3.      | 3.       | SV:Q2bi.How old when ovary/ ovaries removed (first surgery)                      |
| 392                         | P01OV2AGE  | Num  | 8   | 3.      | 3.       | SV:Q2bii.How old when ovary removed (second surgery)                             |
| 393                         | P01HYS     | Num  | 8   | YNDK.   | 3.       | SV:Q3.Ever had a hysterectomy (surgery to remove uterus or womb)                 |
| 394                         | P01HYSAGE  | Num  | 8   | 3.      | 3.       | SV:Q3a.How old when had hysterectomy                                             |
| 395                         | P01MENSTR  | Num  | 8   | YEAR2Z. | 3.       | SV:Q5.When was your last natural menstrual period                                |
| 396                         | V00HRTAT   | Num  | 8   | YNDK.   | 3.       | SAQ:Q17.Charlson Comorbidity: ever had heart attack                              |
| 397                         | V00HRTFAIL | Num  | 8   | YNDK.   | 3.       | SAQ:Q18.Charlson Comorbidity: ever treated for heart failure                     |
| 398                         | V00BYPLEG  | Num  | 8   | YNDK.   | 3.       | SAQ:Q19.Charlson Comorbidity: had operation to unclog or bypass arteries in legs |

## The CONTENTS Procedure

| Variables in Creation Order |            |      |     |         |          |                                                                                                                                         |
|-----------------------------|------------|------|-----|---------|----------|-----------------------------------------------------------------------------------------------------------------------------------------|
| #                           | Variable   | Type | Len | Format  | Informat | Label                                                                                                                                   |
| 399                         | V00STROKE  | Num  | 8   | YNDK.   | 3.       | SAQ:Q20.Charlson Comorbidity: had stroke, cerebrovascular accident, blood clot or bleeding in brain, or transient ischemic attack (TIA) |
| 400                         | V00ASTHMA  | Num  | 8   | YNDK.   | 3.       | SAQ:Q21.Charlson Comorbidity: have asthma                                                                                               |
| 401                         | V00ASTMEDS | Num  | 8   | YNDK.   | 3.       | SAQ:Q21a.Charlson Comorbidity: take medicines for asthma                                                                                |
| 402                         | V00AMWHEN  | Num  | 8   | ASTHMA. | 3.       | SAQ:Q21ai.Charlson Comorbidity: when usually take medicine for asthma                                                                   |
| 403                         | V00LUNG    | Num  | 8   | YNDK.   | 3.       | SAQ:Q22.Charlson Comorbidity: have emphysema, chronic bronchitis, or chronic obstructive lung disease (also called COPD)                |
| 404                         | V00LGMEDS  | Num  | 8   | YNDK.   | 3.       | SAQ:Q22a.Charlson Comorbidity: take medicines for lung disease                                                                          |
| 405                         | V00LMWHEN  | Num  | 8   | ASTHMA. | 3.       | SAQ:Q22ai.Charlson Comorbidity: when usually take medicine for lung disease                                                             |
| 406                         | V00ULCER   | Num  | 8   | YNDK.   | 3.       | SAQ:Q23.Charlson Comorbidity: have stomach ulcers or peptic ulcer disease                                                               |
| 407                         | V00ULCERDX | Num  | 8   | YNDK.   | 3.       | SAQ:Q23a.Charlson Comorbidity: stomach ulcers or peptic ulcer disease diagnosed by endoscopy, upper GI or barium swallow study          |
| 408                         | V00DIAB    | Num  | 8   | YNDK.   | 3.       | SAQ:Q24.Charlson Comorbidity: have diabetes (high blood sugar)                                                                          |
| 409                         | V00DIABTX1 | Num  | 8   | YNDK.   | 2.       | SAQ:Q24a.Charlson Comorbidity: diabetes treated by modifying diet                                                                       |
| 410                         | V00DIABTX2 | Num  | 8   | YNDK.   | 2.       | SAQ:Q24a.Charlson Comorbidity: diabetes treated with medications taken by mouth                                                         |
| 411                         | V00DIABTX3 | Num  | 8   | YNDK.   | 2.       | SAQ:Q24a.Charlson Comorbidity: diabetes treated with insulin injections                                                                 |
| 412                         | V00DIABTX4 | Num  | 8   | YNDK.   | 2.       | SAQ:Q24a.Charlson Comorbidity: diabetes not treated/ watchful waiting                                                                   |
| 413                         | V00DIABPR1 | Num  | 8   | YNDK.   | 2.       | SAQ:Q24b.Charlson Comorbidity: diabetes caused problems with kidneys                                                                    |
| 414                         | V00DIABPR2 | Num  | 8   | YNDK.   | 2.       | SAQ:Q24b.Charlson Comorbidity: diabetes caused problems with eyes, treated by ophthalmologist                                           |
| 415                         | V00DIABPR3 | Num  | 8   | YNDK.   | 2.       | SAQ:Q24b.Charlson Comorbidity: diabetes has not caused problems                                                                         |
| 416                         | V00KIDFXN  | Num  | 8   | YNDK.   | 3.       | SAQ:Q25a.Charlson Comorbidity: ever had problem with kidneys, poor kidney function (blood tests showed high creatinine)                 |
| 417                         | V00KIDTRAN | Num  | 8   | YNDK.   | 3.       | SAQ:Q25c.Charlson Comorbidity: ever had problem with kidneys, received kidney transplant                                                |
| 418                         | V00RA      | Num  | 8   | YNDK.   | 3.       | SAQ:Q26.Charlson Comorbidity: have rheumatoid arthritis                                                                                 |



## The CONTENTS Procedure

| Variables in Creation Order |            |      |     |        |          |                                                                                          |
|-----------------------------|------------|------|-----|--------|----------|------------------------------------------------------------------------------------------|
| #                           | Variable   | Type | Len | Format | Informat | Label                                                                                    |
| 419                         | V00RAMEDS  | Num  | 8   | YNDK.  | 3.       | SAQ:Q26a.Charlson Comorbidity: take medicines for rheumatoid arthritis regularly         |
| 420                         | V00POLYRH  | Num  | 8   | YNDK.  | 3.       | SAQ:Q28.Charlson Comorbidity: have polymyalgia rheumatica                                |
| 421                         | V00LIVDAM  | Num  | 8   | YNDK.  | 3.       | SAQ:Q29b.Charlson Comorbidity: have cirrhosis or serious liver damage                    |
| 422                         | V00CANCER  | Num  | 8   | YNDK.  | 3.       | SAQ:Q29e.Charlson Comorbidity: have cancer, other than skin cancer, leukemia or lymphoma |
| 423                         | V00BONEFX  | Num  | 8   | YNDK.  | 3.       | SAQ:Q30.Doctor ever said you broke or fractured bone after age 45                        |
| 424                         | V00HIPFX   | Num  | 8   | YNDK.  | 3.       | SAQ:Q30a.Doctor ever said you broke or fractured hip                                     |
| 425                         | V00HIPFXAG | Num  | 8   | 3.     | 3.       | SAQ:Q30ai.How old when doctor first said you broke or fractured hip                      |
| 426                         | V00SPNFX   | Num  | 8   | YNDK.  | 3.       | SAQ:Q31.Doctor ever said you fractured spine or vertebrae                                |
| 427                         | V00SPNFXAG | Num  | 8   | 3.     | 3.       | SAQ:Q31a.How old when doctor first said you fractured spine or vertebrae                 |
| 428                         | V00FALL    | Num  | 8   | YNDK.  | 3.       | SAQ:Q32.Fallen and landed on floor or ground, past 12 months                             |
| 429                         | V00WMXAGE1 | Num  | 8   | YNDK.  | 2.       | SAQ:Q36.Maximum weight: 18-25 years old                                                  |
| 430                         | V00WMXAGE2 | Num  | 8   | YNDK.  | 2.       | SAQ:Q36.Maximum weight: 26-29 years old                                                  |
| 431                         | V00WMXAGE3 | Num  | 8   | YNDK.  | 2.       | SAQ:Q36.Maximum weight: 30-39 years old                                                  |
| 432                         | V00WMXAGE4 | Num  | 8   | YNDK.  | 2.       | SAQ:Q36.Maximum weight: 40-49 years old                                                  |
| 433                         | V00WMXAGE5 | Num  | 8   | YNDK.  | 2.       | SAQ:Q36.Maximum weight: 50-59 years old                                                  |
| 434                         | V00WMXAGE6 | Num  | 8   | YNDK.  | 2.       | SAQ:Q36.Maximum weight: 60-69 years old                                                  |
| 435                         | V00WMXAGE7 | Num  | 8   | YNDK.  | 2.       | SAQ:Q36.Maximum weight: 70 years or older                                                |
| 436                         | V00WMNAGE1 | Num  | 8   | YNDK.  | 2.       | SAQ:Q38.Minimum weight: 18-25 years old                                                  |
| 437                         | V00WMNAGE2 | Num  | 8   | YNDK.  | 2.       | SAQ:Q38.Minimum weight: 26-29 years old                                                  |
| 438                         | V00WMNAGE3 | Num  | 8   | YNDK.  | 2.       | SAQ:Q38.Minimum weight: 30-39 years old                                                  |
| 439                         | V00WMNAGE4 | Num  | 8   | YNDK.  | 2.       | SAQ:Q38.Minimum weight: 40-49 years old                                                  |
| 440                         | V00WMNAGE5 | Num  | 8   | YNDK.  | 2.       | SAQ:Q38.Minimum weight: 50-59 years old                                                  |
| 441                         | V00WMNAGE6 | Num  | 8   | YNDK.  | 2.       | SAQ:Q38.Minimum weight: 60-69 years old                                                  |
| 442                         | V00WMNAGE7 | Num  | 8   | YNDK.  | 2.       | SAQ:Q38.Minimum weight: 70 years or older                                                |
| 443                         | V00SMOKE   | Num  | 8   | YNDK.  | 3.       | SAQ:Q39.Have you smoked at least 100 cigarettes (5 packs) in entire life                 |
| 444                         | V00SMKAGE  | Num  | 8   | 3.     | 3.       | SAQ:Q39a.How old when first started smoking cigarettes fairly regularly                  |

## The CONTENTS Procedure

## Variables in Creation Order

| #   | Variable   | Type | Len | Format    | Informat | Label                                                                                                           |
|-----|------------|------|-----|-----------|----------|-----------------------------------------------------------------------------------------------------------------|
| 445 | V00SMKNEV  | Num  | 8   | YNDK.     | 3.       | SAQ:Q39a.Never smoked cigarettes regularly                                                                      |
| 446 | V00SMKAVE  | Num  | 8   | 3.        | 3.       | SAQ:Q39b.On average of entire time have smoked, how many cigarettes did usually smoke per day                   |
| 447 | V00SMKNOW  | Num  | 8   | YNDK.     | 3.       | SAQ:Q39c.Smoke cigarettes now                                                                                   |
| 448 | V00SMKAMT  | Num  | 8   | 3.        | 3.       | SAQ:Q39ci.About how many cigarettes smoke per day                                                               |
| 449 | V00SMKSTOP | Num  | 8   | 3.        | 3.       | SAQ:Q39cii.How old when stopped smoking                                                                         |
| 450 | V00PIPE    | Num  | 8   | YNDK.     | 3.       | SAQ:Q40.Ever smoked pipe, cigars or cigarillos                                                                  |
| 451 | V00PIPEAGE | Num  | 8   | 3.        | 3.       | SAQ:Q40a.How old when first started smoking pipe, cigars or cigarillos fairly regularly                         |
| 452 | V00PIPENEV | Num  | 8   | YNDK.     | 3.       | SAQ:Q40a.Never smoked pipes, cigars or cigarillos regularly                                                     |
| 453 | V00PIPENOW | Num  | 8   | YNDK.     | 3.       | SAQ:Q40b.Smoke pipe or cigar now                                                                                |
| 454 | V00PIPEAMT | Num  | 8   | 3.        | 3.       | SAQ:Q40bi.About how many pipes, cigars or cigarillos smoke per week                                             |
| 455 | V00PIPSTOP | Num  | 8   | 3.        | 3.       | SAQ:Q40bii.How old when stopped smoking pipe, cigars or cigarillos                                              |
| 456 | V00DRNKAMT | Num  | 8   | ALCOHOLA. | 3.       | SAQ:Q41.How many alcoholic drinks in typical week, past 12 months                                               |
| 457 | V00DRKMORE | Num  | 8   | YNDK.     | 3.       | SAQ:Q42.Ever drink more beer, wine or liquor than do now                                                        |
| 458 | V00CESD1   | Num  | 8   | TIME6AX.  | 3.       | SAQ:Q43a.CES- D: how often bothered by things that usually don't bother, past week                              |
| 459 | V00CESD2   | Num  | 8   | TIME6AX.  | 3.       | SAQ:Q43b.CES- D: how often did not feel like eating, appetite was poor, past week                               |
| 460 | V00CESD3   | Num  | 8   | TIME6AX.  | 3.       | SAQ:Q43c.CES- D: how often felt could not shake off the blues even with help from family and friends, past week |
| 461 | V00CESD4   | Num  | 8   | TIME6AX.  | 3.       | SAQ:Q43d.CES- D: how often felt just as good as other people, past week                                         |
| 462 | V00CESD5   | Num  | 8   | TIME6AX.  | 3.       | SAQ:Q43e.CES- D: how often had trouble keeping mind on what was doing, past week                                |
| 463 | V00CESD6   | Num  | 8   | TIME6AX.  | 3.       | SAQ:Q43f.CES- D: how often felt depressed, past week                                                            |
| 464 | V00CESD7   | Num  | 8   | TIME6AX.  | 3.       | SAQ:Q43g.CES- D: how often felt that everything did was an effort, past week                                    |
| 465 | V00CESD8   | Num  | 8   | TIME6AX.  | 3.       | SAQ:Q43h.CES- D: how often felt hopeful about the future, past week                                             |
| 466 | V00CESD9   | Num  | 8   | TIME6AX.  | 3.       | SAQ:Q43i.CES- D: how often thought my life had been a failure, past week                                        |

## The CONTENTS Procedure

## Variables in Creation Order

| #   | Variable   | Type | Len | Format   | Informat | Label                                                                                                                                              |
|-----|------------|------|-----|----------|----------|----------------------------------------------------------------------------------------------------------------------------------------------------|
| 467 | V00CESD10  | Num  | 8   | TIME6AX. | 3.       | SAQ:Q43j.CES- D: how often felt fearful, past week                                                                                                 |
| 468 | V00CESD11  | Num  | 8   | TIME6AX. | 3.       | SAQ:Q43k.CES- D: how often sleep was restless, past week                                                                                           |
| 469 | V00CESD12  | Num  | 8   | TIME6AX. | 3.       | SAQ:Q43l.CES- D: how often was happy, past week                                                                                                    |
| 470 | V00CESD13  | Num  | 8   | TIME6AX. | 3.       | SAQ:Q43m.CES- D: how often talked less than usual, past week                                                                                       |
| 471 | V00CESD14  | Num  | 8   | TIME6AX. | 3.       | SAQ:Q43n.CES- D: how often felt lonely, past week                                                                                                  |
| 472 | V00CESD15  | Num  | 8   | TIME6AX. | 3.       | SAQ:Q43o.CES- D: how often felt people were unfriendly, past week                                                                                  |
| 473 | V00CESD16  | Num  | 8   | TIME6AX. | 3.       | SAQ:Q43p.CES- D: how often enjoyed life, past week                                                                                                 |
| 474 | V00CESD17  | Num  | 8   | TIME6AX. | 3.       | SAQ:Q43q.CES- D: how often had crying spells, past week                                                                                            |
| 475 | V00CESD18  | Num  | 8   | TIME6AX. | 3.       | SAQ:Q43r.CES- D: how often felt sad, past week                                                                                                     |
| 476 | V00CESD19  | Num  | 8   | TIME6AX. | 3.       | SAQ:Q43s.CES- D: how often felt that people disliked me, past week                                                                                 |
| 477 | V00CESD20  | Num  | 8   | TIME6AX. | 3.       | SAQ:Q43t.CES- D: how often could not get going, past week                                                                                          |
| 478 | V00TYLEN   | Num  | 8   | YNDK.    | 3.       | EV:Q50a.Used Tylenol (Acetaminophen) for joint pain or arthritis more than half the days of the month, past 30 days                                |
| 479 | V00NSAIDS  | Num  | 8   | YNDK.    | 3.       | EV:Q50b.Used nonprescription NSAIDS (e.g., Aspirin, Ibuprofen).for joint pain or arthritis more than half the days of the month, past 30 days      |
| 480 | V00NSAIDRX | Num  | 8   | YNDK.    | 3.       | EV:Q50c.Used prescription NSAIDS (e.g., Ibuprofen, Diclofenac).for joint pain or arthritis more than half the days of the month, past 30 days      |
| 481 | V00COXIBS  | Num  | 8   | YNDK.    | 3.       | EV:Q50d.Used COXIBS (e.g., Bextra, Celebrex...) for joint pain or arthritis more than half the days of the month, past 30 days                     |
| 482 | V00NARCOT  | Num  | 8   | YNDK.    | 3.       | EV:Q50e.Used strong prescription pain medications (e.g., narcotics) for joint pain or arthritis more than half the days of the month, past 30 days |
| 483 | V00SAME    | Num  | 8   | YNDK.    | 3.       | EV:Q50f.Used SAME (S- adenosylmethionine) for joint pain or arthritis more than half the days of the month, past 30 days                           |
| 484 | V00MSM     | Num  | 8   | YNDK.    | 3.       | EV:Q50g.Used MSM (methylsulfonylmethane) for joint pain or arthritis more than half the days of the month, past 30 days                            |

## The CONTENTS Procedure

| Variables in Creation Order |            |      |     |           |          |                                                                                                                                                               |
|-----------------------------|------------|------|-----|-----------|----------|---------------------------------------------------------------------------------------------------------------------------------------------------------------|
| #                           | Variable   | Type | Len | Format    | Informat | Label                                                                                                                                                         |
| 485                         | V00DOXYCYC | Num  | 8   | YNDK.     | 3.       | EV:Q50h.Used Doxycycline (includes Vibra- Tabs, Doryx, Adoxa...) for joint pain or arthritis more than half the days of the month, past 30 days               |
| 486                         | V00PNMEDT  | Num  | 8   | YNDK.     | 3.       | EV:Q51.Take any pain medication today (include both prescription and over-the-counter medications for any type of pain)                                       |
| 487                         | V00CHON    | Num  | 8   | YNDK.     | 3.       | EV:Q52a.Used chondroitin sulfate for joint pain or arthritis, past 6 months                                                                                   |
| 488                         | V00GLUC    | Num  | 8   | YNDK.     | 3.       | EV:Q52b.Used glucosamine for joint pain or arthritis, past 6 months                                                                                           |
| 489                         | V00KNINJ   | Num  | 8   | YNDK.     | 3.       | EV:Q53.Either knee, injections for treatment of arthritis, past 6 months                                                                                      |
| 490                         | V00HYALKN  | Num  | 8   | LRB1X.    | 3.       | EV:Q53ai.Which knee, injection of hyaluronic acid, past 6 months                                                                                              |
| 491                         | V00STERKN  | Num  | 8   | LRB1X.    | 3.       | EV:Q53bi.Which knee, injection of steroids, past 6 months                                                                                                     |
| 492                         | V00TEST    | Num  | 8   | YNDK.     | 3.       | EV:Q54.Used male hormone or testosterone (injection, patch, or rubbed on skin) (men only), past 6 months                                                      |
| 493                         | V00TESTUSE | Num  | 8   | MEDDUR2X. | 3.       | EV:Q54a.Last time used male hormone or testosterone (men only), past 6 months                                                                                 |
| 494                         | V00ESTR    | Num  | 8   | YNDK.     | 3.       | EV:Q55.Used Estratest or Syntest, a combination of estrogen and testosterone, for menopausal symptoms or to increase bone density (women only), past 6 months |
| 495                         | V00ESTRUSE | Num  | 8   | MEDDUR2X. | 3.       | EV:Q55a.Last time used Estratest or Syntest (women only), past 6 months                                                                                       |
| 496                         | V00GNRH    | Num  | 8   | YNDK.     | 3.       | EV:Q56.Received GnRH antagonist injections (such as Antagon, Cetrotide, Lupron) to treat vaginal bleeding/ prostate cancer, past 6 months                     |
| 497                         | V00GNRHUSE | Num  | 8   | MEDDUR2X. | 3.       | EV:Q56a.Last time had GnRH antagonist injection, past 6 months                                                                                                |
| 498                         | V00PTH     | Num  | 8   | YNDK.     | 3.       | EV:Q57.Used parathyroid hormone or PTH (includes Forteo, or teriparatide, given by injection) to treat osteoporosis, past 6 months                            |
| 499                         | V00PTHUSE  | Num  | 8   | MEDDUR2X. | 3.       | EV:Q57a.Last time had parathyroid hormone or PTH injection, past 6 months                                                                                     |
| 500                         | V00BISPHOS | Num  | 8   | YNDK.     | 3.       | EV:Q58.Taken bisphosphonate medication (includes alendronate, risedronate...) to treat osteoporosis or Paget's disease, past 5 years                          |
| 501                         | V00BISPYRS | Num  | 8   | 3.        | 3.       | EV:Q58a.How many years take bisphosphonates                                                                                                                   |
| 502                         | V00BISPUSE | Num  | 8   | MEDDUR.   | 3.       | EV:Q58b.Last time took bisphosphonate, past 5 years                                                                                                           |

### The CONTENTS Procedure

#### Variables in Creation Order

| #   | Variable   | Type | Len | Format | Informat | Label                                                                                                                                                        |
|-----|------------|------|-----|--------|----------|--------------------------------------------------------------------------------------------------------------------------------------------------------------|
| 503 | V00CAM12   | Num  | 8   | YNDK.  | 3.       | EV:Q59.CAM: seen someone other than medical doctor or nurse, such as chiropractor or acupuncturist, specifically for arthritis or joint pain, past 12 months |
| 504 | V00ACUTNUM | Num  | 8   | CAM.   | 3.       | EV:Q59ai.CAM: how many times see acupuncture practitioner for arthritis or joint pain, past 12 months                                                        |
| 505 | V00ACUTCUR | Num  | 8   | YNDK.  | 3.       | EV:Q59aii.CAM: currently seeing acupuncture practitioner for arthritis or joint pain                                                                         |
| 506 | V00ACUSNUM | Num  | 8   | CAM.   | 3.       | EV:Q59bi.CAM: how many times see acupressure practitioner for arthritis or joint pain, past 12 months                                                        |
| 507 | V00ACUSCUR | Num  | 8   | YNDK.  | 3.       | EV:Q59bii.CAM: currently seeing acupressure practitioner for arthritis or joint pain                                                                         |
| 508 | V00CHELCUR | Num  | 8   | YNDK.  | 3.       | EV:Q59eii.CAM: currently seeing chelation therapy practitioner for arthritis or joint pain                                                                   |
| 509 | V00CHELNUM | Num  | 8   | CAM.   | 3.       | EV:Q59ei.CAM: how many times see chelation therapy practitioner for arthritis or joint pain, past 12 months                                                  |
| 510 | V00CHIRNUM | Num  | 8   | CAM.   | 3.       | EV:Q59fi.CAM: how many times see chiropractic care practitioner for arthritis or joint pain, past 12 months                                                  |
| 511 | V00CHIRCUR | Num  | 8   | YNDK.  | 3.       | EV:Q59fii.CAM: currently seeing chiropractic care practitioner for arthritis or joint pain                                                                   |
| 512 | V00FOLKNUM | Num  | 8   | CAM.   | 3.       | EV:Q59hi.CAM: how many times see folk medicine practitioner for arthritis or joint pain, past 12 months                                                      |
| 513 | V00FOLKCUR | Num  | 8   | YNDK.  | 3.       | EV:Q59hii.CAM: currently seeing folk medicine practitioner for arthritis or joint pain                                                                       |
| 514 | V00HOMENUM | Num  | 8   | CAM.   | 3.       | EV:Q59ii.CAM: how many times see homeopathy/ homeopathic treatment practitioner for arthritis or joint pain, past 12 months                                  |
| 515 | V00HOMECUR | Num  | 8   | YNDK.  | 3.       | EV:Q59iii.CAM: currently seeing homeopathy/ homeopathic treatment practitioner for arthritis or joint pain                                                   |
| 516 | V00MASSNUM | Num  | 8   | CAM.   | 3.       | EV:Q59ki.CAM: how many times see massage practitioner for arthritis or joint pain, past 12 months                                                            |
| 517 | V00MASSCUR | Num  | 8   | YNDK.  | 3.       | EV:Q59kii.CAM: currently seeing massage practitioner for arthritis or joint pain                                                                             |
| 518 | V00DIET12  | Num  | 8   | YNDK.  | 3.       | EV:Q60.CAM: follow special food plan or diet, such as a vegetarian or low-fat diet, for arthritis or joint pain, past 12 months                              |

## The CONTENTS Procedure

| Variables in Creation Order |            |      |     |        |          |                                                                                                                                                           |
|-----------------------------|------------|------|-----|--------|----------|-----------------------------------------------------------------------------------------------------------------------------------------------------------|
| #                           | Variable   | Type | Len | Format | Informat | Label                                                                                                                                                     |
| 519                         | V00VITM12  | Num  | 8   | YNDK.  | 3.       | EV:Q61.CAM: use vitamins or minerals, such as selenium or vitamin C or D, for arthritis or joint pain, past 12 months                                     |
| 520                         | V00HERB12  | Num  | 8   | YNDK.  | 3.       | EV:Q62.CAM: use herbs, such as echinacea, ginger or garlic, for arthritis or joint pain, past 12 months                                                   |
| 521                         | V00RUBS12  | Num  | 8   | YNDK.  | 3.       | EV:Q63.CAM: used rubs, lotions, liniments, creams or oils, such as tiger balm or horse liniment, for arthritis or joint pain, past 12 months              |
| 522                         | V00BRAC12  | Num  | 8   | YNDK.  | 3.       | EV:Q64.CAM: worn copper bracelets or used magnets for arthritis or joint pain, past 12 months                                                             |
| 523                         | V00YOGA12  | Num  | 8   | YNDK.  | 3.       | EV:Q65.CAM: do any health or special movement activity, such as Tai Chi, Yoga, Chi Gong or Pilates, for arthritis or joint pain, past 12 months           |
| 524                         | V00RELA12  | Num  | 8   | YNDK.  | 3.       | EV:Q66.CAM: do relaxation or mind-body activities, such as meditation, deep breathing or visualization, for arthritis or joint pain, past 12 months       |
| 525                         | V00SPIR12  | Num  | 8   | YNDK.  | 3.       | EV:Q67.CAM: do spiritual activities (e.g., prayer, laying on of hands, healing circles, or faith healing) for arthritis or joint pain, past 12 months     |
| 526                         | V00RX30    | Num  | 8   | MEDS.  | 2.       | EV:Q49.MIF: bring in or identify all prescription medications taken, past 30 days                                                                         |
| 527                         | V00RX30NUM | Num  | 8   | 3.     | 3.       | EV:Q49a.MIF: total number of medications recorded                                                                                                         |
| 528                         | P02KPMEDCV | Num  | 8   | YNDK.  |          | IEI:Q10a.Either knee, used medication for pain, aching or stiffness more than half the days of a month, past 12 months (calc, used for study eligibility) |
| 529                         | P02KRSCV   | Num  | 8   | SURG.  |          | IEI:Q12b.Which knee replaced during knee replacement surgery (calc)                                                                                       |
| 530                         | P01RAJSCV  | Num  | 8   | YNDK.  |          | SV:Q2a.RA Symptoms: have morning stiffness (in any joints lasting at least one hour) for more than six weeks (calc)                                       |
| 531                         | P01RATSTCV | Num  | 8   | RATST. |          | SV:Q8a.RA Symptoms: RA blood test results (calc)                                                                                                          |
| 532                         | P01OADEGCV | Num  | 8   | YNDK.  |          | SV:Q10a.Doctor said you had osteoarthritis/ degenerative arthritis in knee (calc)                                                                         |
| 533                         | P01OAHIPC  | Num  | 8   | YNDK.  |          | SV:Q10b.Doctor said you had osteoarthritis/ degenerative arthritis in hip (calc)                                                                          |
| 534                         | P01OAHNDCV | Num  | 8   | YNDK.  |          | SV:Q10c.Doctor said you had osteoarthritis/ degenerative arthritis in hand/ fingers (calc)                                                                |
| 535                         | P01OABCKCV | Num  | 8   | YNDK.  |          | SV:Q10d.Doctor said you had osteoarthritis/ degenerative arthritis in back/ neck (calc)                                                                   |

## The CONTENTS Procedure

| Variables in Creation Order |            |      |     |          |          |                                                                                                                                               |
|-----------------------------|------------|------|-----|----------|----------|-----------------------------------------------------------------------------------------------------------------------------------------------|
| #                           | Variable   | Type | Len | Format   | Informat | Label                                                                                                                                         |
| 536                         | P01OAOTHCV | Num  | 8   | YNDK.    |          | SV:Q10e.Doctor said you had osteoarthritis/ degenerative arthritis in some other joint (calc)                                                 |
| 537                         | P01GOUTCV  | Num  | 8   | YNDK.    |          | SV:Q10f.Doctor said you had gout (calc)                                                                                                       |
| 538                         | P01OTARTCV | Num  | 8   | YNDK.    |          | SV:Q10g.Doctor said you had some other type of arthritis (calc)                                                                               |
| 539                         | P01ARTDRCV | Num  | 8   | YNDK.    |          | SV:Q11a.Seeing doctor/ other professional for knee arthritis (calc)                                                                           |
| 540                         | P01KPMEDCV | Num  | 8   | YNDK.    |          | SV:Q21a.Either knee, used med for pain, aching or stiffness more than half the days of a month, past 12 mo (calc, used for study eligibility) |
| 541                         | P01OVNUMCV | Num  | 8   | LADDER.  |          | SV:Q2a.How many ovaries removed (calc)                                                                                                        |
| 542                         | V00COMORB  | Num  | 8   |          |          | SAQ:Comorbidity Score (calc)                                                                                                                  |
| 543                         | V00FALLCV  | Num  | 8   | RATE2XA. |          | SAQ:Q32a.How many times fallen, past 12 months (calc)                                                                                         |
| 544                         | V00HT25MM  | Num  | 8   |          |          | SAQ:Height at age 25, self-reported (mm) (calc)                                                                                               |
| 545                         | V00WT25KG  | Num  | 8   |          |          | SAQ:Weight at age 25, self-reported (kg) (calc)                                                                                               |
| 546                         | V00WTMAXKG | Num  | 8   |          |          | SAQ:Maximum adult weight, self-reported (kg) (calc)                                                                                           |
| 547                         | V00WTMINKG | Num  | 8   |          |          | SAQ:Minimum adult weight, self-reported (kg) (calc)                                                                                           |
| 548                         | V00SMOKER  | Num  | 8   | SMOKE.   |          | SAQ:Smoking status for cigarettes (calc)                                                                                                      |
| 549                         | V00SMKPKYR | Num  | 8   |          |          | SAQ:Pack- years of smoking cigarettes (calc)                                                                                                  |
| 550                         | V00PSMOKER | Num  | 8   | SMOKE.   |          | SAQ:Smoking status for pipe, cigars or cigarillos (calc)                                                                                      |
| 551                         | V00PSMKYR  | Num  | 8   |          |          | SAQ:Years of smoking pipe, cigars or cigarillos (calc)                                                                                        |
| 552                         | V00CESD    | Num  | 8   |          |          | SAQ:CES- D: Center for Epidemiologic Studies Depression Scale (CES- D) Score (calc)                                                           |
| 553                         | V00HYAINJR | Num  | 8   | INJECT.  |          | EV:Right knee hyaluronic acid injection, past 6 months (calc)                                                                                 |
| 554                         | V00HYAINJL | Num  | 8   | INJECT.  |          | EV:Left knee hyaluronic acid injection, past 6 months (calc)                                                                                  |
| 555                         | V00STRINJR | Num  | 8   | INJECT.  |          | EV:Right knee steroid injection, past 6 months (calc)                                                                                         |
| 556                         | V00STRINJL | Num  | 8   | INJECT.  |          | EV:Left knee steroid injection, past 6 months (calc)                                                                                          |
| 557                         | V00BISPTYP | Num  | 8   | BISTYP.  |          | EV:Type of bisphosphonate taken, past 5 years (calc)                                                                                          |
| 558                         | V00CHNFQCV | Num  | 8   | FREQ3X.  |          | EV:Q52ai.Chondroitin sulfate frequency of use, past 6 months (calc)                                                                           |
| 559                         | V00GLCFQCV | Num  | 8   | FREQ3X.  |          | EV:Q52bi.Glucosamine frequency of use, past 6 months (calc)                                                                                   |
| 560                         | V00HYINJCV | Num  | 8   | YNDK.    |          | EV:Q53a.Either knee, hyaluronic acid injection (Synvisc/ Hyalgan), past 6 months (calc)                                                       |

## The CONTENTS Procedure

| Variables in Creation Order |            |      |     |         |          |                                                                                                                     |
|-----------------------------|------------|------|-----|---------|----------|---------------------------------------------------------------------------------------------------------------------|
| #                           | Variable   | Type | Len | Format  | Informat | Label                                                                                                               |
| 561                         | V00STINJCV | Num  | 8   | YNDK.   |          | EV:Q53b.Either knee, steroid injection (cortisone/ corticosteroid), past 6 months (calc)                            |
| 562                         | V00ACUTCV  | Num  | 8   | YNDK.   |          | EV:Q59a.CAM: seen acupuncture practitioner for arthritis or joint pain, past 12 months (calc)                       |
| 563                         | V00ACUSCV  | Num  | 8   | YNDK.   |          | EV:Q59b.CAM: seen acupressure practitioner for arthritis or joint pain, past 12 months (calc)                       |
| 564                         | V00CHELCV  | Num  | 8   | YNDK.   |          | EV:Q59e.CAM: seen chelation therapy practitioner for arthritis or joint pain, past 12 months (calc)                 |
| 565                         | V00CHIRCV  | Num  | 8   | YNDK.   |          | EV:Q59f.CAM: seen chiropractic care practitioner for arthritis or joint pain, past 12 months (calc)                 |
| 566                         | V00FOLKCV  | Num  | 8   | YNDK.   |          | EV:Q59h.CAM: seen folk medicine practitioner for arthritis or joint pain, past 12 months (calc)                     |
| 567                         | V00HOMECV  | Num  | 8   | YNDK.   |          | EV:Q59i.CAM: seen homeopathy/ homeopathic treatment practitioner for arthritis or joint pain, past 12 months (calc) |
| 568                         | V00MASSCV  | Num  | 8   | YNDK.   |          | EV:Q59k.CAM: seen massage practitioner for arthritis or joint pain, past 12 months (calc)                           |
| 569                         | V00DIETCV  | Num  | 8   | YNDK.   |          | EV:Q60a.CAM: currently following special food plan or diet for arthritis or joint pain (calc)                       |
| 570                         | V00VITMCV  | Num  | 8   | YNDK.   |          | EV:Q61a.CAM: currently using vitamins/ minerals for arthritis or joint pain (calc)                                  |
| 571                         | V00RUBCV   | Num  | 8   | YNDK.   |          | EV:Q63a.CAM: currently using rubs, lotions, liniments, creams or oils for arthritis or joint pain (calc)            |
| 572                         | V00CAPSNCV | Num  | 8   | YNDK.   |          | EV:Q63b.CAM: currently using Capsaicin (pepper cream) for arthritis or joint pain (calc)                            |
| 573                         | V00BRACCV  | Num  | 8   | YNDK.   |          | EV:Q64a.CAM: currently wear copper bracelets or use magnets for arthritis or joint pain (calc)                      |
| 574                         | V00YOGACV  | Num  | 8   | YNDK.   |          | EV:Q65a.CAM: currently do any type of health or special movement activity for arthritis or joint pain (calc)        |
| 575                         | V00HERBCV  | Num  | 8   | YNDK.   |          | EV:Q62a.CAM: currently using any herbs for arthritis or joint pain (calc)                                           |
| 576                         | V00RELACV  | Num  | 8   | YNDK.   |          | EV:Q66a.CAM: currently do relaxation or mind- body activities for arthritis or joint pain (calc)                    |
| 577                         | V00SPIRCV  | Num  | 8   | YNDK.   |          | EV:Q67a.CAM: currently do any type of spiritual activities for arthritis or joint pain (calc)                       |
| 578                         | V00RXANALG | Num  | 8   | MED30D. |          | EV:MIF: Rx Analgesic use indicator (calc)                                                                           |
| 579                         | V00RXVLCXB | Num  | 8   | MED30D. |          | EV:MIF: Rx Valdecoxib use indicator (calc)                                                                          |
| 580                         | V00RXFLUOR | Num  | 8   | MED30D. |          | EV:MIF: Rx Fluoride use indicator (calc)                                                                            |
| 581                         | V00RXCLCTN | Num  | 8   | MED30D. |          | EV:MIF: Rx Calcitonin use indicator (calc)                                                                          |



## The CONTENTS Procedure

| Variables in Creation Order |            |      |     |          |          |                                                                                                        |
|-----------------------------|------------|------|-----|----------|----------|--------------------------------------------------------------------------------------------------------|
| #                           | Variable   | Type | Len | Format   | Informat | Label                                                                                                  |
| 582                         | V00RXBISPH | Num  | 8   | MED30D.  |          | EV:MIF: Rx Bisphosphonate use indicator (calc)                                                         |
| 583                         | P01RASTASV | Num  | 8   | RASTASV. |          | SV:RA/ other inflammatory arthritis diagnosis and medication status, self-report (calc)                |
| 584                         | V00RXIHYAL | Num  | 8   | MED30D.  |          | EV:MIF: Rx Injected hyaluronic acid use indicator (calc)                                               |
| 585                         | V00RXRFCXB | Num  | 8   | MED30D.  |          | EV:MIF: Rx Rofecoxib use indicator (calc)                                                              |
| 586                         | V00RXNARC  | Num  | 8   | MED30D.  |          | EV:MIF: Rx Narcotic analgesic use indicator (calc)                                                     |
| 587                         | V00RXISTRD | Num  | 8   | MED30D.  |          | EV:MIF: Rx Injected corticosteroid use indicator (calc)                                                |
| 588                         | V00RXCOX2  | Num  | 8   | MED30D.  |          | EV:MIF: Rx COX- II inhibitor use indicator (calc)                                                      |
| 589                         | V00RXCHOND | Num  | 8   | MED30D.  |          | EV:MIF: Rx Chondroitin sulfate use indicator (calc)                                                    |
| 590                         | V00RXOTHAN | Num  | 8   | MED30D.  |          | EV:MIF: Rx Other analgesic use indicator (calc)                                                        |
| 591                         | V00RXGLCSM | Num  | 8   | MED30D.  |          | EV:MIF: Rx Glucosamine use indicator (calc)                                                            |
| 592                         | V00RXACTM  | Num  | 8   | MED30D.  |          | EV:MIF: Rx Acetaminophen use indicator (calc)                                                          |
| 593                         | V00RXMSM   | Num  | 8   | MED30D.  |          | EV:MIF: Rx Methylsulfonylmethane use indicator (calc)                                                  |
| 594                         | P02KSURGCV | Num  | 8   | YNDK.    |          | IEI:Q12a.Either knee, ever had knee replacement surgery where all or part of joint was replaced (calc) |
| 595                         | V00RXNSAID | Num  | 8   | MED30D.  |          | EV:MIF: Rx NSAID use indicator (calc)                                                                  |
| 596                         | V00RXASPRN | Num  | 8   | MED30D.  |          | EV:MIF: Rx Aspirin use indicator (calc)                                                                |
| 597                         | V00RXNTRAT | Num  | 8   | MED30D.  |          | EV:MIF: Rx Nitrate use indicator (calc)                                                                |
| 598                         | V00RXRALOX | Num  | 8   | MED30D.  |          | EV:MIF: Rx Raloxifene use indicator (calc)                                                             |
| 599                         | V00RXVIT_D | Num  | 8   | MED30D.  |          | EV:MIF: Rx Vitamin D use indicator (calc)                                                              |
| 600                         | V00RXOSTRD | Num  | 8   | MED30D.  |          | EV:MIF: Rx Oral corticosteroid use indicator (calc)                                                    |
| 601                         | V00RXCLCXB | Num  | 8   | MED30D.  |          | EV:MIF: Rx Celecoxib use indicator (calc)                                                              |
| 602                         | V00RXTPRTD | Num  | 8   | MED30D.  |          | EV:MIF: Rx Teriparatide use indicator (calc)                                                           |
| 603                         | V00RXSALIC | Num  | 8   | MED30D.  |          | EV:MIF: Rx Salicylate use indicator (calc)                                                             |
| 604                         | V00RXSAME  | Num  | 8   | MED30D.  |          | EV:MIF: Rx S- adenosylmethionine use indicator (calc)                                                  |
| 605                         | P01RATOTCV | Num  | 8   | LADDER.  |          | SV:Q9.RA symptoms: total score for questions #2 through #8 (calc)                                      |
| 606                         | P02CNCOTH  | Num  | 8   | YNDK.    |          | IEI:Cancer type: colon, uterine and other, self-reported (calc)                                        |
| 607                         | P01RAWE6L  | Num  | 8   | YNDK.    |          | SV:RA symptoms: left wrist or elbow swelling, ever had lasting more than 6 weeks (calc)                |
| 608                         | P01HRSRFXO | Num  | 8   | YNDK.    |          | SV:Right hip replacement reason, hip fracture or other (calc)                                          |
| 609                         | P01HRSLFXO | Num  | 8   | YNDK.    |          | SV:Left hip replacement reason, hip fracture or other (calc)                                           |

## The CONTENTS Procedure

| Variables in Creation Order |            |      |     |         |          |                                                                                                                                           |
|-----------------------------|------------|------|-----|---------|----------|-------------------------------------------------------------------------------------------------------------------------------------------|
| #                           | Variable   | Type | Len | Format  | Informat | Label                                                                                                                                     |
| 610                         | P01RAWE6R  | Num  | 8   | YNDK.   |          | SV:RA symptoms: right wrist or elbow swelling, ever had lasting more than 6 weeks (calc)                                                  |
| 611                         | V00OTHCAMC | Num  | 8   | YNDK.   |          | EV:CAM: currently seeing ayurveda/ biofeedback/ energy healing/ hypnosis/ naturopathy practitioner for arthritis or joint pain (calc)     |
| 612                         | V00OTHCAM  | Num  | 8   | YNDK.   |          | EV:CAM: seen ayurveda/ biofeedback/ energy healing/ hypnosis/ naturopathy practitioner for arthritis or joint pain, past 12 months (calc) |
| 613                         | V00FFQ1    | Num  | 8   | FFQ1Z.  | 3.       | SAQ:Block Brief 2000: eggs (include egg biscuits/ Egg McMuffins (not egg substitutes)), eat how often, past 12 months                     |
| 614                         | V00FFQSZ1  | Num  | 8   | LADDER. | 3.       | SAQ:Block Brief 2000: eggs (not egg substitutes), how many each time                                                                      |
| 615                         | V00FFQ2    | Num  | 8   | FFQ1Z.  | 3.       | SAQ:Block Brief 2000: bacon/ breakfast sausage (including sausage biscuit), eat how often, past 12 months                                 |
| 616                         | V00FFQSZ2  | Num  | 8   | LADDER. | 3.       | SAQ:Block Brief 2000: bacon/ breakfast sausage, how many pieces each time                                                                 |
| 617                         | V00FFQ3    | Num  | 8   | FFQ1Z.  | 3.       | SAQ:Block Brief 2000: cooked cereals (e.g., oatmeal/ cream of wheat/ grits) eat how often, past 12 months                                 |
| 618                         | V00FFQSZ3  | Num  | 8   | FFQ2Z.  | 3.       | SAQ:Block Brief 2000: cooked cereals, which bowl each time                                                                                |
| 619                         | V00FFQ4    | Num  | 8   | FFQ1Z.  | 3.       | SAQ:Block Brief 2000: cold cereals (e.g., Corn Flakes/ Cheerios...), eat how often, past 12 months                                        |
| 620                         | V00FFQSZ4  | Num  | 8   | FFQ2Z.  | 3.       | SAQ:Block Brief 2000: cold cereals, which bowl each time                                                                                  |
| 621                         | V00FFQ5    | Num  | 8   | FFQ9Z.  | 3.       | SAQ:Block Brief 2000: cereal, which eat most often                                                                                        |
| 622                         | V00FFQ6    | Num  | 8   | FFQ1Z.  | 3.       | SAQ:Block Brief 2000: cheese/ sliced cheese/ cheese spread (including on sandwiches), eat how often, past 12 months                       |
| 623                         | V00FFQSZ6  | Num  | 8   | LADDER. | 3.       | SAQ:Block Brief 2000: cheese, how many slices each time                                                                                   |
| 624                         | V00FFQ7    | Num  | 8   | FFQ1Z.  | 3.       | SAQ:Block Brief 2000: yogurt (not frozen yogurt), eat how often, past 12 months                                                           |
| 625                         | V00FFQSZ7  | Num  | 8   | FFQ2Z.  | 3.       | SAQ:Block Brief 2000: yogurt (not frozen yogurt), how much each time                                                                      |
| 626                         | V00FFQ8    | Num  | 8   | FFQ1Z.  | 3.       | SAQ:Block Brief 2000: bananas, eat how often, past 12 months                                                                              |
| 627                         | V00FFQSZ8  | Num  | 8   | FFQ4Z.  | 3.       | SAQ:Block Brief 2000: bananas, how many each time                                                                                         |
| 628                         | V00FFQ9    | Num  | 8   | FFQ1Z.  | 3.       | SAQ:Block Brief 2000: apples/ pears, eat how often, past 12 months                                                                        |

## The CONTENTS Procedure

| Variables in Creation Order |            |      |     |        |          |                                                                                                                               |
|-----------------------------|------------|------|-----|--------|----------|-------------------------------------------------------------------------------------------------------------------------------|
| #                           | Variable   | Type | Len | Format | Informat | Label                                                                                                                         |
| 629                         | V00FFQSZ9  | Num  | 8   | FFQ4Z. | 3.       | SAQ:Block Brief 2000: apples/ pears, how many each time                                                                       |
| 630                         | V00FFQ10   | Num  | 8   | FFQ1Z. | 3.       | SAQ:Block Brief 2000: oranges/ tangerines (not including juice), eat how often, past 12 months                                |
| 631                         | V00FFQSZ10 | Num  | 8   | FFQ4Z. | 3.       | SAQ:Block Brief 2000: oranges/ tangerines, how many each time                                                                 |
| 632                         | V00FFQ11   | Num  | 8   | FFQ1Z. | 3.       | SAQ:Block Brief 2000: applesauce/ fruit cocktail/ any canned fruit, eat how often, past 12 months                             |
| 633                         | V00FFQSZ11 | Num  | 8   | FFQ2Z. | 3.       | SAQ:Block Brief 2000: applesauce/ fruit cocktail/ any canned fruit, how much each time                                        |
| 634                         | V00FFQ12   | Num  | 8   | FFQ1Z. | 3.       | SAQ:Block Brief 2000: any other fruit (e.g., grapes/ melon/ strawberries/ peaches), eat how often, past 12 months             |
| 635                         | V00FFQSZ12 | Num  | 8   | FFQ2Z. | 3.       | SAQ:Block Brief 2000: any other fruit, how much each time                                                                     |
| 636                         | V00FFQ13   | Num  | 8   | FFQ1Z. | 3.       | SAQ:Block Brief 2000: french fries/ fried potatoes/ hash browns, eat how often, past 12 months                                |
| 637                         | V00FFQSZ13 | Num  | 8   | FFQ2Z. | 3.       | SAQ:Block Brief 2000: french fries/ fried potatoes/ hash browns, how much each time                                           |
| 638                         | V00FFQ14   | Num  | 8   | FFQ1Z. | 3.       | SAQ:Block Brief 2000: white potatoes not fried (including boiled/ baked/ mashed/ potato salad), eat how often, past 12 months |
| 639                         | V00FFQSZ14 | Num  | 8   | FFQ2Z. | 3.       | SAQ:Block Brief 2000: white potatoes not fried, how much each time                                                            |
| 640                         | V00FFQ15   | Num  | 8   | FFQ1Z. | 3.       | SAQ:Block Brief 2000: sweet potatoes/ yams/ sweet potato pie, eat how often, past 12 months                                   |
| 641                         | V00FFQSZ15 | Num  | 8   | FFQ2Z. | 3.       | SAQ:Block Brief 2000: sweet potatoes/ yams/ sweet potato pie, how much each time                                              |
| 642                         | V00FFQ16   | Num  | 8   | FFQ1Z. | 3.       | SAQ:Block Brief 2000: rice/ dishes made with rice, eat how often, past 12 months                                              |
| 643                         | V00FFQSZ16 | Num  | 8   | FFQ2Z. | 3.       | SAQ:Block Brief 2000: rice/ dishes made with rice, how much each time                                                         |
| 644                         | V00FFQ17   | Num  | 8   | FFQ1Z. | 3.       | SAQ:Block Brief 2000: baked beans/ chili with beans/ pintos/ any other dried beans, eat how often, during past 12 months      |
| 645                         | V00FFQSZ17 | Num  | 8   | FFQ2Z. | 3.       | SAQ:Block Brief 2000: baked beans/ chili with beans/ pintos/ any other dried beans, how much each time                        |
| 646                         | V00FFQ18   | Num  | 8   | FFQ1Z. | 3.       | SAQ:Block Brief 2000: refried beans, eat how often, past 12 months                                                            |
| 647                         | V00FFQSZ18 | Num  | 8   | FFQ2Z. | 3.       | SAQ:Block Brief 2000: refried beans, how much each time                                                                       |

## The CONTENTS Procedure

| Variables in Creation Order |            |      |     |         |          |                                                                                                            |
|-----------------------------|------------|------|-----|---------|----------|------------------------------------------------------------------------------------------------------------|
| #                           | Variable   | Type | Len | Format  | Informat | Label                                                                                                      |
| 648                         | V00FFQ19   | Num  | 8   | FFQ1Z.  | 3.       | SAQ:Block Brief 2000: green beans/ green peas, eat how often, past 12 months                               |
| 649                         | V00FFQSZ19 | Num  | 8   | FFQ2Z.  | 3.       | SAQ:Block Brief 2000: green beans/ green peas, how much each time                                          |
| 650                         | V00FFQ20   | Num  | 8   | FFQ1Z.  | 3.       | SAQ:Block Brief 2000: broccoli, eat how often, past 12 months                                              |
| 651                         | V00FFQSZ20 | Num  | 8   | FFQ2Z.  | 3.       | SAQ:Block Brief 2000: broccoli, how much each time                                                         |
| 652                         | V00FFQ21   | Num  | 8   | FFQ1Z.  | 3.       | SAQ:Block Brief 2000: carrots/ stews or mixed vegetables containing carrots, eat how often, past 12 months |
| 653                         | V00FFQSZ21 | Num  | 8   | FFQ2Z.  | 3.       | SAQ:Block Brief 2000: carrots/ stews or mixed vegetables containing carrots, how much each time            |
| 654                         | V00FFQ22   | Num  | 8   | FFQ1Z.  | 3.       | SAQ:Block Brief 2000: spinach/ greens (e.g., collards), eat how often, past 12 months                      |
| 655                         | V00FFQSZ22 | Num  | 8   | FFQ2Z.  | 3.       | SAQ:Block Brief 2000: spinach/ greens, how much each time                                                  |
| 656                         | V00FFQ23   | Num  | 8   | FFQ1Z.  | 3.       | SAQ:Block Brief 2000: cole slaw/ cabbage, eat how often, past 12 months                                    |
| 657                         | V00FFQSZ23 | Num  | 8   | FFQ2Z.  | 3.       | SAQ:Block Brief 2000: cole slaw/ cabbage, how much each time                                               |
| 658                         | V00FFQ24   | Num  | 8   | FFQ1Z.  | 3.       | SAQ:Block Brief 2000: green salad, eat how often, past 12 months                                           |
| 659                         | V00FFQSZ24 | Num  | 8   | FFQ2Z.  | 3.       | SAQ:Block Brief 2000: green salad, how much each time                                                      |
| 660                         | V00FFQ25   | Num  | 8   | FFQ1Z.  | 3.       | SAQ:Block Brief 2000: raw tomatoes (including in salad), eat how often, past 12 months                     |
| 661                         | V00FFQSZ25 | Num  | 8   | FFQ0Z.  | 3.       | SAQ:Block Brief 2000: raw tomatoes, how much each time                                                     |
| 662                         | V00FFQ26   | Num  | 8   | FFQ1Z.  | 3.       | SAQ:Block Brief 2000: catsup/ salsa/ chile peppers, eat how often, past 12 months                          |
| 663                         | V00FFQSZ26 | Num  | 8   | LADDER. | 3.       | SAQ:Block Brief 2000: catsup/ salsa/ chile peppers, how many TBSP each time                                |
| 664                         | V00FFQ27   | Num  | 8   | FFQ1Z.  | 3.       | SAQ:Block Brief 2000: salad dressing/ mayonnaise (not lowfat), eat how often, past 12 months               |
| 665                         | V00FFQSZ27 | Num  | 8   | LADDER. | 3.       | SAQ:Block Brief 2000: salad dressing/ mayonnaise (not lowfat), how many TBSP each time                     |
| 666                         | V00FFQ28   | Num  | 8   | FFQ1Z.  | 3.       | SAQ:Block Brief 2000: any other vegetable (e.g., corn/ squash/ okra), eat how often, past 12 months        |
| 667                         | V00FFQSZ28 | Num  | 8   | FFQ2Z.  | 3.       | SAQ:Block Brief 2000: any other vegetable, how much each time                                              |

## The CONTENTS Procedure

| Variables in Creation Order |            |      |     |         |          |                                                                                                                                          |
|-----------------------------|------------|------|-----|---------|----------|------------------------------------------------------------------------------------------------------------------------------------------|
| #                           | Variable   | Type | Len | Format  | Informat | Label                                                                                                                                    |
| 668                         | V00FFQ29   | Num  | 8   | FFQ1Z.  | 3.       | SAQ:Block Brief 2000: vegetable soup/ vegetable beef, chicken vegetable or tomato soup, eat how often, past 12 months                    |
| 669                         | V00FFQSZ29 | Num  | 8   | FFQ2Z.  | 3.       | SAQ:Block Brief 2000: vegetable soups, which bowl each time                                                                              |
| 670                         | V00FFQ30   | Num  | 8   | YNDK.   | 3.       | SAQ:Block Brief 2000: chicken/ meat/ fish, ever eat                                                                                      |
| 671                         | V00FFQ31   | Num  | 8   | FFQ1Z.  | 3.       | SAQ:Block Brief 2000: hamburgers/ cheeseburgers/ meat loaf (at home or in restaurant), eat how often, past 12 months                     |
| 672                         | V00FFQSZ31 | Num  | 8   | FFQ3Z.  | 3.       | SAQ:Block Brief 2000: meat (hamburgers...), how much each time                                                                           |
| 673                         | V00FFQ32   | Num  | 8   | FFQ1Z.  | 3.       | SAQ:Block Brief 2000: tacos/ burritos/ enchiladas/ tamales, eat how often, past 12 months                                                |
| 674                         | V00FFQSZ32 | Num  | 8   | FFQ2Z.  | 3.       | SAQ:Block Brief 2000: tacos/ burritos/ enchiladas/ tamales, how much each time                                                           |
| 675                         | V00FFQ33   | Num  | 8   | FFQ1Z.  | 3.       | SAQ:Block Brief 2000: beef steaks/ roasts/ pot roast (including in frozen dinners/ sandwiches), eat how often, past 12 months            |
| 676                         | V00FFQSZ33 | Num  | 8   | FFQ2Z.  | 3.       | SAQ:Block Brief 2000: beef steaks/ roasts/ pot roast, how much each time                                                                 |
| 677                         | V00FFQ34   | Num  | 8   | FFQ1Z.  | 3.       | SAQ:Block Brief 2000: pork (including chops/ roasts)/ dinner ham, eat how much, past 12 months                                           |
| 678                         | V00FFQSZ34 | Num  | 8   | FFQ2Z.  | 3.       | SAQ:Block Brief 2000: pork/ dinner ham, how much each time                                                                               |
| 679                         | V00FFQ35   | Num  | 8   | FFQ10Z. | 3.       | SAQ:Block Brief 2000: beef/ pork, when eat do you...                                                                                     |
| 680                         | V00FFQ36   | Num  | 8   | FFQ1Z.  | 3.       | SAQ:Block Brief 2000: mixed dishes with meat or chicken (e.g., stew/ corned beef hash or in frozen meals), eat how often, past 12 months |
| 681                         | V00FFQSZ36 | Num  | 8   | FFQ2Z.  | 3.       | SAQ:Block Brief 2000: mixed dishes with meat or chicken, how much each time                                                              |
| 682                         | V00FFQ37   | Num  | 8   | FFQ1Z.  | 3.       | SAQ:Block Brief 2000: fried chicken, at home or in a restaurant, eat how often, past 12 months                                           |
| 683                         | V00FFQSZ37 | Num  | 8   | LADDER. | 3.       | SAQ:Block Brief 2000: fried chicken, number medium pieces each time                                                                      |
| 684                         | V00FFQ38   | Num  | 8   | FFQ1Z.  | 3.       | SAQ:Block Brief 2000: chicken/ turkey not fried (e.g., baked/ grilled/ on sandwiches), eat how often, past 12 months                     |
| 685                         | V00FFQSZ38 | Num  | 8   | FFQ2Z.  | 3.       | SAQ:Block Brief 2000: chicken/ turkey not fried, how much each time                                                                      |
| 686                         | V00FFQ39   | Num  | 8   | FFQ11Z. | 3.       | SAQ:Block Brief 2000: chicken, when eat do you...                                                                                        |

### The CONTENTS Procedure

| Variables in Creation Order |            |      |     |         |          |                                                                                                                         |
|-----------------------------|------------|------|-----|---------|----------|-------------------------------------------------------------------------------------------------------------------------|
| #                           | Variable   | Type | Len | Format  | Informat | Label                                                                                                                   |
| 687                         | V00FFQ40   | Num  | 8   | FFQ1Z.  | 3.       | SAQ:Block Brief 2000: fried fish/ fish sandwich at home or in a restaurant, eat how often, past 12 months               |
| 688                         | V00FFQSZ40 | Num  | 8   | FFQ2Z.  | 3.       | SAQ:Block Brief 2000: fried fish/ fish sandwich, how much each time                                                     |
| 689                         | V00FFQ41   | Num  | 8   | FFQ1Z.  | 3.       | SAQ:Block Brief 2000: any other fish/ shellfish not fried (including tuna), eat how often, past 12 months               |
| 690                         | V00FFQSZ41 | Num  | 8   | FFQ2Z.  | 3.       | SAQ:Block Brief 2000: any other fish/ shellfish not fried, how much each time                                           |
| 691                         | V00FFQ42   | Num  | 8   | FFQ1Z.  | 3.       | SAQ:Block Brief 2000: hot dogs/ sausage (e.g., Polish/ Italian/ Chorizo), eat how often, past 12 months                 |
| 692                         | V00FFQSZ42 | Num  | 8   | LADDER. | 3.       | SAQ:Block Brief 2000: hot dogs/ sausage, how many each time                                                             |
| 693                         | V00FFQ43   | Num  | 8   | FFQ1Z.  | 3.       | SAQ:Block Brief 2000: boloney (bologna)/ sliced ham/ turkey lunch meat/ other lunch meat, eat how often, past 12 months |
| 694                         | V00FFQSZ43 | Num  | 8   | LADDER. | 3.       | SAQ:Block Brief 2000: boloney/ sliced ham/ turkey lunch meat/ other lunch meat, how many slices each time               |
| 695                         | V00FFQ44   | Num  | 8   | FFQ12Z. | 3.       | SAQ:Block Brief 2000: lunch meats, when eat are they...                                                                 |
| 696                         | V00FFQ45   | Num  | 8   | FFQ1Z.  | 3.       | SAQ:Block Brief 2000: spaghetti/ lasagna/ other pasta with tomato sauce, eat how often, past 12 months                  |
| 697                         | V00FFQSZ45 | Num  | 8   | FFQ2Z.  | 3.       | SAQ:Block Brief 2000: spaghetti/ lasagna/ other pasta with tomato sauce, how much each time                             |
| 698                         | V00FFQ46   | Num  | 8   | FFQ1Z.  | 3.       | SAQ:Block Brief 2000: cheese dishes without tomato sauce (e.g., macaroni and cheese), eat how often, past 12 months     |
| 699                         | V00FFQSZ46 | Num  | 8   | FFQ2Z.  | 3.       | SAQ:Block Brief 2000: cheese dishes without tomato sauce, how much each time                                            |
| 700                         | V00FFQ47   | Num  | 8   | FFQ1Z.  | 3.       | SAQ:Block Brief 2000: pizza (including carry-out), eat how often, past 12 months                                        |
| 701                         | V00FFQSZ47 | Num  | 8   | LADDER. | 3.       | SAQ:Block Brief 2000: pizza, how many slices each time                                                                  |
| 702                         | V00FFQ48   | Num  | 8   | FFQ1Z.  | 3.       | SAQ:Block Brief 2000: biscuits/ muffins, eat how often, past 12 months                                                  |
| 703                         | V00FFQSZ48 | Num  | 8   | LADDER. | 3.       | SAQ:Block Brief 2000: biscuits/ muffins, how many each time                                                             |
| 704                         | V00FFQ49   | Num  | 8   | FFQ1Z.  | 3.       | SAQ:Block Brief 2000: rolls/ hamburger buns/ english muffins/ bagels, eat how often, past 12 months                     |
| 705                         | V00FFQSZ49 | Num  | 8   | FFQ4Z.  | 3.       | SAQ:Block Brief 2000: rolls/ hamburger buns/ english muffins/ bagels, how many each time                                |

## The CONTENTS Procedure

## Variables in Creation Order

| #   | Variable   | Type | Len | Format  | Informat | Label                                                                                                                |
|-----|------------|------|-----|---------|----------|----------------------------------------------------------------------------------------------------------------------|
| 706 | V00FFQ50   | Num  | 8   | FFQ1Z.  | 3.       | SAQ:Block Brief 2000: white bread/ toast (including French/ Italian or in sandwiches), eat how often, past 12 months |
| 707 | V00FFQSZ50 | Num  | 8   | LADDER. | 3.       | SAQ:Block Brief 2000: white bread/ toast, how many slices each time                                                  |
| 708 | V00FFQ51   | Num  | 8   | FFQ1Z.  | 3.       | SAQ:Block Brief 2000: dark bread (e.g., rye/ whole wheat, including in sandwiches), eat how often, past 12 months    |
| 709 | V00FFQSZ51 | Num  | 8   | LADDER. | 3.       | SAQ:Block Brief 2000: dark bread, how many slices each time                                                          |
| 710 | V00FFQ52   | Num  | 8   | FFQ1Z.  | 3.       | SAQ:Block Brief 2000: tortillas, eat how often, past 12 months                                                       |
| 711 | V00FFQSZ52 | Num  | 8   | LADDER. | 3.       | SAQ:Block Brief 2000: tortillas, how many each time                                                                  |
| 712 | V00FFQ53   | Num  | 8   | FFQ1Z.  | 3.       | SAQ:Block Brief 2000: margarine on bread/ potatoes/ vegetables, eat how often, past 12 months                        |
| 713 | V00FFQSZ53 | Num  | 8   | LADDER. | 3.       | SAQ:Block Brief 2000: margarine on bread/ potatoes/ vegetables, how many pats (tsp.) each time                       |
| 714 | V00FFQ54   | Num  | 8   | FFQ1Z.  | 3.       | SAQ:Block Brief 2000: butter on bread/ potatoes/ vegetables, eat how often, past 12 months                           |
| 715 | V00FFQSZ54 | Num  | 8   | LADDER. | 3.       | SAQ:Block Brief 2000: butter on bread/ potatoes/ vegetables, how many pats (tsp.) each time                          |
| 716 | V00FFQ55   | Num  | 8   | FFQ1Z.  | 3.       | SAQ:Block Brief 2000: peanuts/ peanut butter, eat how often, past 12 months                                          |
| 717 | V00FFQSZ55 | Num  | 8   | LADDER. | 3.       | SAQ:Block Brief 2000: peanuts/ peanut butter, how many TBSP each time                                                |
| 718 | V00FFQ56   | Num  | 8   | FFQ1Z.  | 3.       | SAQ:Block Brief 2000: snacks (e.g., potato chips/ corn chips/ popcorn/ pretzels), eat how often, past 12 months      |
| 719 | V00FFQSZ56 | Num  | 8   | FFQ2Z.  | 3.       | SAQ:Block Brief 2000: snacks (not pretzels), how much each time                                                      |
| 720 | V00FFQ57   | Num  | 8   | FFQ1Z.  | 3.       | SAQ:Block Brief 2000: doughnuts/ cake/ pastry/ pie, eat how often, past 12 months                                    |
| 721 | V00FFQSZ57 | Num  | 8   | LADDER. | 3.       | SAQ:Block Brief 2000: doughnuts/ cake/ pastry/ pie, how many pieces each time                                        |
| 722 | V00FFQ58   | Num  | 8   | FFQ1Z.  | 3.       | SAQ:Block Brief 2000: cookies (not lowfat), eat how often, past 12 months                                            |
| 723 | V00FFQSZ58 | Num  | 8   | FFQ5Z.  | 3.       | SAQ:Block Brief 2000: cookies (not lowfat), how many each time                                                       |

## The CONTENTS Procedure

| Variables in Creation Order |            |      |     |         |          |                                                                                                                                             |
|-----------------------------|------------|------|-----|---------|----------|---------------------------------------------------------------------------------------------------------------------------------------------|
| #                           | Variable   | Type | Len | Format  | Informat | Label                                                                                                                                       |
| 724                         | V00FFQ59   | Num  | 8   | FFQ1Z.  | 3.       | SAQ:Block Brief 2000: ice cream/ frozen yogurt/ ice cream bars, eat how often, past 12 months                                               |
| 725                         | V00FFQSZ59 | Num  | 8   | FFQ2Z.  | 3.       | SAQ:Block Brief 2000: ice cream/ frozen yogurt/ ice cream bars, how much each time                                                          |
| 726                         | V00FFQ60   | Num  | 8   | FFQ13Z. | 3.       | SAQ:Block Brief 2000: ice cream/ frozen yogurt, when eat is it...                                                                           |
| 727                         | V00FFQ61   | Num  | 8   | FFQ1Z.  | 3.       | SAQ:Block Brief 2000: chocolate candy/ candy bars, eat how often, past 12 months                                                            |
| 728                         | V00FFQSZ61 | Num  | 8   | FFQ6Z.  | 3.       | SAQ:Block Brief 2000: chocolate candy/ candy bars, how many bars each time                                                                  |
| 729                         | V00FFQ62   | Num  | 8   | FFQ1Z.  | 3.       | SAQ:Block Brief 2000: real orange or grapefruit juice/ Welch's grape juice/ Minutemaid juices/ Juicy Juice, drink how often, past 12 months |
| 730                         | V00FFQSZ62 | Num  | 8   | LADDER. | 3.       | SAQ:Block Brief 2000: real orange or grapefruit juice/ Welch's grape juice/ Minutemaid juices/ Juicy Juice, how many glasses each time      |
| 731                         | V00FFQ63   | Num  | 8   | FFQ1Z.  | 3.       | SAQ:Block Brief 2000: Hawaiian Punch/ Sunny Delight/ Hi- C/ Tang/ Ocean Spray juices, drink how often, past 12 months                       |
| 732                         | V00FFQSZ63 | Num  | 8   | LADDER. | 3.       | SAQ:Block Brief 2000: Hawaiian Punch/ Sunny Delight/ Hi- C/ Tang/ Ocean Spray juices, how many glasses each time                            |
| 733                         | V00FFQ64   | Num  | 8   | FFQ1Z.  | 3.       | SAQ:Block Brief 2000: Kool Aid/ Capri Sun/ Knudsen juices, drink how often, past 12 months                                                  |
| 734                         | V00FFQSZ64 | Num  | 8   | LADDER. | 3.       | SAQ:Block Brief 2000: Kool Aid/ Capri Sun/ Knudsen juices, how many glasses each time                                                       |
| 735                         | V00FFQ65   | Num  | 8   | FFQ1Z.  | 3.       | SAQ:Block Brief 2000: instant breakfast milkshakes, diet shakes, or liquid supplements, drink how often, past 12 months                     |
| 736                         | V00FFQSZ65 | Num  | 8   | LADDER. | 3.       | SAQ:Block Brief 2000: instant breakfast milkshakes, diet shakes, or liquid supplements, how many glasses or cans each time                  |
| 737                         | V00FFQ66   | Num  | 8   | FFQ1Z.  | 3.       | SAQ:Block Brief 2000: glasses of milk (any kind), drink how often, past 12 months                                                           |
| 738                         | V00FFQSZ66 | Num  | 8   | LADDER. | 3.       | SAQ:Block Brief 2000: milk (any kind), how many glasses each time                                                                           |
| 739                         | V00FFQ67   | Num  | 8   | FFQ15Z. | 3.       | SAQ:Block Brief 2000: glasses of milk, when drink what kind usually drink                                                                   |
| 740                         | V00FFQ68   | Num  | 8   | FFQ1Z.  | 3.       | SAQ:Block Brief 2000: cream/ half and half/ non-dairy creamer in coffee or tea, drink how often, past 12 months                             |
| 741                         | V00FFQSZ68 | Num  | 8   | FFQ7Z.  | 3.       | SAQ:Block Brief 2000: cream/ half and half/ non-dairy creamer in coffee or tea, total TBSP on those days                                    |



## The CONTENTS Procedure

| Variables in Creation Order |            |      |     |          |          |                                                                                                                           |
|-----------------------------|------------|------|-----|----------|----------|---------------------------------------------------------------------------------------------------------------------------|
| #                           | Variable   | Type | Len | Format   | Informat | Label                                                                                                                     |
| 742                         | V00FFQ69   | Num  | 8   | FFQ1Z.   | 3.       | SAQ:Block Brief 2000: regular soft drinks/ bottled drinks like Snapple (not diet drinks), drink how often, past 12 months |
| 743                         | V00FFQSZ69 | Num  | 8   | FFQ7Z.   | 3.       | SAQ:Block Brief 2000: regular soft drinks/ bottled drinks (not diet drinks), how many bottles or cans each time           |
| 744                         | V00FFQ70   | Num  | 8   | FFQ1Z.   | 3.       | SAQ:Block Brief 2000: beer, drink how often, past 12 months                                                               |
| 745                         | V00FFQSZ70 | Num  | 8   | FFQ7Z.   | 3.       | SAQ:Block Brief 2000: beer, how many bottles or cans each time                                                            |
| 746                         | V00FFQ71   | Num  | 8   | FFQ1Z.   | 3.       | SAQ:Block Brief 2000: wine/ wine coolers, drink how often, past 12 months                                                 |
| 747                         | V00FFQ72   | Num  | 8   | FFQ1Z.   | 3.       | SAQ:Block Brief 2000: liquor/ mixed drinks, drink how often, past 12 months                                               |
| 748                         | V00FFQ73   | Num  | 8   | YNDKREG. | 3.       | SAQ:Block Brief 2000: vitamins/ minerals, taken regularly (at least once per month), past 12 months                       |
| 749                         | V00FFQYR74 | Num  | 8   | FFQ8Z.   | 3.       | SAQ:Block Brief 2000: regular Once- A- Day/ Centrum/ Thera type multivitamins, how many years                             |
| 750                         | V00FFQYR75 | Num  | 8   | FFQ8Z.   | 3.       | SAQ:Block Brief 2000: Stress- tabs/ B- Complex type multivitamins, how many years                                         |
| 751                         | V00FFQYR76 | Num  | 8   | FFQ8Z.   | 3.       | SAQ:Block Brief 2000: Antioxidant combination type multivitamins, how many years                                          |
| 752                         | V00FFQYR77 | Num  | 8   | FFQ8Z.   | 3.       | SAQ:Block Brief 2000: Vitamin A (not beta- carotene) single vitamins, how many years                                      |
| 753                         | V00FFQYR78 | Num  | 8   | FFQ8Z.   | 3.       | SAQ:Block Brief 2000: Beta- carotene single vitamin, how many years                                                       |
| 754                         | V00FFQYR79 | Num  | 8   | FFQ8Z.   | 3.       | SAQ:Block Brief 2000: Vitamin C single vitamin, how many years                                                            |
| 755                         | V00FFQYR80 | Num  | 8   | FFQ8Z.   | 3.       | SAQ:Block Brief 2000: Vitamin E single vitamin, how many years                                                            |
| 756                         | V00FFQYR81 | Num  | 8   | FFQ8Z.   | 3.       | SAQ:Block Brief 2000: Folic acid, folate single vitamin, how many years                                                   |
| 757                         | V00FFQYR82 | Num  | 8   | FFQ8Z.   | 3.       | SAQ:Block Brief 2000: Calcium/ Tums (alone or combined with Vitamin D or magnesium), how many years                       |
| 758                         | V00FFQYR83 | Num  | 8   | FFQ8Z.   | 3.       | SAQ:Block Brief 2000: Zinc alone, how many years                                                                          |
| 759                         | V00FFQYR84 | Num  | 8   | FFQ8Z.   | 3.       | SAQ:Block Brief 2000: Iron alone, how many years                                                                          |
| 760                         | V00FFQYR85 | Num  | 8   | FFQ8Z.   | 3.       | SAQ:Block Brief 2000: Selenium alone, how many years                                                                      |
| 761                         | V00FFQYR86 | Num  | 8   | FFQ8Z.   | 3.       | SAQ:Block Brief 2000: Vitamin D, alone or with calcium, how many years                                                    |

## The CONTENTS Procedure

| Variables in Creation Order |          |      |     |         |          |                                                                                                         |
|-----------------------------|----------|------|-----|---------|----------|---------------------------------------------------------------------------------------------------------|
| #                           | Variable | Type | Len | Format  | Informat | Label                                                                                                   |
| 762                         | V00FFQ87 | Num  | 8   | VIT1Z.  | 3.       | SAQ:Block Brief 2000: Vitamin C, if took how many milligrams usually take on days taken, past 12 months |
| 763                         | V00FFQ88 | Num  | 8   | VIT2Z.  | 3.       | SAQ:Vitamin D, if took how many IUs usually take on days taken, past 12 months                          |
| 764                         | V00FFQ89 | Num  | 8   | VIT2Z.  | 3.       | SAQ:Block Brief 2000: Vitamin E, if took how many IUs usually take on days taken, past 12 months        |
| 765                         | V00VIT1  | Num  | 8   | YNDK.   | 3.       | SAQ:Regular Once- A- Day/ Centrum/ Thera type multiple vitamins, taken past 30 days                     |
| 766                         | V00VIT2  | Num  | 8   | YNDK.   | 3.       | SAQ:Stress- tabs/ B- Complex type multiple vitamins, taken past 30 days                                 |
| 767                         | V00VIT3  | Num  | 8   | YNDK.   | 3.       | SAQ:Antioxidant combination type multiple vitamins, taken past 30 days                                  |
| 768                         | V00VIT4  | Num  | 8   | YNDK.   | 3.       | SAQ:Vitamin A (not beta- carotene) single vitamin, taken past 30 days                                   |
| 769                         | V00VIT5  | Num  | 8   | YNDK.   | 3.       | SAQ:Beta- carotene single vitamin, taken past 30 days                                                   |
| 770                         | V00VIT6  | Num  | 8   | YNDK.   | 3.       | SAQ:Vitamin C single vitamin, taken past 30 days                                                        |
| 771                         | V00VIT7  | Num  | 8   | YNDK.   | 3.       | SAQ:Vitamin E single vitamin, taken past 30 days                                                        |
| 772                         | V00VIT8  | Num  | 8   | YNDK.   | 3.       | SAQ:Folic acid, folate single vitamin, taken past 30 days                                               |
| 773                         | V00VIT9  | Num  | 8   | YNDK.   | 3.       | SAQ:Calcium or Tums (alone or combined with vitamin D or magnesium), taken past 30 days                 |
| 774                         | V00VIT10 | Num  | 8   | YNDK.   | 3.       | SAQ:Zinc alone, taken past 30 days                                                                      |
| 775                         | V00VIT11 | Num  | 8   | YNDK.   | 3.       | SAQ:Iron alone, taken past 30 days                                                                      |
| 776                         | V00VIT12 | Num  | 8   | YNDK.   | 3.       | SAQ:Selenium alone, taken past 30 days                                                                  |
| 777                         | V00VIT13 | Num  | 8   | YNDK.   | 3.       | SAQ:Vitamin D (alone or combined with calcium), taken past 30 days                                      |
| 778                         | V00FFQ90 | Num  | 8   | FFQ14Z. | 2.       | SAQ:Block Brief 2000: fat or oil, how often use in cooking                                              |
| 779                         | V00FFQ91 | Num  | 8   | YNDK.   | 2.       | SAQ:Block Brief 2000: fat or oil usually use in cooking, PAM                                            |
| 780                         | V00FFQ92 | Num  | 8   | YNDK.   | 2.       | SAQ:Block Brief 2000: fat or oil usually use in cooking, stick margarine                                |
| 781                         | V00FFQ93 | Num  | 8   | YNDK.   | 2.       | SAQ:Block Brief 2000: fat or oil usually use in cooking, soft tub margarine                             |
| 782                         | V00FFQ94 | Num  | 8   | YNDK.   | 2.       | SAQ:Block Brief 2000: fat or oil usually use in cooking, butter                                         |
| 783                         | V00FFQ95 | Num  | 8   | YNDK.   | 2.       | SAQ:Block Brief 2000: fat or oil usually use in cooking, butter/ margarine blend                        |
| 784                         | V00FFQ96 | Num  | 8   | YNDK.   | 2.       | SAQ:Block Brief 2000: fat or oil usually use in cooking, low- fat margarine                             |

## The CONTENTS Procedure

| Variables in Creation Order |            |      |     |         |          |                                                                                                                      |
|-----------------------------|------------|------|-----|---------|----------|----------------------------------------------------------------------------------------------------------------------|
| #                           | Variable   | Type | Len | Format  | Informat | Label                                                                                                                |
| 785                         | V00FFQ97   | Num  | 8   | YNDK.   | 2.       | SAQ:Block Brief 2000: fat or oil usually use in cooking, corn oil/ vegetable oil                                     |
| 786                         | V00FFQ98   | Num  | 8   | YNDK.   | 2.       | SAQ:Block Brief 2000: fat or oil usually use in cooking, olive oil/ canola oil                                       |
| 787                         | V00FFQ99   | Num  | 8   | YNDK.   | 2.       | SAQ:Block Brief 2000: fat or oil usually use in cooking, lard/ fatback/ bacon fat                                    |
| 788                         | V00FFQ100  | Num  | 8   | YNDK.   | 2.       | SAQ:Block Brief 2000: fat or oil usually use in cooking, Crisco                                                      |
| 789                         | V00FFQ101  | Num  | 8   | YNDK.   | 3.       | SAQ:Block Brief 2000: fat or oil usually use in cooking, don't know                                                  |
| 790                         | V00FFQ102  | Num  | 8   | YNDK.   | 2.       | SAQ:Block Brief 2000: do not use fat or oil in cooking                                                               |
| 791                         | V00MVIT1CV | Num  | 8   | FFQ16X. |          | SAQ:Block Brief 2000: Regular Once- A- Day, Centrum or Thera type multivitamins, how often past 12 months (calc)     |
| 792                         | V00STRTBCV | Num  | 8   | FFQ16X. |          | SAQ:Block Brief 2000: Stress- tabs or B- Complex type multivitamins, how often past 12 months (calc)                 |
| 793                         | V00ANTOXC  | Num  | 8   | FFQ16X. |          | SAQ:Block Brief 2000: Antioxidant combination type multivitamins, how often past 12 months (calc)                    |
| 794                         | V00VITACV  | Num  | 8   | FFQ16X. |          | SAQ:Block Brief 2000: Vitamin A (not beta- carotene) single vitamin, how often past 12 months (calc)                 |
| 795                         | V00BCARCV  | Num  | 8   | FFQ16X. |          | SAQ:Block Brief 2000: Beta- carotene single vitamin, how often past 12 months (calc)                                 |
| 796                         | V00VITECV  | Num  | 8   | FFQ16X. |          | SAQ:Block Brief 2000: Vitamin E single vitamin, how often past 12 months (calc)                                      |
| 797                         | V00FOLATCV | Num  | 8   | FFQ16X. |          | SAQ:Block Brief 2000: Folic acid, folate single vitamin, how often past 12 months (calc)                             |
| 798                         | V00CALCMCV | Num  | 8   | FFQ16X. |          | SAQ:Block Brief 2000: Calcium/ Tums (alone or combined with Vitamin D or magnesium), how often past 12 months (calc) |
| 799                         | V00ZINCCV  | Num  | 8   | FFQ16X. |          | SAQ:Block Brief 2000: Zinc alone, how often past 12 months (calc)                                                    |
| 800                         | V00IRONCV  | Num  | 8   | FFQ16X. |          | SAQ:Block Brief 2000: Iron alone, how often past 12 months (calc)                                                    |
| 801                         | V00SLNMCV  | Num  | 8   | FFQ16X. |          | SAQ:Block Brief 2000: Selenium alone, how often past 12 months (calc)                                                |
| 802                         | V00VITDCV  | Num  | 8   | FFQ16X. |          | SAQ:Block Brief 2000: Vitamin D, alone or with calcium, how often past 12 months (calc)                              |
| 803                         | V00VITCCV  | Num  | 8   | FFQ16X. |          | SAQ:Block Brief 2000: Vitamin C single vitamin, how often past 12 months (calc)                                      |
| 804                         | V00DTDFIB  | Num  | 8   |         |          | SAQ:Block Brief 2000: daily nutrients from food, total dietary fiber (g) (calc)                                      |

## The CONTENTS Procedure

| Variables in Creation Order |            |      |     |        |          |                                                                                                 |
|-----------------------------|------------|------|-----|--------|----------|-------------------------------------------------------------------------------------------------|
| #                           | Variable   | Type | Len | Format | Informat | Label                                                                                           |
| 805                         | V00SUPVITD | Num  | 8   |        |          | SAQ:Block Brief 2000: average daily nutrients from vitamin supplements, vitamin D (IU) (calc)   |
| 806                         | V00FIBVGFR | Num  | 8   |        |          | SAQ:Block Brief 2000: daily dietary fiber from vegetables and fruits (g) (calc)                 |
| 807                         | V00SUPB12  | Num  | 8   |        |          | SAQ:Block Brief 2000: average daily nutrients from vitamin supplements, B12 (ug) (calc)         |
| 808                         | V00DTCAFFN | Num  | 8   |        |          | SAQ:Block Brief 2000: daily nutrients from food, caffeine (mg) (calc)                           |
| 809                         | V00SRVFAT  | Num  | 8   |        |          | SAQ:Block Brief 2000: daily servings of fats, oils, sweets and sodas (calc)                     |
| 810                         | V00DTAIU   | Num  | 8   |        |          | SAQ:Block Brief 2000: daily nutrients from food, vitamin A (IU) (calc)                          |
| 811                         | V00DTCHOL  | Num  | 8   |        |          | SAQ:Block Brief 2000: daily nutrients from food, cholesterol (mg) (calc)                        |
| 812                         | V00PCTCOL1 | Num  | 8   |        |          | SAQ:Block Brief 2000: error flag, percent of foods marked as never (calc)                       |
| 813                         | V00DTPHOS  | Num  | 8   |        |          | SAQ:Block Brief 2000: daily nutrients from food, phosphorus (mg) (calc)                         |
| 814                         | V00DTVITC  | Num  | 8   |        |          | SAQ:Block Brief 2000: daily nutrients from food, vitamin C (mg) (calc)                          |
| 815                         | V00DTB1    | Num  | 8   |        |          | SAQ:Block Brief 2000: daily nutrients from food, thiamin (B1) (mg) (calc)                       |
| 816                         | V00PCTXLS  | Num  | 8   |        |          | SAQ:Block Brief 2000: error flag, percent of foods marked as extra large portion (calc)         |
| 817                         | V00SUPB2   | Num  | 8   |        |          | SAQ:Block Brief 2000: average daily nutrients from vitamin supplements, B2 (mg) (calc)          |
| 818                         | V00PCTCOL9 | Num  | 8   |        |          | SAQ:Block Brief 2000: error flag, percent of foods marked as every day (calc)                   |
| 819                         | V00DTVITK  | Num  | 8   |        |          | SAQ:Block Brief 2000: daily nutrients from food, vitamin K (ug) (calc)                          |
| 820                         | V00DTRET   | Num  | 8   |        |          | SAQ:Block Brief 2000: daily nutrients from food, retinol (preformed Vit. A, ug) (calc)          |
| 821                         | V00SUPVITE | Num  | 8   |        |          | SAQ:Block Brief 2000: average daily nutrients from vitamin supplements, vitamin E (a-TE) (calc) |
| 822                         | V00SUPNIAC | Num  | 8   |        |          | SAQ:Block Brief 2000: average daily nutrients from vitamin supplements, niacin (mg) (calc)      |
| 823                         | V00DTANZN  | Num  | 8   |        |          | SAQ:Block Brief 2000: daily nutrients from food, zinc from animal sources (mg) (calc)           |
| 824                         | V00DTLUT   | Num  | 8   |        |          | SAQ:Block Brief 2000: daily nutrients from food, lutein (carotenoid) (ug) (calc)                |

## The CONTENTS Procedure

| Variables in Creation Order |            |      |     |        |          |                                                                                                                          |
|-----------------------------|------------|------|-----|--------|----------|--------------------------------------------------------------------------------------------------------------------------|
| #                           | Variable   | Type | Len | Format | Informat | Label                                                                                                                    |
| 825                         | V00BAPFAT  | Num  | 8   |        |          | SAQ:Block Brief 2000: daily % of calories from fat, alcoholic beverages excluded from denominator (kcal) (calc)          |
| 826                         | V00PCTCARB | Num  | 8   |        |          | SAQ:Block Brief 2000: daily percent of calories from carbohydrate (kcal) (calc)                                          |
| 827                         | V00PCTSWT  | Num  | 8   |        |          | SAQ:Block Brief 2000: daily percent of calories from sweets, desserts (kcal) (calc)                                      |
| 828                         | V00DTACAR  | Num  | 8   |        |          | SAQ:Block Brief 2000: daily nutrients from food, alpha- carotene (ug) (calc)                                             |
| 829                         | V00SUPCA   | Num  | 8   |        |          | SAQ:Block Brief 2000: average daily nutrients from vitamin supplements, calcium (mg) (calc)                              |
| 830                         | V00SRVGRN  | Num  | 8   |        |          | SAQ:Block Brief 2000: daily servings of bread, cereals, rice and pasta (calc)                                            |
| 831                         | V00SRVFRT  | Num  | 8   |        |          | SAQ:Block Brief 2000: daily servings of fruits and fruit juices (calc)                                                   |
| 832                         | V00SUPFOL  | Num  | 8   |        |          | SAQ:Block Brief 2000: average daily nutrients from vitamin supplements, folate (mcg) (calc)                              |
| 833                         | V00DTBCAR  | Num  | 8   |        |          | SAQ:Block Brief 2000: daily nutrients from food, beta- carotene (ug) (calc)                                              |
| 834                         | V00DTPROT  | Num  | 8   |        |          | SAQ:Block Brief 2000: daily nutrients from food, protein (g) (calc)                                                      |
| 835                         | V00NWARNS  | Num  | 8   |        |          | SAQ:Block Brief 2000: error flag, how many warnings were applied (calc)                                                  |
| 836                         | V00DTPOTA  | Num  | 8   |        |          | SAQ:Block Brief 2000: daily nutrients from food, potassium (mg) (calc)                                                   |
| 837                         | V00DTSFAT  | Num  | 8   |        |          | SAQ:Block Brief 2000: daily nutrients from food, saturated fat (g) (calc)                                                |
| 838                         | V00SUPVITC | Num  | 8   |        |          | SAQ:Block Brief 2000: average daily nutrients supplements, vitamin C (mg) (calc)                                         |
| 839                         | V00DTOLEC  | Num  | 8   |        |          | SAQ:Block Brief 2000: daily nutrients from food, monounsaturated fat (g) (calc)                                          |
| 840                         | V00SUPBCAR | Num  | 8   |        |          | SAQ:Block Brief 2000: average daily nutrients from vitamin supplements, beta- carotene (ug) (calc)                       |
| 841                         | V00DTKCAL  | Num  | 8   |        |          | SAQ:Block Brief 2000: daily nutrients from food, calories (Kcal) (calc)                                                  |
| 842                         | V00BAPPROT | Num  | 8   |        |          | SAQ:Block Brief 2000: daily % of calories from protein, alcoholic beverages excluded from denominator (kcal) (calc)      |
| 843                         | V00BAPCARB | Num  | 8   |        |          | SAQ:Block Brief 2000: daily % of calories from carbohydrate, alcoholic beverages excluded from denominator (kcal) (calc) |
| 844                         | V00SUPVITA | Num  | 8   |        |          | SAQ:Block Brief 2000: average daily nutrients from vitamin supplements, vitamin A (IU) (calc)                            |

## The CONTENTS Procedure

## Variables in Creation Order

| #   | Variable   | Type | Len | Format | Informat | Label                                                                                         |
|-----|------------|------|-----|--------|----------|-----------------------------------------------------------------------------------------------|
| 845 | V00SUPB6   | Num  | 8   |        |          | SAQ:Block Brief 2000: average daily nutrients from vitamin supplements, B6 (mg) (calc)        |
| 846 | V00NFDSDAY | Num  | 8   |        |          | SAQ:Block Brief 2000: error flag, number of solid foods consumed per day (calc)               |
| 847 | V00DTNIAC  | Num  | 8   |        |          | SAQ:Block Brief 2000: daily nutrients from food, niacin (mg) (calc)                           |
| 848 | V00FIBBEAN | Num  | 8   |        |          | SAQ:Block Brief 2000: daily dietary fiber from beans (g) (calc)                               |
| 849 | V00DTNA    | Num  | 8   |        |          | SAQ:Block Brief 2000: daily nutrients from food, sodium (mg) (calc)                           |
| 850 | V00DTARE   | Num  | 8   |        |          | SAQ:Block Brief 2000: daily nutrients from food, vitamin A (RE) (calc)                        |
| 851 | V00DTLYC   | Num  | 8   |        |          | SAQ:Block Brief 2000: daily nutrients from food, lycopene (carotenoid) (ug) (calc)            |
| 852 | V00DTFAT   | Num  | 8   |        |          | SAQ:Block Brief 2000: daily nutrients from food, total fat (g) (calc)                         |
| 853 | V00PCTSMAL | Num  | 8   |        |          | SAQ:Block Brief 2000: error flag, percent of foods marked as small portion (calc)             |
| 854 | V00SUPFE   | Num  | 8   |        |          | SAQ:Block Brief 2000: average daily nutrients from vitamin supplements, iron (mg) (calc)      |
| 855 | V00SUPCU   | Num  | 8   |        |          | SAQ:Block Brief 2000: average daily nutrients from vitamin supplements, copper (mg) (calc)    |
| 856 | V00DTB12   | Num  | 8   |        |          | SAQ:Block Brief 2000: daily nutrients from food, vitamin B12 (ug) (calc)                      |
| 857 | V00DTGEN   | Num  | 8   |        |          | SAQ:Block Brief 2000: daily nutrients from food, genistein (ug) (calc)                        |
| 858 | V00DTMETH  | Num  | 8   |        |          | SAQ:Block Brief 2000: daily nutrients from food, methionine (mg) (calc)                       |
| 859 | V00SUPZINC | Num  | 8   |        |          | SAQ:Block Brief 2000: average daily nutrients from vitamin supplements, zinc (mg) (calc)      |
| 860 | V00SRVVEG  | Num  | 8   |        |          | SAQ:Block Brief 2000: daily servings of vegetables (calc)                                     |
| 861 | V00DTCALC  | Num  | 8   |        |          | SAQ:Block Brief 2000: daily nutrients from food, calcium (mg) (calc)                          |
| 862 | V00SUPMG   | Num  | 8   |        |          | SAQ:Block Brief 2000: average daily nutrients from vitamin supplements, magnesium (mg) (calc) |
| 863 | V00DTDAID  | Num  | 8   |        |          | SAQ:Block Brief 2000: daily nutrients from food, daidzein (ug) (calc)                         |
| 864 | V00SRVMEAT | Num  | 8   |        |          | SAQ:Block Brief 2000: daily servings of meat, fish, poultry, beans and eggs (calc)            |
| 865 | V00DTFE    | Num  | 8   |        |          | SAQ:Block Brief 2000: daily nutrients from food, iron (mg) (calc)                             |

## The CONTENTS Procedure

## Variables in Creation Order

| #   | Variable   | Type | Len | Format | Informat | Label                                                                                           |
|-----|------------|------|-----|--------|----------|-------------------------------------------------------------------------------------------------|
| 866 | V00FIBGRN  | Num  | 8   |        |          | SAQ:Block Brief 2000: daily dietary fiber from grains (g) (calc)                                |
| 867 | V00DTCYST  | Num  | 8   |        |          | SAQ:Block Brief 2000: daily nutrients from food, cysteine (mg) (calc)                           |
| 868 | V00DTSF    | Num  | 8   |        |          | SAQ:Block Brief 2000: grams of solid food (g), per week (calc)                                  |
| 869 | V00PCTPROT | Num  | 8   |        |          | SAQ:Block Brief 2000: daily percent of calories from protein (kcal) (calc)                      |
| 870 | V00SRVDRY  | Num  | 8   |        |          | SAQ:Block Brief 2000: daily servings of milk, yogurt and cheese (calc)                          |
| 871 | V00DTB6    | Num  | 8   |        |          | SAQ:Block Brief 2000: daily nutrients from food, vitamin B6 (mg) (calc)                         |
| 872 | V00SUPB1   | Num  | 8   |        |          | SAQ:Block Brief 2000: average daily nutrients from vitamin supplements, B1 (mg) (calc)          |
| 873 | V00SUPSE   | Num  | 8   |        |          | SAQ:Block Brief 2000: average daily nutrients from vitamin supplements, selenium (mcg) (calc)   |
| 874 | V00DTMG    | Num  | 8   |        |          | SAQ:Block Brief 2000: daily nutrients from food, magnesium (mg) (calc)                          |
| 875 | V00PCTFAT  | Num  | 8   |        |          | SAQ:Block Brief 2000: daily percent of calories from fat (kcal) (calc)                          |
| 876 | V00DTVITD  | Num  | 8   |        |          | SAQ:Block Brief 2000: daily nutrients from food, vitamin D (IU) (calc)                          |
| 877 | V00DTPROA  | Num  | 8   |        |          | SAQ:Block Brief 2000: daily nutrients from food, carotene, provitamin A carotenoids (ug) (calc) |
| 878 | V00DTCARB  | Num  | 8   |        |          | SAQ:Block Brief 2000: daily nutrients from food, carbohydrate (g) (calc)                        |
| 879 | V00PCTALCH | Num  | 8   |        |          | SAQ:Block Brief 2000: daily percent of calories from alcoholic beverages (kcal) (calc)          |
| 880 | V00DTFOL   | Num  | 8   |        |          | SAQ:Block Brief 2000: daily nutrients from food, folate (mcg) (calc)                            |
| 881 | V00DTLIN   | Num  | 8   |        |          | SAQ:Block Brief 2000: daily nutrients from food, polyunsaturated fat (g) (calc)                 |
| 882 | V00PCTLARG | Num  | 8   |        |          | SAQ:Block Brief 2000: error flag, percent of foods marked as large portion (calc)               |
| 883 | V00DTVITE  | Num  | 8   |        |          | SAQ:Block Brief 2000: daily nutrients from food, vitamin E a- TE (calc)                         |
| 884 | V00NNOSERV | Num  | 8   |        |          | SAQ:Block Brief 2000: error flag, number of food items with serving size omitted (calc)         |
| 885 | V00NSKIP   | Num  | 8   |        |          | SAQ:Block Brief 2000: error flag, number of food items skipped (calc)                           |
| 886 | V00DTCRYP  | Num  | 8   |        |          | SAQ:Block Brief 2000: daily nutrients from food, cryptoxanthin (carotenoid) (ug) (calc)         |

## The CONTENTS Procedure

## Variables in Creation Order

| #   | Variable   | Type | Len | Format  | Informat | Label                                                                                                                                                   |
|-----|------------|------|-----|---------|----------|---------------------------------------------------------------------------------------------------------------------------------------------------------|
| 887 | V00PCTMEDS | Num  | 8   |         |          | SAQ:Block Brief 2000: error flag, percent of foods marked as medium portion (calc)                                                                      |
| 888 | V00DTRIBO  | Num  | 8   |         |          | SAQ:Block Brief 2000: daily nutrients from food, riboflavin (B2) (mg) (calc)                                                                            |
| 889 | V00NERRORS | Num  | 8   |         |          | SAQ:Block Brief 2000: error flag, how many serious errors were applied (calc)                                                                           |
| 890 | V00DTZINC  | Num  | 8   |         |          | SAQ:Block Brief 2000: daily nutrients from food, zinc (mg) (calc)                                                                                       |
| 891 | V00FFQFLG5 | Num  | 8   | YNDK.   |          | SAQ:Block Brief 2000: exclusion criteria flag, more than 15% of questions were skipped (calc)                                                           |
| 892 | V00FFQFLG2 | Num  | 8   | YNDK.   |          | SAQ:Block Brief 2000: exclusion criteria flag,kcal less than 800/ greater than 4200 (men only),kcal less than 500/ greater than 3500 (women only)(calc) |
| 893 | V00FFQFLG1 | Num  | 8   | YNDK.   |          | SAQ:Block Brief 2000: exclusion criteria flag, kcal less than 500 or greater than 5000 (men and women) (calc)                                           |
| 894 | V00FFQFLG4 | Num  | 8   | YNDK.   |          | SAQ:Block Brief 2000: exclusion criteria flag, kcals greater than 3 times the interquartile range (calc)                                                |
| 895 | V00FFQFLG3 | Num  | 8   | YNDK.   |          | SAQ:Block Brief 2000: exclusion criteria flag, kcals greater than 2 standard deviations from the mean (calc)                                            |
| 896 | V00FFQSZW  | Num  | 8   | FFQ7X.  |          | SAQ:Block Brief 2000: wine/ wine coolers, how many glasses each time (calc)                                                                             |
| 897 | V00FFQSZL  | Num  | 8   | FFQ7X.  |          | SAQ:Block Brief 2000: liquor/ mixed drinks, how many drinks each time (calc)                                                                            |
| 898 | P01STFID2  | Char | 4   | \$4.    | \$4.     | SV:Height (standing): staff ID#                                                                                                                         |
| 899 | P01STFID1  | Char | 4   | \$4.    | \$4.     | SV:Weight: staff ID #                                                                                                                                   |
| 900 | P01HESTFID | Char | 4   | \$4.    | \$4.     | SV:Hand exam: staff ID #                                                                                                                                |
| 901 | V00BPSTFID | Char | 4   | \$4.    | \$4.     | EV:Blood pressure: staff ID #                                                                                                                           |
| 902 | V00BPCFSZ  | Num  | 8   | SIZE8X. | 2.       | EV:Q1.Blood pressure: what cuff size used                                                                                                               |
| 903 | V00BPARM   | Num  | 8   | LRB10X. | 2.       | EV:Q2.Blood pressure: what arm used to take measurement                                                                                                 |
| 904 | V00BPTERM  | Num  | 8   | YNDK.   | 2.       | EV:Q5.Blood pressure: was measurement terminated because MIL is >=300 mm Hg after second reading                                                        |
| 905 | V00BPSYS   | Num  | 8   | 4.      | 4.       | EV:Q6.Blood pressure: systolic (mm Hg)                                                                                                                  |
| 906 | V00BPDIAS  | Num  | 8   | 4.      | 4.       | EV:Q6.Blood pressure: diastolic (mm Hg)                                                                                                                 |
| 907 | V00RPSTFID | Char | 4   | \$4.    | \$4.     | EV:Radial pulse: staff ID #                                                                                                                             |
| 908 | V00RPAVG   | Num  | 8   | 4.      | 4.       | EV:Radial pulse: average beats per minute                                                                                                               |
| 909 | V00ACSTFID | Char | 4   | \$4.    | \$4.     | EV:Abdominal circumference: staff ID #                                                                                                                  |



## The CONTENTS Procedure

| Variables in Creation Order |            |      |     |          |          |                                                                                                                   |
|-----------------------------|------------|------|-----|----------|----------|-------------------------------------------------------------------------------------------------------------------|
| #                           | Variable   | Type | Len | Format   | Informat | Label                                                                                                             |
| 910                         | V00MAXCIRC | Num  | 8   | YNDK.    | 2.       | EV:Q7.Abdominal circumference: was maximal circumference (greatest protuberance) below the measured circumference |
| 911                         | V00SCSTFID | Char | 4   | \$4.     | \$4.     | EV:Single chair stand: staff ID #                                                                                 |
| 912                         | V00CSTSGL  | Num  | 8   | STAND4X. | 3.       | EV:Single chair stand                                                                                             |
| 913                         | V00RCSTFID | Char | 4   | \$4.     | \$4.     | EV:Repeated chair stands: staff ID #                                                                              |
| 914                         | V00CSTREP1 | Num  | 8   | CHAIR5X. | 3.       | EV:Repeated chair stands: trial 1                                                                                 |
| 915                         | V00CSTIME1 | Num  | 8   | 6.2      | 6.2      | EV:Repeated chair stands: trial 1 time (sec.hundredths/ sec)                                                      |
| 916                         | V00CSTNUM1 | Num  | 8   | CHAIR4X. | 2.       | EV:Repeated chair stands: trial 1, number completed without using arms                                            |
| 917                         | V00CSTREP2 | Num  | 8   | CHAIR5X. | 3.       | EV:Repeated chair stands: trial 2                                                                                 |
| 918                         | V00CSTIME2 | Num  | 8   | 6.2      | 6.2      | EV:Repeated chair stands: trial 2 time (sec.hundredths/ sec)                                                      |
| 919                         | V00CSTNUM2 | Num  | 8   | CHAIR4X. | 2.       | EV:Repeated chair stands: trial 2, number completed without using arms                                            |
| 920                         | V00KIKBALL | Num  | 8   | LRB2Z.   | 3.       | EV:Q1.Isometric strength: which leg use to kick ball                                                              |
| 921                         | V00EKRSR   | Num  | 8   | YNDK.    | 2.       | EV:Q2.Isometric strength: right knee, ever had knee replacement surgery                                           |
| 922                         | V00RLLGTH  | Num  | 8   | 5.1      | 5.1      | EV:Q3.Isometric strength: right leg length from transducer to joint line (cm)                                     |
| 923                         | V00RLBACK  | Num  | 8   | 5.1      | 5.1      | EV:Q4a.Isometric strength: right leg chair and transducer settings, back support (cm)                             |
| 924                         | V00RLARM   | Num  | 8   | 5.1      | 5.1      | EV:Q4b.Isometric strength: right leg chair and transducer settings, arm support (cm)                              |
| 925                         | V00RLHORIZ | Num  | 8   | 5.1      | 5.1      | EV:Q4c.Isometric strength: right leg chair and transducer settings, horizontal bar (knee angle fix) (cm)          |
| 926                         | V00RLVERT  | Num  | 8   | 5.1      | 5.1      | EV:Q4d.Isometric Strength: right leg chair and transducer settings, vertical bar (height) (cm)                    |
| 927                         | V00REXP    | Num  | 8   | YNDK.    | 3.       | EV:Q7.Isometric strength: right knee extension, any knee pain during test                                         |
| 928                         | V00REXCOMP | Num  | 8   | YNDK.    | 3.       | EV:Q8.Isometric strength: right knee extension, able to complete (3) measurements                                 |
| 929                         | V00REXWHY1 | Num  | 8   | YNDK.    | 2.       | EV:Q8a.Isometric strength: right knee extension, not able to complete measurements, knee pain                     |
| 930                         | V00REXWHY2 | Num  | 8   | YNDK.    | 2.       | EV:Q8a.Isometric strength: right knee extension, not able to complete measurements, equipment problems            |
| 931                         | V00REXWHY3 | Num  | 8   | YNDK.    | 2.       | EV:Q8a.Isometric strength: right knee extension, not able to complete measurements, participant fatigue           |

## The CONTENTS Procedure

| Variables in Creation Order |            |      |     |        |          |                                                                                                          |
|-----------------------------|------------|------|-----|--------|----------|----------------------------------------------------------------------------------------------------------|
| #                           | Variable   | Type | Len | Format | Informat | Label                                                                                                    |
| 932                         | V00REXWHY4 | Num  | 8   | YNDK.  | 2.       | EV:Q8a.Isometric strength: right knee extension, not able to complete measurements, participant refused  |
| 933                         | V00REXWHY5 | Num  | 8   | YNDK.  | 2.       | EV:Q8a.Isometric strength: right knee extension, not able to complete measurements, other                |
| 934                         | V00RFXPN   | Num  | 8   | YNDK.  | 3.       | EV:Q10.Isometric strength: right knee flexion, any knee pain during test                                 |
| 935                         | V00RFXCOMP | Num  | 8   | YNDK.  | 3.       | EV:Q11.Isometric strength: right knee flexion, able to complete (3) measurements                         |
| 936                         | V00RFXWHY1 | Num  | 8   | YNDK.  | 2.       | EV:Q11a.Isometric strength: right knee flexion, not able to complete measurements, knee pain             |
| 937                         | V00RFXWHY2 | Num  | 8   | YNDK.  | 2.       | EV:Q11a.Isometric strength: right knee flexion, not able to complete measurements, equipment problems    |
| 938                         | V00RFXWHY3 | Num  | 8   | YNDK.  | 2.       | EV:Q11a.Isometric strength: right knee flexion, not able to complete measurements, participant fatigue   |
| 939                         | V00RFXWHY4 | Num  | 8   | YNDK.  | 2.       | EV:Q11a.Isometric strength: right knee flexion, not able to complete measurements, participant refused   |
| 940                         | V00RFXWHY5 | Num  | 8   | YNDK.  | 2.       | EV:Q11a.Isometric strength: right knee flexion, not able to complete measurements, other                 |
| 941                         | V00EKRS�   | Num  | 8   | YNDK.  | 2.       | EV:Q12.Isometric strength: left knee, ever had knee replacement surgery                                  |
| 942                         | V00LLGTH   | Num  | 8   | 5.1    | 5.1      | EV:Q13.Isometric strength: left leg length from transducer to joint line (cm)                            |
| 943                         | V00TRANSET | Num  | 8   | YNDK.  | 2.       | EV:Q14.Isometric strength: chair and transducer settings for left leg same as right leg settings         |
| 944                         | V00LLBACK  | Num  | 8   | 5.1    | 5.1      | EV:Q15a.Isometric strength: left leg chair and transducer settings, back support (cm)                    |
| 945                         | V00LLARM   | Num  | 8   | 5.1    | 5.1      | EV:Q15b.Isometric strength: left leg chair and transducer settings, arm support (cm)                     |
| 946                         | V00LLHORIZ | Num  | 8   | 5.1    | 5.1      | EV:Q15c.Isometric strength: left leg chair and transducer settings, horizontal bar (knee angle fix) (cm) |
| 947                         | V00LLVERT  | Num  | 8   | 5.1    | 5.1      | EV:Q15d.Isometric strength: left leg chair and transducer settings, vertical bar (height) (cm)           |
| 948                         | V00LEXPŒ   | Num  | 8   | YNDK.  | 3.       | EV:Q18.Isometric strength: left knee extension, any knee pain during test                                |
| 949                         | V00LEXCOMP | Num  | 8   | YNDK.  | 2.       | EV:Q19.Isometric strength: left knee extension, able to complete (3) measurements                        |
| 950                         | V00LEXWHY1 | Num  | 8   | YNDK.  | 2.       | EV:Q19a.Isometric strength: left knee extension, not able to complete measurements, knee pain            |
| 951                         | V00LEXWHY2 | Num  | 8   | YNDK.  | 2.       | EV:Q19a.Isometric strength: left knee extension, not able to complete measurements, equipment problems   |

## The CONTENTS Procedure

| Variables in Creation Order |            |      |     |          |          |                                                                                                         |
|-----------------------------|------------|------|-----|----------|----------|---------------------------------------------------------------------------------------------------------|
| #                           | Variable   | Type | Len | Format   | Informat | Label                                                                                                   |
| 952                         | V00LEXWHY3 | Num  | 8   | YNDK.    | 2.       | EV:Q19a.Isometric strength: left knee extension, not able to complete measurements, participant fatigue |
| 953                         | V00LEXWHY4 | Num  | 8   | YNDK.    | 2.       | EV:Q19a.Isometric strength: left knee extension, not able to complete measurements, participant refused |
| 954                         | V00LEXWHY5 | Num  | 8   | YNDK.    | 2.       | EV:Q19a.Isometric strength: left knee extension, not able to complete measurements, other               |
| 955                         | V00LFXPN   | Num  | 8   | YNDK.    | 3.       | EV:Q21.Isometric strength: left knee flexion, any knee pain during test                                 |
| 956                         | V00LFXCOMP | Num  | 8   | YNDK.    | 2.       | EV:Q22.Isometric strength: left knee flexion, able to complete (3) measurements                         |
| 957                         | V00LFXWHY1 | Num  | 8   | YNDK.    | 2.       | EV:Q22a.Isometric strength: left knee flexion, not able to complete measurements, knee pain             |
| 958                         | V00LFXWHY2 | Num  | 8   | YNDK.    | 2.       | EV:Q22a.Isometric strength: left knee flexion, not able to complete measurements, equipment problems    |
| 959                         | V00LFXWHY3 | Num  | 8   | YNDK.    | 2.       | EV:Q22a.Isometric strength: left knee flexion, not able to complete measurements, participant fatigue   |
| 960                         | V00LFXWHY4 | Num  | 8   | YNDK.    | 2.       | EV:Q22a.Isometric strength: left knee flexion, not able to complete measurements, participant refused   |
| 961                         | V00LFXWHY5 | Num  | 8   | YNDK.    | 2.       | EV:Q22a.Isometric strength: left knee flexion, not able to complete measurements, other                 |
| 962                         | V00W2STFID | Char | 4   | \$4.     | \$4.     | EV:20- meter walk: staff ID #                                                                           |
| 963                         | V00STEPST1 | Num  | 8   | 3.       | 3.       | EV:Q1.20- meter walk: trial 1 number of steps                                                           |
| 964                         | V00TIMET1  | Num  | 8   | 6.2      | 6.2      | EV:Q1.20- meter walk: trial 1 time to complete (sec.hundredths/ sec)                                    |
| 965                         | V00WLK20T1 | Num  | 8   | WALK10X. | 3.       | EV:Q1.20- meter walk: trial 1 result                                                                    |
| 966                         | V00STEPST2 | Num  | 8   | 3.       | 3.       | EV:Q2.20- meter walk: trial 2 number of steps                                                           |
| 967                         | V00TIMET2  | Num  | 8   | 6.2      | 6.2      | EV:Q2.20- meter walk: trial 2 time to complete (sec.hundredths/ sec)                                    |
| 968                         | V00WLK20T2 | Num  | 8   | WALK10X. | 3.       | EV:Q2.20- meter walk: trial 2 result                                                                    |
| 969                         | V00WLKAID  | Num  | 8   | YNDK.    | 2.       | EV:Q3.20- meter walk: using walking aid such as cane                                                    |
| 970                         | V00W4STFID | Char | 4   | \$4.     | \$4.     | EV:400- meter walk: staff ID #                                                                          |
| 971                         | V00W20COMP | Num  | 8   | YNDK.    | 2.       | EV:Q1.400- meter walk eligibility: able to complete trial 1 and trial 2 of the 20- meter walk           |
| 972                         | V00WALKER  | Num  | 8   | YNDK.    | 3.       | EV:Q6.400- meter walk eligibility: use walker or quad cane when walk                                    |
| 973                         | V00SAFEWLK | Num  | 8   | YNDK.    | 3.       | EV:Q12.400- meter walk eligibility: feel it would be safe to try to walk up and down hallway            |
| 974                         | V00HRB4WLK | Num  | 8   | 4.       | 4.       | EV:Q1.400- meter walk: heart rate before walk                                                           |

## The CONTENTS Procedure

| Variables in Creation Order |            |      |     |         |          |                                                                                                                      |
|-----------------------------|------------|------|-----|---------|----------|----------------------------------------------------------------------------------------------------------------------|
| #                           | Variable   | Type | Len | Format  | Informat | Label                                                                                                                |
| 975                         | V00RESTT1  | Num  | 8   | WALK1Z. | 2.       | EV:Q3a.400- meter walk: rest stop #1                                                                                 |
| 976                         | V00RESTT2  | Num  | 8   | WALK1Z. | 2.       | EV:Q3b.400- meter walk: rest stop #2                                                                                 |
| 977                         | V00RESTT3  | Num  | 8   | WALK1Z. | 2.       | EV:Q3c.400- meter walk: rest stop #3                                                                                 |
| 978                         | V00RESTT4  | Num  | 8   | WALK1Z. | 2.       | EV:Q3d.400- meter walk: rest stop #4                                                                                 |
| 979                         | V00RESTT5  | Num  | 8   | WALK1Z. | 2.       | EV:Q3e.400- meter walk: rest stop #5                                                                                 |
| 980                         | V00RESTT6  | Num  | 8   | WALK1Z. | 2.       | EV:Q3f.400- meter walk: rest stop #6                                                                                 |
| 981                         | V00RESTT7  | Num  | 8   | WALK1Z. | 2.       | EV:Q3g.400- meter walk: rest stop #7                                                                                 |
| 982                         | V00RESTT8  | Num  | 8   | WALK1Z. | 2.       | EV:Q3h.400- meter walk: rest stop #8                                                                                 |
| 983                         | V00RESTT9  | Num  | 8   | WALK1Z. | 2.       | EV:Q3i.400- meter walk: rest stop #9                                                                                 |
| 984                         | V00RESTT10 | Num  | 8   | WALK1Z. | 2.       | EV:Q3j.400- meter walk: rest stop #10                                                                                |
| 985                         | V00NUMSTOP | Num  | 8   | 3.      | 3.       | EV:Q4.400- meter walk: total number rest stops                                                                       |
| 986                         | V00HR400WK | Num  | 8   | 4.      | 4.       | EV:Q8.400- meter walk: heart rate at 400- m or at stop                                                               |
| 987                         | V00HR135   | Num  | 8   | YNDK.   | 2.       | EV:Q9.400- meter walk: heart rate exceed 135 bpm during walk                                                         |
| 988                         | V00CANEUSE | Num  | 8   | YNDK.   | 2.       | EV:Q10.400- meter walk: use cane                                                                                     |
| 989                         | V00COMP10  | Num  | 8   | YNDK.   | 2.       | EV:Q11.400- meter walk: complete full 10 laps                                                                        |
| 990                         | V00REASW1  | Num  | 8   | YNDK.   | 2.       | EV:Q11a.400- meter walk: not able to complete 10 laps, excluded based on eligibility criteria                        |
| 991                         | V00REASW2  | Num  | 8   | YNDK.   | 2.       | EV:Q11a.400- meter walk: not able to complete 10 laps, began walk but could not complete                             |
| 992                         | V00REASW3  | Num  | 8   | YNDK.   | 2.       | EV:Q11a.400- meter walk: not able to complete 10 laps, heart rate exceeded 135 bpm during walk and did not feel well |
| 993                         | V00REASW4  | Num  | 8   | YNDK.   | 2.       | EV:Q11a.400- meter walk: not able to complete 10 laps, heart rate fell below 40 bpm during walk                      |
| 994                         | V00REASW5  | Num  | 8   | YNDK.   | 2.       | EV:Q11a.400- meter walk: not able to complete 10 laps, reported felt too tired during walk                           |
| 995                         | V00REASW6  | Num  | 8   | YNDK.   | 2.       | EV:Q11a.400- meter walk: not able to complete 10 laps, reported chest pain during walk                               |
| 996                         | V00REASW7  | Num  | 8   | YNDK.   | 2.       | EV:Q11a.400- meter walk: not able to complete 10 laps, reported shortness of breath during walk                      |
| 997                         | V00REASW8  | Num  | 8   | YNDK.   | 2.       | EV:Q11a.400- meter walk: not able to complete 10 laps, reported feeling faint during walk                            |
| 998                         | V00REASW9  | Num  | 8   | YNDK.   | 2.       | EV:Q11a.400- meter walk: not able to complete 10 laps, reported knee pain during walk                                |
| 999                         | V00REASW10 | Num  | 8   | YNDK.   | 2.       | EV:Q11a.400- meter walk: not able to complete 10 laps, reported hip pain during walk                                 |

## The CONTENTS Procedure

| Variables in Creation Order |            |      |     |         |          |                                                                                                        |
|-----------------------------|------------|------|-----|---------|----------|--------------------------------------------------------------------------------------------------------|
| #                           | Variable   | Type | Len | Format  | Informat | Label                                                                                                  |
| 1000                        | V00REASW11 | Num  | 8   | YNDK.   | 2.       | EV:Q11a.400- meter walk: not able to complete 10 laps, reported calf pain during walk                  |
| 1001                        | V00REASW12 | Num  | 8   | YNDK.   | 2.       | EV:Q11a.400- meter walk: not able to complete 10 laps, reported back pain during walk                  |
| 1002                        | V00REASW13 | Num  | 8   | YNDK.   | 2.       | EV:Q11a.400- meter walk: not able to complete 10 laps, sat down during walk                            |
| 1003                        | V00REASW14 | Num  | 8   | YNDK.   | 2.       | EV:Q11a.400- meter walk: not able to complete 10 laps, more than 15 minutes elapsed from start of test |
| 1004                        | V00REASW15 | Num  | 8   | YNDK.   | 3.       | EV:Q11a.400- meter walk: not able to complete 10 laps, refused                                         |
| 1005                        | V00REASW16 | Num  | 8   | YNDK.   | 2.       | EV:Q11a.400- meter walk: not able to complete 10 laps, other                                           |
| 1006                        | V00DISCOMF | Num  | 8   | YNDK.   | 2.       | EV:Q12.400- meter walk: any discomfort                                                                 |
| 1007                        | V00SOB400W | Num  | 8   | YNDK.   | 2.       | EV:Q12a.400- meter walk: type of discomfort, shortness of breath                                       |
| 1008                        | V00WHE400W | Num  | 8   | YNDK.   | 2.       | EV:Q12a.400- meter walk: type of discomfort, wheezing/ dyspnea                                         |
| 1009                        | V00PN400W  | Num  | 8   | YNDK.   | 2.       | EV:Q12a.400- meter walk: type of discomfort, pain                                                      |
| 1010                        | V00OTH400W | Num  | 8   | YNDK.   | 2.       | EV:Q12a.400- meter walk: type of discomfort, other                                                     |
| 1011                        | V00RPN400W | Num  | 8   | YNDK.   | 2.       | EV:Q13.400- meter walk: right knee pain during walk                                                    |
| 1012                        | V00RPWKTYP | Num  | 8   | PAIN1Z. | 3.       | EV:Q13i.400- meter walk: right knee pain mild, moderate or severe                                      |
| 1013                        | V00RPWKPRV | Num  | 8   | YNDK.   | 3.       | EV:Q13ii.400- meter walk: right knee pain prevent from walking at usual pace                           |
| 1014                        | V00LPN400W | Num  | 8   | YNDK.   | 2.       | EV:Q13.400- meter walk: left knee pain during walk                                                     |
| 1015                        | V00LPWKTYP | Num  | 8   | PAIN1Z. | 3.       | EV:Q13i.400- meter walk: left knee pain mild, moderate or severe                                       |
| 1016                        | V00LPWKPRV | Num  | 8   | YNDK.   | 3.       | EV:Q13ii.400- meter walk: left knee pain prevent walking at usual pace                                 |
| 1017                        | V00NPN400W | Num  | 8   | YNDK.   | 2.       | EV:Q13.400- meter walk: no knee pain during walk                                                       |
| 1018                        | V00DKP400W | Num  | 8   | YNDK.   | 3.       | EV:Q13.400- meter walk: knee pain during walk, don't know                                              |
| 1019                        | V00RFP400W | Num  | 8   | YNDK.   | 3.       | EV:Q13.400- meter walk: knee pain during walk, refused                                                 |
| 1020                        | V00K1STFID | Char | 4   | \$4.    | \$4.     | EV:Knee exam: staff ID #                                                                               |
| 1021                        | V00RKPATPN | Num  | 8   | YNDK.   | 3.       | EV:Right knee exam: patellar quadriceps tendinitis, pain/ tenderness at any four sites                 |

## The CONTENTS Procedure

| Variables in Creation Order |            |      |     |          |          |                                                                                       |
|-----------------------------|------------|------|-----|----------|----------|---------------------------------------------------------------------------------------|
| #                           | Variable   | Type | Len | Format   | Informat | Label                                                                                 |
| 1022                        | V00LKPATPN | Num  | 8   | YNDK.    | 3.       | EV:Left knee exam: patellar quadriceps tendinitis, pain/ tenderness at any four sites |
| 1023                        | V00RKEFFB  | Num  | 8   | YNDK.    | 3.       | EV:Right knee exam: effusion, bulge sign positive                                     |
| 1024                        | V00RKEFFPT | Num  | 8   | YNDK10B. | 3.       | EV:Right knee exam: effusion, patellar tap positive                                   |
| 1025                        | V00LKEFFB  | Num  | 8   | YNDK.    | 3.       | EV:Left knee exam: effusion, bulge sign positive                                      |
| 1026                        | V00LKEFFPT | Num  | 8   | YNDK10B. | 3.       | EV:Left knee exam: effusion, patellar tap positive                                    |
| 1027                        | V00RKRFXP  | Num  | 8   | YNDK.    | 2.       | EV:Right knee exam: knee flexion pain/ tenderness present on exam                     |
| 1028                        | V00LKRFXP  | Num  | 8   | YNDK.    | 2.       | EV:Left knee exam: knee flexion pain/ tenderness present on exam                      |
| 1029                        | V00RKLTPN  | Num  | 8   | YNDK.    | 3.       | EV:Right knee exam: lateral tibiofemoral pain/ tenderness present on exam             |
| 1030                        | V00RKMTTPN | Num  | 8   | YNDK.    | 3.       | EV:Right knee exam: medial tibiofemoral pain/ tenderness present on exam              |
| 1031                        | V00RKABPN  | Num  | 8   | YNDK.    | 3.       | EV:Right knee exam: anserine bursa, pain/ tenderness present on exam                  |
| 1032                        | V00LKLTPN  | Num  | 8   | YNDK.    | 3.       | EV:Left knee exam: lateral tibiofemoral pain/ tenderness present on exam              |
| 1033                        | V00LKMTTPN | Num  | 8   | YNDK.    | 3.       | EV:Left knee exam: medial tibiofemoral pain/ tenderness present on exam               |
| 1034                        | V00LKABPN  | Num  | 8   | YNDK.    | 3.       | EV:Left knee exam: anserine bursa, pain/ tenderness present on exam                   |
| 1035                        | V00RKPFCRE | Num  | 8   | YNDK.    | 3.       | EV:Right knee exam: patello- femoral crepitus present on exam                         |
| 1036                        | V00LKPFCRE | Num  | 8   | YNDK.    | 3.       | EV:Left knee exam: patello- femoral crepitus present on exam                          |
| 1037                        | V00RKPGDPN | Num  | 8   | YNDK.    | 3.       | EV:Right knee exam: patellar grind, painful or tender behind knee cap                 |
| 1038                        | V00LKPGDPN | Num  | 8   | YNDK.    | 3.       | EV:Left knee exam: patellar grind, painful or tender behind knee cap                  |
| 1039                        | V00LLWGT   | Num  | 8   | 3.       | 3.       | EV:Q16.Isometric strength: left leg weight (N)                                        |
| 1040                        | V00RLWGT   | Num  | 8   | 3.       | 3.       | EV:Q5.Isometric strength: right leg weight (N)                                        |
| 1041                        | P01HEIGHT  | Num  | 8   |          |          | SV:Average height (mm) (calc)                                                         |
| 1042                        | P01WEIGHT  | Num  | 8   |          |          | SV:Average current scale weight (kg) (calc)                                           |
| 1043                        | P01BMI     | Num  | 8   |          |          | SV:Body mass index (calc)                                                             |
| 1044                        | P01RH1CV   | Num  | 8   | JOINT.   |          | SV:Right hand exam: joint 1 (calc)                                                    |
| 1045                        | P01RH2CV   | Num  | 8   | JOINT.   |          | SV:Right hand exam: joint 2 (calc)                                                    |
| 1046                        | P01RH3CV   | Num  | 8   | JOINT.   |          | SV:Right hand exam: joint 3 (calc)                                                    |

## The CONTENTS Procedure

| Variables in Creation Order |            |      |     |         |          |                                                                                                       |
|-----------------------------|------------|------|-----|---------|----------|-------------------------------------------------------------------------------------------------------|
| #                           | Variable   | Type | Len | Format  | Informat | Label                                                                                                 |
| 1047                        | P01RH4CV   | Num  | 8   | JOINT.  |          | SV:Right hand exam: joint 4 (calc)                                                                    |
| 1048                        | P01RH5CV   | Num  | 8   | JOINT.  |          | SV:Right hand exam: joint 5 (calc)                                                                    |
| 1049                        | P01LH1CV   | Num  | 8   | JOINT.  |          | SV:Left hand exam: joint 1 (calc)                                                                     |
| 1050                        | P01LH2CV   | Num  | 8   | JOINT.  |          | SV:Left hand exam: joint 2 (calc)                                                                     |
| 1051                        | P01LH3CV   | Num  | 8   | JOINT.  |          | SV:Left hand exam: joint 3 (calc)                                                                     |
| 1052                        | P01LH4CV   | Num  | 8   | JOINT.  |          | SV:Left hand exam: joint 4 (calc)                                                                     |
| 1053                        | P01LH5CV   | Num  | 8   | JOINT.  |          | SV:Left hand exam: joint 5 (calc)                                                                     |
| 1054                        | P01RHBE    | Num  | 8   | LADDER. |          | SV:Right hand exam: total number of bony enlargements (calc)                                          |
| 1055                        | P01LHBE    | Num  | 8   | LADDER. |          | SV:Left hand exam: total number of bony enlargements (calc)                                           |
| 1056                        | V00ABCIRC  | Num  | 8   | 5.1     |          | EV:Abdominal circumference (cm) (calc)                                                                |
| 1057                        | V00CS5     | Num  | 8   | YNDK.   |          | EV:Repeated chair stands: able to complete 5 stands (calc)                                            |
| 1058                        | V00CSPACE  | Num  | 8   |         |          | EV WBK:Repeated chair stand: pace in stands/ sec (calc)                                               |
| 1059                        | V00REXP1CV | Num  | 8   | PAIN1Z. |          | EV:Q7a.Isometric strength: right knee extension, severity of pain (calc)                              |
| 1060                        | V00REXP2CV | Num  | 8   | EXP.    |          | EV:Q7b.Isometric strength: right knee extension, knee pain prevent from pushing as hard as can (calc) |
| 1061                        | V00RFXP1CV | Num  | 8   | PAIN1Z. |          | EV:Q10a.Isometric strength: right knee flexion, severity of pain (calc)                               |
| 1062                        | V00RFXP2CV | Num  | 8   | FXP.    |          | EV:Q10b.Isometric strength: right knee flexion, pain prevent from pulling as hard as can (calc)       |
| 1063                        | V00LEXP1CV | Num  | 8   | PAIN1Z. |          | EV:Q18a.Isometric strength: left knee extension, severity of pain (calc)                              |
| 1064                        | V00LEXP2CV | Num  | 8   | EXP.    |          | EV:Q18b.Isometric strength: left knee extension, pain prevent from pushing as hard as can (calc)      |
| 1065                        | V00LFXP1CV | Num  | 8   | PAIN1Z. |          | EV:Q21a.Isometric strength: left knee flexion, severity of pain (calc)                                |
| 1066                        | V00LFXP2CV | Num  | 8   | FXP.    |          | EV:Q21b.Isometric strength: left knee flexion, pain prevent from pulling as hard as can (calc)        |
| 1067                        | V0020MPACE | Num  | 8   | 6.3     |          | EV:20- meter walk: pace (m/ sec) (calc)                                                               |
| 1068                        | V00400MTR  | Num  | 8   |         |          | EV:400- meter walk: total meters walked (calc)                                                        |
| 1069                        | V00KEXAMK  | Num  | 8   | LRB.    |          | EV:Knee exam: knee eligible to be examined (calc)                                                     |
| 1070                        | V00RKFHDEG | Num  | 8   |         |          | EV:Right knee exam: flexion contracture/ hyperextension, degrees (contracture positive) (calc)        |

## The CONTENTS Procedure

## Variables in Creation Order

| #    | Variable    | Type | Len | Format   | Informat | Label                                                                                         |
|------|-------------|------|-----|----------|----------|-----------------------------------------------------------------------------------------------|
| 1071 | V00LKFHDEG  | Num  | 8   |          |          | EV:Left knee exam: flexion contracture/ hyperextension, degrees (contracture positive) (calc) |
| 1072 | V00RKALNMT  | Num  | 8   |          |          | EV:Right knee exam: alignment, degrees (valgus negative) (calc)                               |
| 1073 | V00LKALNMT  | Num  | 8   |          |          | EV:Left knee exam: alignment, degrees (valgus negative) (calc)                                |
| 1074 | V00isstfid  | Char | 4   | \$4.     | \$4.     | Isometric Strength Staff ID #                                                                 |
| 1075 | V00isexmdt  | Num  | 8   | MMDDYY8. | DATE9.   | ExamDate                                                                                      |
| 1076 | V00rftrial  | Num  | 8   | SPECF.   |          | Right Flexion MAX Force TRIAL No                                                              |
| 1077 | V00rfmaxf   | Num  | 8   | SPECF.   |          | Right Flexion MAX Force                                                                       |
| 1078 | V00rfTLPL   | Num  | 8   |          |          | Right Flexion MAX Force Low Production Limit                                                  |
| 1079 | V00rfTHPL   | Num  | 8   |          |          | Right Flexion MAX Force High Production Limit                                                 |
| 1080 | V00rfTLRL   | Num  | 8   |          |          | Right Flexion MAX Force Low Relaxation Limit                                                  |
| 1081 | V00rfTHRL   | Num  | 8   |          |          | Right Flexion MAX Force High Relaxation Limit                                                 |
| 1082 | V00retrial  | Num  | 8   | SPECF.   |          | Right Extension MAX Force TRIAL No                                                            |
| 1083 | V00remaxf   | Num  | 8   | SPECF.   |          | Right Extension MAX Force                                                                     |
| 1084 | V00reTLPL   | Num  | 8   |          |          | Right Extension MAX Force Low Production Limit                                                |
| 1085 | V00reTHPL   | Num  | 8   |          |          | Right Extension MAX Force High Production Limit                                               |
| 1086 | V00reTLRL   | Num  | 8   |          |          | Right Extension MAX Force Low Relaxation Limit                                                |
| 1087 | V00reTHRL   | Num  | 8   |          |          | Right Extension MAX Force High Relaxation Limit                                               |
| 1088 | V00lfttrial | Num  | 8   | SPECF.   |          | Left Flexion MAX Force TRIAL No                                                               |
| 1089 | V00lftmaxf  | Num  | 8   | SPECF.   |          | Left Flexion MAX Force                                                                        |
| 1090 | V00lftTLPL  | Num  | 8   |          |          | Left Flexion MAX Force Low Production Limit                                                   |
| 1091 | V00lftTHPL  | Num  | 8   |          |          | Left Flexion MAX Force High Production Limit                                                  |
| 1092 | V00lftTLRL  | Num  | 8   |          |          | Left Flexion MAX Force Low Relaxation Limit                                                   |
| 1093 | V00lftTHRL  | Num  | 8   |          |          | Left Flexion MAX Force High Relaxation Limit                                                  |
| 1094 | V00letrial  | Num  | 8   | SPECF.   |          | Left Extension MAX Force TRIAL No                                                             |



## The CONTENTS Procedure

## Variables in Creation Order

| #    | Variable   | Type | Len | Format    | Informat | Label                                                                                                                                                   |
|------|------------|------|-----|-----------|----------|---------------------------------------------------------------------------------------------------------------------------------------------------------|
| 1095 | V00lemaxf  | Num  | 8   | SPECF.    |          | Left Extension MAX Force                                                                                                                                |
| 1096 | V00leTLPL  | Num  | 8   |           |          | Left Extension MAX Force Low Production Limit                                                                                                           |
| 1097 | V00leTHPL  | Num  | 8   |           |          | Left Extension MAX Force High Production Limit                                                                                                          |
| 1098 | V00leTLRL  | Num  | 8   |           |          | Left Extension MAX Force Low Relaxation Limit                                                                                                           |
| 1099 | V00leTHRL  | Num  | 8   |           |          | Left Extension MAX Force High Relaxation Limit                                                                                                          |
| 1100 | V00CALLDOC | Num  | 8   | YNDK.     | 3.       | EV:Q7.400- meter walk eligibility: had to see or call doctor for worsening angina (chest or heart pain) or worsening shortness of breath, past 3 months |
| 1101 | V00HRELG   | Num  | 8   | EXCL.     |          | EV:400- meter walk eligibility: meets old or new heart rate exclusion criterion (calc)                                                                  |
| 1102 | V00SYSELG  | Num  | 8   | EXCL.     |          | EV:400- meter walk eligibility: meets new or old systolic blood pressure exclusion criterion (calc)                                                     |
| 1103 | V00DIASELG | Num  | 8   | EXCL.     |          | EV:400- meter walk eligibility: meets new or old diastolic blood pressure exclusion criterion (calc)                                                    |
| 1104 | V00400MCMP | Num  | 8   | PERFCOMP. |          | EV:400- meter walk: completion status (calc)                                                                                                            |
| 1105 | V00400MTIM | Num  | 8   | 6.2       |          | EV:400- meter walk: total time at 400- m or at stop (sec) (calc)                                                                                        |
| 1106 | V00rexcmp2 | Num  | 8   | YNDK.     |          | Right Extension Completed >=2 Good Trials                                                                                                               |
| 1107 | V00lexcmp2 | Num  | 8   | YNDK.     |          | Left Extension Completed >=2 Good Trials                                                                                                                |
| 1108 | V00rfxcmp2 | Num  | 8   | YNDK.     |          | Right Flexion Completed >=2 Good Trials                                                                                                                 |
| 1109 | V00lfxcmp2 | Num  | 8   | YNDK.     |          | Left Flexion Completed >=2 Good Trials                                                                                                                  |
| 1110 | V00400PAIN | Num  | 8   | LRB.      |          | EV:400- meter walk: knee pain, which leg (calc)                                                                                                         |
| 1111 | V00lkdefcv | Num  | 8   | VARVAL.   |          | EV:Left knee exam: alignment varus or valgus (calc)                                                                                                     |
| 1112 | V00rkdefcv | Num  | 8   | VARVAL.   |          | EV:Right knee exam: alignment varus or valgus (calc)                                                                                                    |
| 1113 | V00400EXCL | Num  | 8   | EXCLUD.   |          | EV:400- meter walk: reason excluded (calc)                                                                                                              |
| 1114 | V00HOSPSUR | Num  | 8   | EXCL.     |          | EV:400- meter walk eligibility: meets new or old hospitalization/ surgery exclusion criteria (calc)                                                     |
| 1115 | V00rfSFR   | Num  | 8   |           |          | Right Flexion Speed of Force Relaxation                                                                                                                 |
| 1116 | V00leSFR   | Num  | 8   |           |          | Left Extension Speed of Force Relaxation                                                                                                                |

## The CONTENTS Procedure

| Variables in Creation Order |            |      |     |           |              |                                                                                                                                                 |
|-----------------------------|------------|------|-----|-----------|--------------|-------------------------------------------------------------------------------------------------------------------------------------------------|
| #                           | Variable   | Type | Len | Format    | Informat     | Label                                                                                                                                           |
| 1117                        | V00lfSFP   | Num  | 8   |           |              | Left Flexion Speed of Force Production                                                                                                          |
| 1118                        | V00reSFP   | Num  | 8   |           |              | Right Extension Speed of Force Production                                                                                                       |
| 1119                        | V00reSFR   | Num  | 8   |           |              | Right Extension Speed of Force Relaxation                                                                                                       |
| 1120                        | V00lfSFR   | Num  | 8   |           |              | Left Flexion Speed of Force Relaxation                                                                                                          |
| 1121                        | V00rfSFP   | Num  | 8   |           |              | Right Flexion Speed of Force Production                                                                                                         |
| 1122                        | V00leSFP   | Num  | 8   |           |              | Left Extension Speed of Force Production                                                                                                        |
| 1123                        | P02DATE    | Num  | 8   | MMDDYY10. | DATETIME22.3 | IEI:Date Initial Eligibility Interview completed                                                                                                |
| 1124                        | P02KRS3    | Num  | 8   | YNDK.     | 3.           | IEI:Q13.Either knee, considering knee replacement surgery, next 3 years                                                                         |
| 1125                        | P02PA1     | Num  | 8   | YNDK.     | 3.           | IEI:Q14a.Climb up total of 10 or more flights of stairs on most days                                                                            |
| 1126                        | P02PA2     | Num  | 8   | YNDK.     | 3.           | IEI:Q14b.Kneel for 30 minutes or more on most days                                                                                              |
| 1127                        | P02PA3     | Num  | 8   | YNDK.     | 3.           | IEI:Q14c.Squat or deep knee bend for 30 minutes or more on most days                                                                            |
| 1128                        | P02PA4     | Num  | 8   | YNDK.     | 3.           | IEI:Q14d.Lift or move objects weighing 25 lbs. or more by hand on most days                                                                     |
| 1129                        | P02FAMHXKR | Num  | 8   | YNDK.     | 3.           | IEI:Q15.Mother, father, sister, or brother (blood relative) had knee repl surgery where all/ part of knee replaced (used for study eligibility) |
| 1130                        | P02JBMP    | Num  | 8   | YNDK.     | 3.           | IEI:Q16.Observe obvious hard bumps on joints closest to fingertips                                                                              |
| 1131                        | P02STMED   | Num  | 8   | YNDK.     | 3.           | IEI:Q23.Participating in any research study that includes taking medications or supplements                                                     |
| 1132                        | P02HR1     | Num  | 8   | YNDK.     | 2.           | IEI:Q42.How heard about OAI: brochure                                                                                                           |
| 1133                        | P02HR2     | Num  | 8   | YNDK.     | 2.           | IEI:Q42.How heard about OAI: doctor                                                                                                             |
| 1134                        | P02HR3     | Num  | 8   | YNDK.     | 2.           | IEI:Q42.How heard about OAI: flyer                                                                                                              |
| 1135                        | P02HR4     | Num  | 8   | YNDK.     | 2.           | IEI:Q42.How heard about OAI: friend/ family                                                                                                     |
| 1136                        | P02HR5     | Num  | 8   | YNDK.     | 2.           | IEI:Q42.How heard about OAI: mail                                                                                                               |
| 1137                        | P02HR6     | Num  | 8   | YNDK.     | 2.           | IEI:Q42.How heard about OAI: newspaper                                                                                                          |
| 1138                        | P02HR7     | Num  | 8   | YNDK.     | 2.           | IEI:Q42.How heard about OAI: radio advertisement                                                                                                |
| 1139                        | P02HR8     | Num  | 8   | YNDK.     | 2.           | IEI:Q42.How heard about OAI: television                                                                                                         |
| 1140                        | P02HR9     | Num  | 8   | YNDK.     | 2.           | IEI:Q42.How heard about OAI: other                                                                                                              |
| 1141                        | P02HR10    | Num  | 8   | YNDK.     | 3.           | IEI:Q42.How heard about OAI: don't know/ don't remember                                                                                         |

## The CONTENTS Procedure

| Variables in Creation Order |            |      |     |           |              |                                                                                                                                                 |
|-----------------------------|------------|------|-----|-----------|--------------|-------------------------------------------------------------------------------------------------------------------------------------------------|
| #                           | Variable   | Type | Len | Format    | Informat     | Label                                                                                                                                           |
| 1142                        | P02HR11    | Num  | 8   | YNDK.     | 3.           | IEI:Q42.How heard about OAI: refused                                                                                                            |
| 1143                        | P01SVDATE  | Num  | 8   | MMDDYY10. | DATETIME22.3 | SV:Date Screening Visit completed                                                                                                               |
| 1144                        | P01FAMHR   | Num  | 8   | YNDK.     | 3.           | SV:Q12.Mother, father, sister, or brother (blood relative) had hip replacement surgery for arthritis, where all or part of hip joint replaced   |
| 1145                        | P01FAMKR   | Num  | 8   | YNDK.     | 3.           | SV:Q13.Mother, father, sister, or brother (blood relative) had knee replacement surgery for arthritis, where all or part of knee joint replaced |
| 1146                        | P01MRIB4   | Num  | 8   | YNDK.     | 3.           | SV:Q1.Ever had MRI before                                                                                                                       |
| 1147                        | P01MRCMP   | Num  | 8   | YNDK.     | 3.           | SV:Q1b.Able to complete MRI scan                                                                                                                |
| 1148                        | P01CLAU    | Num  | 8   | YNDK.     | 3.           | SV:Q4.Have claustrophobia                                                                                                                       |
| 1149                        | V00MARITST | Num  | 8   | MARITALX. | 3.           | SAQ:Q3.Marital status                                                                                                                           |
| 1150                        | V00LIVE1   | Num  | 8   | YNDK.     | 2.           | SAQ:Q5.Live with spouse                                                                                                                         |
| 1151                        | V00LIVE2   | Num  | 8   | YNDK.     | 2.           | SAQ:Q5.Live with romantic partner                                                                                                               |
| 1152                        | V00LIVE3   | Num  | 8   | YNDK.     | 2.           | SAQ:Q5.Live with children                                                                                                                       |
| 1153                        | V00LIVE4   | Num  | 8   | YNDK.     | 2.           | SAQ:Q5.Live with other relatives or friends                                                                                                     |
| 1154                        | V00LIVE5   | Num  | 8   | YNDK.     | 2.           | SAQ:Q5.Live with someone else (not child, spouse, romantic partner)                                                                             |
| 1155                        | V00HLTHCAR | Num  | 8   | HEALTH2X. | 3.           | SAQ:Q7a.Where usually go for health care or advice about health care                                                                            |
| 1156                        | V00HLTHCOV | Num  | 8   | YNDK.     | 3.           | SAQ:Q8.Currently have any kind of health care coverage                                                                                          |
| 1157                        | V00MEDINS  | Num  | 8   | YNDK.     | 3.           | SAQ:Q9.Have any health insurance plan that pays for all or part of cost of prescription medicines                                               |
| 1158                        | V00EVDATE  | Num  | 8   | MMDDYY10. | DATETIME22.3 | EV:Date Enrollment Visit completed                                                                                                              |
| 1159                        | V00PA230   | Num  | 8   | YNDK.     | 3.           | EV:Q29.Kneel 30 minutes or more during single day, past 30 days                                                                                 |
| 1160                        | V00PA330   | Num  | 8   | YNDK.     | 3.           | EV:Q30.Squat 30 minutes or more during single day, past 30 days                                                                                 |
| 1161                        | V00PA530   | Num  | 8   | YNDK.     | 3.           | EV:Q31.Get in and out of squatting position 10 or more times during single day, past 30 days                                                    |
| 1162                        | V00PA430   | Num  | 8   | YNDK.     | 3.           | EV:Q32.Lift or move objects weighing 25 pounds or more by hand during single day, past 30 days                                                  |
| 1163                        | V00PA130   | Num  | 8   | YNDK.     | 3.           | EV:Q33.Climb up a total of 10 or more flights of stairs during single day, past 30 days (one flight is about 10 steps)                          |

## The CONTENTS Procedure

| Variables in Creation Order |            |      |     |          |          |                                                                                                 |
|-----------------------------|------------|------|-----|----------|----------|-------------------------------------------------------------------------------------------------|
| #                           | Variable   | Type | Len | Format   | Informat | Label                                                                                           |
| 1164                        | V00PA130NM | Num  | 8   | FREQ10X. | 3.       | EV:Q34.How many flights of stairs have you climbed up, past 7 days (one flight equals 10 steps) |
| 1165                        | V00PASE1   | Num  | 8   | TIME10X. | 3.       | EV:Leisure activities: sitting, past 7 days                                                     |
| 1166                        | V00PASE1HR | Num  | 8   | TIME18X. | 3.       | EV:Leisure activities: sitting, hours per day, past 7 days                                      |
| 1167                        | V00PASE2   | Num  | 8   | TIME10X. | 3.       | EV:Leisure activities: walking, past 7 days                                                     |
| 1168                        | V00PASE2HR | Num  | 8   | TIME18X. | 3.       | EV:Leisure activities: walking, hours per day, past 7 days                                      |
| 1169                        | V00PASE3   | Num  | 8   | TIME10X. | 3.       | EV:Leisure activities: light sport/ recreation, past 7 days                                     |
| 1170                        | V00PASE3HR | Num  | 8   | TIME18X. | 3.       | EV:Leisure activities: light sport/ recreation, hours per day, past 7 days                      |
| 1171                        | V00PASE4   | Num  | 8   | TIME10X. | 3.       | EV:Leisure activities: moderate sport/ recreation, past 7 days                                  |
| 1172                        | V00PASE4HR | Num  | 8   | TIME18X. | 3.       | EV:Leisure activities: moderate sport/ recreation, hours per day, past 7 days                   |
| 1173                        | V00PASE5   | Num  | 8   | TIME10X. | 3.       | EV:Leisure activities: strenuous sport/ recreation, past 7 days                                 |
| 1174                        | V00PASE5HR | Num  | 8   | TIME18X. | 3.       | EV:Leisure activities: strenuous sport/ recreation, hours per day, past 7 days                  |
| 1175                        | V00PASE6   | Num  | 8   | TIME10X. | 3.       | EV:Leisure activities: muscle strength/ endurance, past 7 days                                  |
| 1176                        | V00PASE6HR | Num  | 8   | TIME18X. | 3.       | EV:Leisure activities: muscle strength/ endurance, hours per day, past 7 days                   |
| 1177                        | V00HOUACT1 | Num  | 8   | YNDK.    | 3.       | EV:Household activities: light housework, past 7 days                                           |
| 1178                        | V00HOUACT2 | Num  | 8   | YNDK.    | 3.       | EV:Household activities: heavy housework, past 7 days                                           |
| 1179                        | V00HOUACT3 | Num  | 8   | YNDK.    | 3.       | EV:Household activities: home repairs, past 7 days                                              |
| 1180                        | V00HOUACT4 | Num  | 8   | YNDK.    | 3.       | EV:Household activities: lawn work/ yard care, past 7 days                                      |
| 1181                        | V00HOUACT5 | Num  | 8   | YNDK.    | 3.       | EV:Household activities: outdoor gardening, past 7 days                                         |
| 1182                        | V00HOUACT6 | Num  | 8   | YNDK.    | 3.       | EV:Household activities: caring for another person, past 7 days                                 |
| 1183                        | V00WORK7   | Num  | 8   | YNDK.    | 3.       | EV:Occupational activities: work (pay/ volunteer), past 7 days                                  |
| 1184                        | V00WORKAMT | Num  | 8   | JOB CAT. | 3.       | EV:Occupational activities: occupational activity level, past 7 days                            |

## The CONTENTS Procedure

| Variables in Creation Order |            |      |     |         |          |                                                                                                                                        |
|-----------------------------|------------|------|-----|---------|----------|----------------------------------------------------------------------------------------------------------------------------------------|
| #                           | Variable   | Type | Len | Format  | Informat | Label                                                                                                                                  |
| 1185                        | V00CUREMP  | Num  | 8   | YNDK.   | 3.       | EV:Q45.Currently work for pay (include self employed work for pay; answer Yes if on leave from work, expect to return within 6 months) |
| 1186                        | V00WEEKWK  | Num  | 8   | 3.      | 3.       | EV:Q46.About how many weeks worked, past 12 months (include paid vacation weeks as weeks worked)                                       |
| 1187                        | V00HOURWK  | Num  | 8   | 4.      | 4.       | EV:Q47.When worked how many hours per week usually work, past 12 months (include any overtime hours usually worked)                    |
| 1188                        | V00MISSWK  | Num  | 8   | 3.      | 3.       | EV:Q48.About how many half or full workdays missed because of knee pain, aching or stiffness, past 3 months                            |
| 1189                        | P02WTGA    | Num  | 8   | YNDK.   |          | IEI:Above weight cut-off for age/ gender group (calc, used for study eligibility)                                                      |
| 1190                        | P02KRS3CV  | Num  | 8   | SURG.   |          | IEI:Q13a.Which knee considering having replaced, next 3 years (calc)                                                                   |
| 1191                        | P02JBMPCV  | Num  | 8   | BUMP.   |          | IEI:Q16a.Hard bumps on fingers of right hand, left hand or both hands (calc, if=3 used for study eligibility)                          |
| 1192                        | P01MOMHRCV | Num  | 8   | YNDK.   |          | SV:Q12a.Mother had hip replacement surgery (calc)                                                                                      |
| 1193                        | P01DADHRCV | Num  | 8   | YNDK.   |          | SV:Q12b.Father had hip replacement surgery (calc)                                                                                      |
| 1194                        | P01SISHRCV | Num  | 8   | YNDK.   |          | SV:Q12c.Sister had hip replacement surgery (calc)                                                                                      |
| 1195                        | P01BROHRCV | Num  | 8   | YNDK.   |          | SV:Q12d.Brother had hip replacement surgery (calc)                                                                                     |
| 1196                        | P01MOMKRCV | Num  | 8   | YNDK.   |          | SV:Q13a.Mother had knee replacement surgery (calc)                                                                                     |
| 1197                        | P01DADKRCV | Num  | 8   | YNDK.   |          | SV:Q13b.Father had knee replacement surgery (calc)                                                                                     |
| 1198                        | P01SISKRCV | Num  | 8   | YNDK.   |          | SV:Q13c.Sister had knee replacement surgery (calc)                                                                                     |
| 1199                        | P01BROKRCV | Num  | 8   | YNDK.   |          | SV:Q13d.Brother had knee replacement surgery (calc)                                                                                    |
| 1200                        | P01MRKCBCV | Num  | 8   | KNEE3X. |          | SV:Q1c.Knees fit comfortably inside knee coil with coil completely closed (calc)                                                       |
| 1201                        | V00INCOME  | Num  | 8   | INCOME. |          | SAQ:Yearly income (calc)                                                                                                               |
| 1202                        | V00AGE     | Num  | 8   |         |          | EV:Age (calc, used for study eligibility)                                                                                              |
| 1203                        | V00PA230CV | Num  | 8   | FREQ2Z. |          | EV:Q29a.How often kneel 30 minutes or more during typical week, past 30 days (calc)                                                    |
| 1204                        | V00PA330CV | Num  | 8   | FREQ2Z. |          | EV:Q30a.How often squat for 30 minutes or more during typical week, past 30 days (calc)                                                |

## The CONTENTS Procedure

| Variables in Creation Order |            |      |     |          |          |                                                                                                                      |
|-----------------------------|------------|------|-----|----------|----------|----------------------------------------------------------------------------------------------------------------------|
| #                           | Variable   | Type | Len | Format   | Informat | Label                                                                                                                |
| 1205                        | V00PA530CV | Num  | 8   | FREQ2Z.  |          | EV:Q31a.How often get in and out of squatting position 10 or more times during a typical week, past 30 days (calc)   |
| 1206                        | V00PA430CV | Num  | 8   | FREQ2Z.  |          | EV:Q32a.How often lift or move objects weighing 25 pounds or more by hand during a typical week, past 30 days (calc) |
| 1207                        | V00PA130CV | Num  | 8   | FREQ2Z.  |          | EV:Q33a.How often climb up total of 10 or more flights of stairs during typical week, past 30 days (calc)            |
| 1208                        | V00PASE    | Num  | 8   |          |          | EV:Physical Activity Scale for the Elderly (PASE) score (calc)                                                       |
| 1209                        | V00CEMPLOY | Num  | 8   | EMPLOY.  |          | EV:Current employment (calc)                                                                                         |
| 1210                        | V00ENRCR1  | Num  | 8   | YNDK.    | 2.       | Enr Expn:Q1.Exception to eligibility criteria, no acceptable screening knee x-ray, can be for cohort assignment only |
| 1211                        | V00ENRCR2  | Num  | 8   | YNDK.    | 2.       | Enr Expn:Q1.Exception to eligibility criteria, minimum MRI requirements for enrollment not met                       |
| 1212                        | V00ENRCR3  | Num  | 8   | YNDK.    | 2.       | Enr Expn:Q1.Exception to eligibility criteria, minimum blood collection requirements for enrollment not met          |
| 1213                        | V00ENRCR4  | Num  | 8   | YNDK.    | 2.       | Enr Expn:Q1.Exception to eligibility criteria, minimum urine collection requirements for enrollment not met          |
| 1214                        | V00ENRCR5  | Num  | 8   | YNDK.    | 2.       | Enr Expn:Q1.Exception to eligibility criteria, minimum baseline requirements met but outside of designated window    |
| 1215                        | V00ENRCR6  | Num  | 8   | YNDK.    | 2.       | Enr Expn:Q1.Exception to eligibility criteria, did not fulfill risk-factor eligibility criteria for assigned cohort  |
| 1216                        | V00ENREXCP | Num  | 8   | YNDK.    |          | Enr Expn:Participant has enrollment exception (calc)                                                                 |
| 1217                        | V00HANDED  | Num  | 8   | RLDK.    |          | EV XR:Dominant hand for hand x-ray (calc)                                                                            |
| 1218                        | P02STMEDCV | Num  | 8   | STMED.   |          | IEI:Q23a.Told what study medications taken for research study (calc)                                                 |
| 1219                        | P01MRPRBCV | Num  | 8   | YNDK.    |          | SV:Q1a.Any problems related to the MRI scan (calc)                                                                   |
| 1220                        | V00EDCV    | Num  | 8   | GRADECV. |          | SAQ:Q6.Highest grade or year of school completed (calc)                                                              |
| 1221                        | V00LIVENO  | Num  | 8   | LIVENOB. |          | SAQ:Q4.Besides self, how many other people live in household (calc)                                                  |
| 1222                        | P02ELGRISK | Num  | 8   | RISKF.   |          | IEI:Knee symptoms, risk factors, or both, status at IEI/ SV (calc)                                                   |

### The CONTENTS Procedure

---

#### Variables in Creation Order

| #    | Variable   | Type | Len | Format    | Informat | Label                                                                                                  |
|------|------------|------|-----|-----------|----------|--------------------------------------------------------------------------------------------------------|
| 1223 | V00INCOME2 | Num  | 8   | INCOMET.  |          | SAQ:Yearly income (>50K or <50K) (calc)                                                                |
| 1224 | P02ACTRISK | Num  | 8   | YNDK.     |          | IEI:Engage in at least one frequent knee bending activity (calc, used for study eligibility initially) |
| 1225 | P02IKPRISK | Num  | 8   | PAINFREQ. |          | IEI:Either knee symptom status at IEI (calc, used for study eligibility)                               |
| 1226 | V00WKHR7CV | Num  | 8   |           |          | EV:Occupational activities: number of hours worked, past 7 days (calc)                                 |

---
